# Supplementary material for: EVI1 Promotes the Proliferation and Invasive Properties of Human Head and Neck Squamous Cell Carcinoma Cells
Source: Int J Mol Sci. 2022 Jan 19;23(3):1050. doi: 10.3390/ijms23031050 (PMC8835242; doi:10.3390/ijms23031050)
Supplement: Supplementary file 1 [file ijms-23-01050-s001.zip › ijms-1537380-Supplementary Table S1.xlsx]

## Sheet: S1A
Supplementary Table S1A. Results of RNA-seq analysis. List of 3,377 genes differentially expressed at a false discovery rate (FDR) < 0.1 between CAL-33_EVI1 and CAL-33_vec cells.
Positive log2FoldChange values indicate up-regulation by EVI1; negative log2FoldChange values indicate down-regulation by EVI1.
Gene Symbol	Ensembl Gene ID	Description	log2FoldChange	FDR
SAMD5	ENSG00000203727	sterile alpha motif domain containing 5	5.22555	4.53581e-16
NKD2	ENSG00000145506	NKD inhibitor of WNT signaling pathway 2	5.17893	4.48874e-05
CAPN8	ENSG00000203697	calpain 8	5.14687	0.000264923
PLPPR5	ENSG00000117598	phospholipid phosphatase related 5	5.00304	0.000294209
DPF3	ENSG00000205683	double PHD fingers 3	4.81998	0.000959548
KRT75	ENSG00000170454	keratin 75	4.70247	5.72037e-07
PDE2A	ENSG00000186642	phosphodiesterase 2A	4.4902	0.00144481
CYP24A1	ENSG00000019186	cytochrome P450 family 24 subfamily A member 1	4.25579	0.00474959
BX119927.1	ENSG00000283178	chromosome X open reading frame 49 (CXorf49) pseudogene]	4.09037	0.00250643
MSLN	ENSG00000102854	mesothelin	3.9005	0.0102415
MME	ENSG00000196549	membrane metalloendopeptidase	3.87572	0.00696001
PCDH18	ENSG00000189184	protocadherin 18	3.83282	0.00583753
TMEM92	ENSG00000167105	transmembrane protein 92	3.82048	0.00794821
IL6	ENSG00000136244	interleukin 6	3.7625	0.0217498
CLMP	ENSG00000166250	CXADR like membrane protein	3.74841	3.4423e-28
TNFRSF19	ENSG00000127863	TNF receptor superfamily member 19	3.73718	0.0159001
MIR100HG	ENSG00000255248	mir-100-let-7a-2-mir-125b-1 cluster host gene	3.72583	0.0106504
DPP6	ENSG00000130226	dipeptidyl peptidase like 6	3.71592	0.0160451
PCDH19	ENSG00000165194	protocadherin 19	3.63667	3.00391e-11
SPRY4	ENSG00000187678	sprouty RTK signaling antagonist 4	3.58381	0.0193497
DIO2	ENSG00000211448	iodothyronine deiodinase 2	3.54893	3.10079e-11
VLDLR	ENSG00000147852	very low density lipoprotein receptor	3.48754	0.00475462
CREB5	ENSG00000146592	cAMP responsive element binding protein 5	3.446	1.1971e-16
NOS1	ENSG00000089250	nitric oxide synthase 1	3.42773	3.33357e-18
KRT16P6	ENSG00000226145	keratin 16 pseudogene 6	3.39161	0.00246683
DTNA	ENSG00000134769	dystrobrevin alpha	3.36902	0.00969371
SLIT2	ENSG00000145147	slit guidance ligand 2	3.34007	0.00910002
SP140	ENSG00000079263	SP140 nuclear body protein	3.27105	0.00657705
XYLT1	ENSG00000103489	xylosyltransferase 1	3.2515	0.0605793
ALOX12	ENSG00000108839	arachidonate 12-lipoxygenase, 12S type	3.23501	0.024108
LOC157273	ENSG00000248538	novel transcript]	3.20616	0.0241659
AC079316.1	ENSG00000258111	ATP synthase, H+ transporting, mitochondrial Fo complex, subunit C1 (subunit 9) (ATP5G1) pseudogene]	3.16733	0.0450464
FAM166C	ENSG00000173557	family with sequence similarity 166 member C	3.16439	0.0487759
CCND2	ENSG00000118971	cyclin D2	3.1163	8.12605e-18
PDCD1LG2	ENSG00000197646	programmed cell death 1 ligand 2	3.05857	0.00395208
NLRP7	ENSG00000167634	NLR family pyrin domain containing 7	3.03238	0.0199256
PTX3	ENSG00000163661	pentraxin 3	3.01791	0.0674843
AOC1	ENSG00000002726	amine oxidase copper containing 1	2.99343	0.0650248
CXCL14	ENSG00000145824	C-X-C motif chemokine ligand 14	2.95909	7.05817e-07
IRAG1	ENSG00000072952	inositol 1,4,5-triphosphate receptor associated 1	2.93184	0.0286747
AC211476.2	ENSG00000272843	novel transcript, antisense to POM121]	2.90257	0.0110285
PGF	ENSG00000119630	placental growth factor	2.90086	0.00140029
SYT16	ENSG00000139973	synaptotagmin 16	2.89035	6.25481e-08
ANXA6	ENSG00000197043	annexin A6	2.87909	0.0872912
CDH13	ENSG00000140945	cadherin 13	2.87181	0.000261393
SIM2	ENSG00000159263	SIM bHLH transcription factor 2	2.85764	6.44094e-05
CSAG1	ENSG00000198930	chondrosarcoma associated gene 1	2.85124	0.00361825
PRR7-AS1	ENSG00000246334	PRR7 antisense RNA 1	2.82383	0.000124528
SNORA33	ENSG00000200534	small nucleolar RNA, H/ACA box 33	2.80636	2.55215e-05
CDYL2	ENSG00000166446	chromodomain Y like 2	2.78333	4.09141e-06
PLCB2	ENSG00000137841	phospholipase C beta 2	2.78252	0.0953908
GALNT14	ENSG00000158089	polypeptide N-acetylgalactosaminyltransferase 14	2.77983	0.0220149
ANGPTL4	ENSG00000167772	angiopoietin like 4	2.76501	4.81785e-06
L1CAM	ENSG00000198910	L1 cell adhesion molecule	2.74279	0.000184551
TGFBR3	ENSG00000069702	transforming growth factor beta receptor 3	2.73651	1.23918e-16
IL31RA	ENSG00000164509	interleukin 31 receptor A	2.69513	0.010947
TMEM98	ENSG00000006042	transmembrane protein 98	2.6739	1.53227e-05
LZTS1	ENSG00000061337	leucine zipper tumor suppressor 1	2.67241	0.000582842
KLF12	ENSG00000118922	Kruppel like factor 12	2.65986	0.000353357
AL390961.2	ENSG00000235843	novel transcript]	2.59225	0.0428068
THAP5P1	ENSG00000224324	THAP domain containing 5 pseudogene 1	2.571	0.0812903
TH	ENSG00000180176	tyrosine hydroxylase	2.55533	0.00348928
FRMD3	ENSG00000172159	FERM domain containing 3	2.52802	0.0872739
TIMP4	ENSG00000157150	TIMP metallopeptidase inhibitor 4	2.52333	0.0040876
MAP7D2	ENSG00000184368	MAP7 domain containing 2	2.52134	4.62999e-08
NECTIN3	ENSG00000177707	nectin cell adhesion molecule 3	2.5146	3.60553e-11
FOXA2	ENSG00000125798	forkhead box A2	2.49228	9.84591e-13
GNB4	ENSG00000114450	G protein subunit beta 4	2.48587	4.8095e-20
NRGN	ENSG00000154146	neurogranin	2.44358	7.01598e-06
TUBA1A	ENSG00000167552	tubulin alpha 1a	2.44223	0.00222842
GCNT2	ENSG00000111846	glucosaminyl (N-acetyl) transferase 2 (I blood group)	2.41403	4.14969e-12
AC026124.2	ENSG00000276853	novel transcript, sense intronic to LEMD3]	2.39915	0.0951352
ONECUT3	ENSG00000205922	one cut homeobox 3	2.39894	0.091351
ALPP	ENSG00000163283	alkaline phosphatase, placental	2.3942	0.000193366
RGS14	ENSG00000169220	regulator of G protein signaling 14	2.38496	7.22002e-08
SSTR5-AS1	ENSG00000261713	SSTR5 antisense RNA 1	2.37101	0.0290919
NMNAT2	ENSG00000157064	nicotinamide nucleotide adenylyltransferase 2	2.34545	3.83259e-06
SLC28A3	ENSG00000197506	solute carrier family 28 member 3	2.34494	0.000130376
AC005865.2	ENSG00000250770	tetraspanin 11 (TSPAN11) pseudogene]	2.31343	0.000686329
HKDC1	ENSG00000156510	hexokinase domain containing 1	2.31267	0.0120015
GMPR	ENSG00000137198	guanosine monophosphate reductase	2.30939	0.000178421
MGLL	ENSG00000074416	monoglyceride lipase	2.29599	1.8448e-10
FGFR1	ENSG00000077782	fibroblast growth factor receptor 1	2.29546	0.00252517
CALB2	ENSG00000172137	calbindin 2	2.29533	0.0732905
BNC2	ENSG00000173068	basonuclin 2	2.28874	0.00956097
GALNT10	ENSG00000164574	polypeptide N-acetylgalactosaminyltransferase 10	2.2549	1.75792e-10
SLC8A1	ENSG00000183023	solute carrier family 8 member A1	2.2454	1.40295e-09
SP5	ENSG00000204335	Sp5 transcription factor	2.23838	0.054786
SEMA7A	ENSG00000138623	semaphorin 7A (John Milton Hagen blood group)	2.2362	7.50294e-07
SLC35G2	ENSG00000168917	solute carrier family 35 member G2	2.21363	0.0960218
AIF1L	ENSG00000126878	allograft inflammatory factor 1 like	2.20684	8.24278e-12
CA12	ENSG00000074410	carbonic anhydrase 12	2.19475	0.000272436
SHANK2	ENSG00000162105	SH3 and multiple ankyrin repeat domains 2	2.17938	0.00147484
AC092139.3	ENSG00000279476	novel transcript]	2.17213	0.0913329
CNTNAP2	ENSG00000174469	contactin associated protein 2	2.16592	0.00561094
IL11	ENSG00000095752	interleukin 11	2.13891	0.00284525
PARD3B	ENSG00000116117	par-3 family cell polarity regulator beta	2.11416	0.0617797
MYH16	ENSG00000002079	myosin heavy chain 16 pseudogene	2.11284	0.0722627
GRB10	ENSG00000106070	growth factor receptor bound protein 10	2.09274	2.00667e-13
DLC1	ENSG00000164741	DLC1 Rho GTPase activating protein	2.08601	2.12772e-06
SNORA74D	ENSG00000252213	small nucleolar RNA, H/ACA box 74D	2.07838	0.0316898
FOSL1	ENSG00000175592	FOS like 1, AP-1 transcription factor subunit	2.07818	4.54926e-06
RNU6-979P	ENSG00000206623	RNA, U6 small nuclear 979, pseudogene	2.0693	0.0373845
SLC38A4	ENSG00000139209	solute carrier family 38 member 4	2.06451	0.0496243
SUPT16HP1	ENSG00000256238	SPT16 homolog, facilitates chromatin remodeling subunit pseudogene 1	2.06163	0.0677887
PCOLCE2	ENSG00000163710	procollagen C-endopeptidase enhancer 2	2.06115	2.96636e-11
DACT3	ENSG00000197380	dishevelled binding antagonist of beta catenin 3	2.05904	0.00152902
KIF26A	ENSG00000066735	kinesin family member 26A	2.05055	1.55876e-09
SLC2A13	ENSG00000151229	solute carrier family 2 member 13	2.04121	0.00228408
ADAMTSL4	ENSG00000143382	ADAMTS like 4	2.03928	0.0804559
AKAP7	ENSG00000118507	A-kinase anchoring protein 7	2.00471	0.0905628
GBP5	ENSG00000154451	guanylate binding protein 5	1.98798	6.3911e-09
SEMA3B	ENSG00000012171	semaphorin 3B	1.98731	0.0014512
DDX10P1	ENSG00000237135	DEAD-box helicase 10 pseudogene 1	1.98559	0.0988099
DMRT1	ENSG00000137090	doublesex and mab-3 related transcription factor 1	1.97655	0.0246223
MCTP1	ENSG00000175471	multiple C2 and transmembrane domain containing 1	1.97306	0.000120034
TNNI2	ENSG00000130598	troponin I2, fast skeletal type	1.95275	0.0829126
SPRR2E	ENSG00000203785	small proline rich protein 2E	1.88731	0.0832027
RPL23P4	ENSG00000223903	ribosomal protein L23 pseudogene 4	1.86824	0.0546115
SPEG	ENSG00000072195	striated muscle enriched protein kinase	1.868	0.00121183
MYO3B	ENSG00000071909	myosin IIIB	1.85075	6.27568e-10
AC002401.4	ENSG00000276851	novel transcript]	1.84515	0.000149883
OTUD7A	ENSG00000169918	OTU deubiquitinase 7A	1.84349	0.0864264
TCF7	ENSG00000081059	transcription factor 7	1.84312	3.1103e-15
MAB21L4	ENSG00000172478	mab-21 like 4	1.84102	4.23883e-08
CYSRT1	ENSG00000197191	cysteine rich tail 1	1.83728	2.81477e-08
CDKN1C	ENSG00000129757	cyclin dependent kinase inhibitor 1C	1.83108	2.10946e-09
CXCL11	ENSG00000169248	C-X-C motif chemokine ligand 11	1.80774	0.00112325
AC103702.2	ENSG00000272763	novel transcript]	1.80117	0.0514364
SLCO4A1	ENSG00000101187	solute carrier organic anion transporter family member 4A1	1.78474	4.32005e-15
AP000919.1	ENSG00000263606	CHORDC1 pseudogene 4	1.78165	0.0859716
KRT17	ENSG00000128422	keratin 17	1.77946	4.41249e-10
SHISAL1	ENSG00000138944	shisa like 1	1.76726	0.00357541
PTGS1	ENSG00000095303	prostaglandin-endoperoxide synthase 1	1.74543	4.18817e-18
BARX1	ENSG00000131668	BARX homeobox 1	1.73728	0.000499156
DEPP1	ENSG00000165507	DEPP1 autophagy regulator	1.73611	0.0160249
IFNL1	ENSG00000182393	interferon lambda 1	1.72848	0.0388444
COX6B2	ENSG00000160471	cytochrome c oxidase subunit 6B2	1.72724	0.0307318
HOXB4	ENSG00000182742	homeobox B4	1.725	0.0363482
SLC6A15	ENSG00000072041	solute carrier family 6 member 15	1.72379	9.25246e-06
JAZF1	ENSG00000153814	JAZF zinc finger 1	1.71562	1.0326e-07
IER3	ENSG00000137331	immediate early response 3	1.71198	9.33494e-19
LINC-PINT	ENSG00000226380	novel transcript]	1.7097	0.00841399
NEK3	ENSG00000136098	NIMA related kinase 3	1.70883	8.77553e-08
RPL14P1	ENSG00000139239	ribosomal protein L14 pseudogene 1	1.70751	0.0732905
JPH2	ENSG00000149596	junctophilin 2	1.69564	0.0174656
ADAMTS1	ENSG00000154734	ADAM metallopeptidase with thrombospondin type 1 motif 1	1.69495	0.0284677
FAM178B	ENSG00000168754	family with sequence similarity 178 member B	1.69492	0.0504833
FAM167A	ENSG00000154319	family with sequence similarity 167 member A	1.68721	0.0870399
CGNL1	ENSG00000128849	cingulin like 1	1.68116	0.000441437
FZD4	ENSG00000174804	frizzled class receptor 4	1.67809	0.00140158
IL18BP	ENSG00000137496	interleukin 18 binding protein	1.67541	0.0120015
NINJ2	ENSG00000171840	ninjurin 2	1.66367	0.0714727
EPB41L2	ENSG00000079819	erythrocyte membrane protein band 4.1 like 2	1.66339	0.010947
CCN3	ENSG00000136999	cellular communication network factor 3	1.6608	2.27549e-15
PPP2R2C	ENSG00000074211	protein phosphatase 2 regulatory subunit Bgamma	1.66063	4.9492e-15
EEF1A2	ENSG00000101210	eukaryotic translation elongation factor 1 alpha 2	1.65812	1.41993e-13
NEFL	ENSG00000277586	neurofilament light	1.65659	1.02673e-09
ABCC4	ENSG00000125257	ATP binding cassette subfamily C member 4	1.65325	2.69442e-12
LIF-AS2	ENSG00000268812	LIF antisense RNA 2	1.65311	0.0323014
ZNF438	ENSG00000183621	zinc finger protein 438	1.64506	0.000351895
SLC12A7	ENSG00000113504	solute carrier family 12 member 7	1.64235	2.39494e-05
KCNQ1	ENSG00000053918	potassium voltage-gated channel subfamily Q member 1	1.63199	0.0116667
ANKRD33B	ENSG00000164236	ankyrin repeat domain 33B	1.62744	4.74191e-06
AKR1C1	ENSG00000187134	aldo-keto reductase family 1 member C1	1.62409	0.000128316
APCDD1L-DT	ENSG00000231290	APCDD1L divergent transcript	1.62251	0.0237151
PDGFA	ENSG00000197461	platelet derived growth factor subunit A	1.62174	1.14083e-17
FERMT2	ENSG00000073712	fermitin family member 2	1.61748	8.598e-07
SYT7	ENSG00000011347	synaptotagmin 7	1.61626	2.31662e-05
IFITM2	ENSG00000185201	interferon induced transmembrane protein 2	1.61285	2.06276e-08
AL121832.3	ENSG00000275437	novel transcript, sense intronic to CABLES2]	1.60911	0.0702273
SH2D5	ENSG00000189410	SH2 domain containing 5	1.5957	2.41249e-05
ANKRD6	ENSG00000135299	ankyrin repeat domain 6	1.59159	0.0535946
PDE4A	ENSG00000065989	phosphodiesterase 4A	1.5813	0.00456274
FSTL3	ENSG00000070404	follistatin like 3	1.58074	6.8101e-08
ULBP1	ENSG00000111981	UL16 binding protein 1	1.57708	0.01936
MDFI	ENSG00000112559	MyoD family inhibitor	1.57416	0.000178421
LINC00707	ENSG00000238266	long intergenic non-protein coding RNA 707	1.56599	0.0013523
DENND5B	ENSG00000170456	DENN domain containing 5B	1.56213	0.000905523
ARC	ENSG00000198576	activity regulated cytoskeleton associated protein	1.56081	0.0711452
AL024508.2	ENSG00000272189	novel transcript, antisense to MAP7]	1.56036	0.0452236
USP51	ENSG00000247746	ubiquitin specific peptidase 51	1.5588	0.0742954
NEXN	ENSG00000162614	nexilin F-actin binding protein	1.55611	7.4995e-11
GPAT3	ENSG00000138678	glycerol-3-phosphate acyltransferase 3	1.55138	0.000147509
AC145098.2	ENSG00000279821	TEC]	1.54604	0.0231884
SLC12A4	ENSG00000124067	solute carrier family 12 member 4	1.54289	3.18338e-05
ATP2C2	ENSG00000064270	ATPase secretory pathway Ca2+ transporting 2	1.53548	1.69206e-05
OAF	ENSG00000184232	out at first homolog	1.53506	2.23888e-14
LINC00431	ENSG00000225760	long intergenic non-protein coding RNA 431	1.5298	0.00884825
SMARCE1P1	ENSG00000225215	SWI/SNF related, matrix associated, actin dependent regulator of chromatin, subfamily e, member 1 pseudogene 1	1.52638	0.0962448
SYNE1	ENSG00000131018	spectrin repeat containing nuclear envelope protein 1	1.52484	1.02283e-06
EML1	ENSG00000066629	EMAP like 1	1.52401	0.00205092
CSPG4	ENSG00000173546	chondroitin sulfate proteoglycan 4	1.51646	0.0642581
RNU6-60P	ENSG00000201662	RNA, U6 small nuclear 60, pseudogene	1.50876	0.0409507
PTGS2	ENSG00000073756	prostaglandin-endoperoxide synthase 2	1.50605	0.00301328
KRT16	ENSG00000186832	keratin 16	1.49836	0.000815719
SUSD2	ENSG00000099994	sushi domain containing 2	1.49335	0.0343637
DCP1B	ENSG00000151065	decapping mRNA 1B	1.49253	0.000477221
RAET1L	ENSG00000155918	retinoic acid early transcript 1L	1.49212	0.0088246
DNAAF3	ENSG00000167646	dynein axonemal assembly factor 3	1.48841	0.00423379
PRR7	ENSG00000131188	proline rich 7, synaptic	1.4847	0.00397853
SNORA23	ENSG00000201998	small nucleolar RNA, H/ACA box 23	1.47904	0.00252517
LINC00941	ENSG00000285517	long intergenic non-protein coding RNA 941]	1.47402	0.00134836
TTLL7	ENSG00000137941	tubulin tyrosine ligase like 7	1.46685	0.00417804
PDLIM2	ENSG00000120913	PDZ and LIM domain 2	1.4637	2.80308e-10
AC091057.6	ENSG00000284906	novel transcript]	1.46361	0.00749395
TRIM55	ENSG00000147573	tripartite motif containing 55	1.46317	0.0378595
AC073957.3	ENSG00000273151	novel transcript, antisense to GET4]	1.45314	0.00032058
CCN5	ENSG00000064205	cellular communication network factor 5	1.44865	0.0130621
LIMCH1	ENSG00000064042	LIM and calponin homology domains 1	1.4438	6.88581e-07
PRECSIT	ENSG00000255874	p53 regulated carcinoma associated Stat3 activating long intergenic non-protein coding transcript	1.44044	0.000174904
AP3B2	ENSG00000103723	adaptor related protein complex 3 subunit beta 2	1.43605	0.0088739
NAGS	ENSG00000161653	N-acetylglutamate synthase	1.43554	0.0168782
VTRNA1-3	ENSG00000202515	vault RNA 1-3	1.43374	0.0130639
AC012676.5	ENSG00000280063	tec]	1.42989	0.0151567
ND6	ENSG00000198695	mitochondrially encoded NADH:ubiquinone oxidoreductase core subunit 6	1.42622	0.00608727
EREG	ENSG00000124882	epiregulin	1.42594	0.00129941
FHL3	ENSG00000183386	four and a half LIM domains 3	1.42471	0.000234101
AXL	ENSG00000167601	AXL receptor tyrosine kinase	1.41808	0.0290902
DOK7	ENSG00000175920	docking protein 7	1.40871	0.00132143
CCDC88A	ENSG00000115355	coiled-coil domain containing 88A	1.40848	4.18817e-18
CH25H	ENSG00000138135	cholesterol 25-hydroxylase	1.40073	0.0234449
NOCT	ENSG00000151014	nocturnin	1.39022	0.00680071
LETM2	ENSG00000165046	leucine zipper and EF-hand containing transmembrane protein 2	1.38706	5.45192e-05
PIP4P2	ENSG00000155099	phosphatidylinositol-4,5-bisphosphate 4-phosphatase 2	1.38689	0.000345069
MIR503HG	ENSG00000223749	MIR503 host gene	1.3858	0.0066026
ADAP1	ENSG00000105963	ArfGAP with dual PH domains 1	1.37999	1.36761e-09
RAMP1	ENSG00000132329	receptor activity modifying protein 1	1.37937	1.58218e-11
ADAM23	ENSG00000114948	ADAM metallopeptidase domain 23	1.37673	0.00701262
TMPRSS13	ENSG00000137747	transmembrane serine protease 13	1.37657	0.00709831
NFE2L3	ENSG00000050344	nuclear factor, erythroid 2 like 3	1.37555	3.49556e-08
LRP4	ENSG00000134569	LDL receptor related protein 4	1.37514	0.00448279
AL121769.1	ENSG00000242163	ribosomal protein S24 (RPS24) pseudogene]	1.37001	0.0902085
POLR1G	ENSG00000117877	RNA polymerase I subunit G	1.36285	1.80686e-07
ITPR1	ENSG00000150995	inositol 1,4,5-trisphosphate receptor type 1	1.36188	0.0310512
DUSP8	ENSG00000184545	dual specificity phosphatase 8	1.36064	0.0421373
CCL5	ENSG00000271503	C-C motif chemokine ligand 5	1.35982	0.00307888
SCLY	ENSG00000132330	selenocysteine lyase	1.35938	0.000863281
TAF4B	ENSG00000141384	TATA-box binding protein associated factor 4b	1.35668	0.005064
AP003498.2	ENSG00000285933	novel transcript]	1.35213	0.0851181
NAV1	ENSG00000134369	neuron navigator 1	1.34792	3.68265e-11
GCOM1	ENSG00000137878	GRINL1A complex locus 1	1.34552	0.0345768
MGAT5B	ENSG00000167889	alpha-1,6-mannosylglycoprotein 6-beta-N-acetylglucosaminyltransferase B	1.34221	0.00183142
RN7SL832P	ENSG00000243819	RNA, 7SL, cytoplasmic 832, pseudogene	1.34027	0.0576553
RNU4-80P	ENSG00000200070	RNA, U4 small nuclear 80, pseudogene	1.33849	0.0588258
C14orf132	ENSG00000227051	chromosome 14 open reading frame 132	1.33364	0.0151594
HOXA11	ENSG00000005073	homeobox A11	1.329	1.55876e-09
PHLDA2	ENSG00000181649	pleckstrin homology like domain family A member 2	1.32713	1.56006e-19
FADS3	ENSG00000221968	fatty acid desaturase 3	1.32522	6.13367e-15
GAL	ENSG00000069482	galanin and GMAP prepropeptide	1.32064	0.0329268
LCA5L	ENSG00000157578	lebercilin LCA5 like	1.32023	0.0677584
AC009502.1	ENSG00000227308	long intergenic non-protein coding RNA 2832	1.31634	0.0823291
RHOBTB1	ENSG00000072422	Rho related BTB domain containing 1	1.31434	0.0953893
DIXDC1	ENSG00000150764	DIX domain containing 1	1.31067	0.0956152
EDN1	ENSG00000078401	endothelin 1	1.31037	0.0590708
CCBE1	ENSG00000183287	collagen and calcium binding EGF domains 1	1.30895	0.0161504
QSOX1	ENSG00000116260	quiescin sulfhydryl oxidase 1	1.30626	3.20317e-13
ETV5	ENSG00000244405	ETS variant transcription factor 5	1.30015	0.00119818
ZSCAN12P1	ENSG00000219891	zinc finger and SCAN domain containing 12 pseudogene 1	1.2993	0.0707298
HCLS1	ENSG00000180353	hematopoietic cell-specific Lyn substrate 1	1.29142	0.0506515
PTP4A3	ENSG00000184489	protein tyrosine phosphatase 4A3	1.27961	0.0687585
SLC7A11	ENSG00000151012	solute carrier family 7 member 11	1.27848	3.34116e-08
FSD1L	ENSG00000106701	fibronectin type III and SPRY domain containing 1 like	1.27542	0.0184451
SNORD13	ENSG00000239039	small nucleolar RNA, C/D box 13	1.2729	0.0190678
DSEL	ENSG00000171451	dermatan sulfate epimerase like	1.27074	0.0964625
ABO	ENSG00000175164	ABO, alpha 1-3-N-acetylgalactosaminyltransferase and alpha 1-3-galactosyltransferase	1.26931	0.0207678
CCDC134	ENSG00000100147	coiled-coil domain containing 134	1.26849	0.00154071
MEF2C	ENSG00000081189	myocyte enhancer factor 2C	1.26425	0.0378595
CORO6	ENSG00000167549	coronin 6	1.26379	0.00154241
PLCG2	ENSG00000197943	phospholipase C gamma 2	1.2619	0.00729309
TNS1	ENSG00000079308	tensin 1	1.26132	0.0286747
SPOCD1	ENSG00000134668	SPOC domain containing 1	1.25671	0.00118553
RORA	ENSG00000069667	RAR related orphan receptor A	1.25366	0.021046
SPRY1	ENSG00000164056	sprouty RTK signaling antagonist 1	1.25311	0.00391339
RASA3	ENSG00000185989	RAS p21 protein activator 3	1.25278	0.0176735
MAPKAPK3	ENSG00000114738	MAPK activated protein kinase 3	1.2437	4.08882e-07
THSD1	ENSG00000136114	thrombospondin type 1 domain containing 1	1.24155	0.000820942
NCF2	ENSG00000116701	neutrophil cytosolic factor 2	1.24049	1.21166e-08
SLC45A3	ENSG00000158715	solute carrier family 45 member 3	1.23676	0.0317733
ZIC5	ENSG00000139800	Zic family member 5	1.23066	0.0576553
E2F5	ENSG00000133740	E2F transcription factor 5	1.22973	0.00724215
TBC1D4	ENSG00000136111	TBC1 domain family member 4	1.22771	8.79407e-08
LGALS1	ENSG00000100097	galectin 1	1.22488	1.15128e-09
PVR	ENSG00000073008	PVR cell adhesion molecule	1.22319	1.77365e-10
MUC1	ENSG00000185499	mucin 1, cell surface associated	1.22026	0.0342426
UAP1	ENSG00000117143	UDP-N-acetylglucosamine pyrophosphorylase 1	1.21666	5.69404e-12
DLX3	ENSG00000064195	distal-less homeobox 3	1.21608	0.00439569
GGT6	ENSG00000167741	gamma-glutamyltransferase 6	1.21578	0.000962648
AL157871.5	ENSG00000258904	novel transcript, intronic to YY1]	1.21511	0.074193
ZNF205	ENSG00000122386	zinc finger protein 205	1.21317	0.0419056
MYEOV	ENSG00000172927	myeloma overexpressed	1.21206	0.00168678
PEAR1	ENSG00000187800	platelet endothelial aggregation receptor 1	1.20266	0.0210282
RSAD2	ENSG00000134321	radical S-adenosyl methionine domain containing 2	1.19613	0.009545
SNORD104	ENSG00000199753	small nucleolar RNA, C/D box 104	1.19215	0.000682681
MTHFD2L	ENSG00000163738	methylenetetrahydrofolate dehydrogenase (NADP+ dependent) 2 like	1.18926	1.80779e-13
SLC46A1	ENSG00000076351	solute carrier family 46 member 1	1.1863	1.65779e-06
AC006329.1	ENSG00000232445	E2F1 mRNA stabilizing lncRNA	1.18456	0.00869362
ARHGAP25	ENSG00000163219	Rho GTPase activating protein 25	1.18309	0.0102786
HCP5	ENSG00000206337	HLA complex P5	1.17995	0.000178421
AFAP1L1	ENSG00000157510	actin filament associated protein 1 like 1	1.17845	0.0301502
HRH1	ENSG00000196639	histamine receptor H1	1.17697	1.18748e-05
LOC112267931; DAB2	ENSG00000153071	DAB adaptor protein 2	1.1756	0.0172256
PIK3CD	ENSG00000171608	phosphatidylinositol-4,5-bisphosphate 3-kinase catalytic subunit delta	1.17473	0.00684225
RAB36	ENSG00000100228	RAB36, member RAS oncogene family	1.17299	0.00153736
RAB29	ENSG00000117280	RAB29, member RAS oncogene family	1.16549	4.10125e-09
TSPAN1	ENSG00000117472	tetraspanin 1	1.16538	1.77852e-09
TNNT1	ENSG00000105048	troponin T1, slow skeletal type	1.16512	1.80381e-09
AC108718.1	ENSG00000239941	novel transcript]	1.16201	0.0313348
AFAP1-AS1	ENSG00000272620	AFAP1 antisense RNA 1	1.16157	0.0299104
PRKCQ	ENSG00000065675	protein kinase C theta	1.16145	0.0985022
AGPAT4	ENSG00000026652	1-acylglycerol-3-phosphate O-acyltransferase 4	1.16093	0.00123115
HM13-IT1	ENSG00000235313	HM13 intronic transcript 1	1.15911	0.0649286
PNP	ENSG00000198805	purine nucleoside phosphorylase	1.15867	9.58557e-07
USP18	ENSG00000184979	ubiquitin specific peptidase 18	1.15693	0.0173055
STAG3L1	ENSG00000205583	stromal antigen 3-like 1 (pseudogene)	1.15684	0.0467655
STARD10	ENSG00000214530	StAR related lipid transfer domain containing 10	1.15587	0.00211137
TMEM229B	ENSG00000198133	transmembrane protein 229B	1.15109	0.00869362
TRDMT1	ENSG00000107614	tRNA aspartic acid methyltransferase 1	1.14755	0.0280701
RBM8B	ENSG00000258427	RNA binding motif protein 8B pseudogene	1.14617	0.0152429
SFN	ENSG00000175793	stratifin	1.14321	1.58019e-10
GPC4	ENSG00000076716	glypican 4	1.14069	0.00123197
TWIST1	ENSG00000122691	twist family bHLH transcription factor 1	1.13569	2.56656e-06
FJX1	ENSG00000179431	four-jointed box kinase 1	1.13483	7.68456e-05
DDX58	ENSG00000107201	DExD/H-box helicase 58	1.13052	8.64087e-06
RAET1E	ENSG00000164520	retinoic acid early transcript 1E	1.12839	0.0103871
PALS2	ENSG00000105926	membrane palmitoylated protein 6	1.12601	2.47201e-08
MON1A	ENSG00000164077	MON1 homolog A, secretory trafficking associated	1.12515	0.0477425
SAMD4A	ENSG00000020577	sterile alpha motif domain containing 4A	1.12483	0.0202023
GPR160	ENSG00000173890	G protein-coupled receptor 160	1.12341	0.0581425
FABP5	ENSG00000164687	fatty acid binding protein 5	1.12092	2.38618e-06
LRRC61	ENSG00000127399	leucine rich repeat containing 61	1.11976	0.000498273
NETO2	ENSG00000171208	neuropilin and tolloid like 2	1.11875	3.30673e-08
ACTR3C	ENSG00000106526	actin related protein 3C	1.11829	0.0514628
ANKRD29	ENSG00000154065	ankyrin repeat domain 29	1.11802	7.25268e-05
BFSP1	ENSG00000125864	beaded filament structural protein 1	1.118	0.00377027
ITGA1	ENSG00000213949	integrin subunit alpha 1	1.11599	0.0192536
PTK6	ENSG00000101213	protein tyrosine kinase 6	1.11581	2.00667e-13
BSPRY	ENSG00000119411	B-box and SPRY domain containing	1.11579	0.00179646
GPR37	ENSG00000170775	G protein-coupled receptor 37	1.11009	0.0229
SLC16A7	ENSG00000118596	solute carrier family 16 member 7	1.10993	2.42653e-10
CHRNB1	ENSG00000170175	cholinergic receptor nicotinic beta 1 subunit	1.10493	0.00987202
HOXA10-AS	ENSG00000253187	HOXA10 antisense RNA	1.10447	2.22932e-09
RASSF6	ENSG00000169435	Ras association domain family member 6	1.1023	5.38844e-06
KLF9	ENSG00000119138	Kruppel like factor 9	1.10049	0.0157082
MLLT11	ENSG00000213190	MLLT11 transcription factor 7 cofactor	1.09973	0.0585543
PDLIM7	ENSG00000196923	PDZ and LIM domain 7	1.09848	1.63401e-11
TGFB1	ENSG00000105329	transforming growth factor beta 1	1.09789	0.000260542
CDH2	ENSG00000170558	cadherin 2	1.09684	0.00928264
B3GNT3	ENSG00000179913	UDP-GlcNAc:betaGal beta-1,3-N-acetylglucosaminyltransferase 3	1.08848	0.00010931
HERC2P7	ENSG00000274471	hect domain and RLD 2 pseudogene 7	1.08681	0.0184511
RIN1	ENSG00000174791	Ras and Rab interactor 1	1.08478	1.5501e-08
LINC02709	ENSG00000245522	long intergenic non-protein coding RNA 2709	1.08236	0.0987261
DNM3	ENSG00000197959	dynamin 3	1.07948	0.0338029
LAYN	ENSG00000204381	layilin	1.07873	0.0010954
GPR176	ENSG00000166073	G protein-coupled receptor 176	1.07749	0.060244
CYTOR	ENSG00000222041	cytoskeleton regulator RNA	1.07737	0.00149406
DUSP7	ENSG00000164086	dual specificity phosphatase 7	1.07409	5.11132e-08
ERF	ENSG00000105722	ETS2 repressor factor	1.07281	0.000499156
SERPINE1	ENSG00000106366	serpin family E member 1	1.07167	0.00282204
PAQR7	ENSG00000182749	progestin and adipoQ receptor family member 7	1.07044	0.000926998
KRT81	ENSG00000205426	keratin 81	1.06922	0.0767298
HTRA3	ENSG00000170801	HtrA serine peptidase 3	1.06301	0.0161504
DBN1	ENSG00000113758	drebrin 1	1.05238	7.86163e-08
HIC2	ENSG00000169635	HIC ZBTB transcriptional repressor 2	1.04842	7.26548e-06
ARG2	ENSG00000081181	arginase 2	1.04837	0.00397853
SNORA11F	ENSG00000221164	small nucleolar RNA, H/ACA box 11F	1.04769	0.0558381
SNORA80A	ENSG00000200792	small nucleolar RNA, H/ACA box 80A	1.04462	0.0504098
RRS1	ENSG00000179041	ribosome biogenesis regulator 1 homolog	1.04278	0.000147509
TNFRSF12A	ENSG00000006327	TNF receptor superfamily member 12A	1.04154	2.14618e-05
IFFO2	ENSG00000169991	intermediate filament family orphan 2	1.03686	0.0001064
LTBP1	ENSG00000049323	latent transforming growth factor beta binding protein 1	1.03634	0.000230265
LOXL1	ENSG00000129038	lysyl oxidase like 1	1.03368	0.0120565
SMN1	ENSG00000172062	survival of motor neuron 1, telomeric	1.03108	0.0721948
LY6D	ENSG00000167656	lymphocyte antigen 6 family member D	1.03001	8.96976e-05
SACS	ENSG00000151835	sacsin molecular chaperone	1.02533	0.000184775
ARHGEF10	ENSG00000104728	Rho guanine nucleotide exchange factor 10	1.02059	0.036767
MYBL1	ENSG00000185697	MYB proto-oncogene like 1	1.02002	2.12772e-06
CYP27C1	ENSG00000186684	cytochrome P450 family 27 subfamily C member 1	1.01763	0.00295397
ARHGAP45	ENSG00000180448	Rho GTPase activating protein 45	1.01519	0.0191987
HERC5	ENSG00000138646	HECT and RLD domain containing E3 ubiquitin protein ligase 5	1.01353	0.000535219
ANXA3	ENSG00000138772	annexin A3	1.01313	0.00841399
CDC42EP1	ENSG00000128283	CDC42 effector protein 1	1.01172	0.00116869
CHRNA10	ENSG00000129749	cholinergic receptor nicotinic alpha 10 subunit	1.00783	0.0962065
SLX9	ENSG00000160256	family with sequence similarity 207 member A	1.0065	0.000178746
ISG20	ENSG00000172183	interferon stimulated exonuclease gene 20	1.00638	0.00798169
KAZN	ENSG00000189337	kazrin, periplakin interacting protein	1.00275	7.21799e-11
SMTN	ENSG00000183963	smoothelin	0.999178	0.0244413
AL392046.2	ENSG00000283000	long intergenic non-protein coding RNA 2635	0.997556	0.0782857
AKT3	ENSG00000117020	AKT serine/threonine kinase 3	0.996971	0.057823
RASSF8	ENSG00000123094	Ras association domain family member 8	0.996019	0.00186463
TCEAL9	ENSG00000185222	transcription elongation factor A like 9	0.989873	1.13349e-23
GCA	ENSG00000115271	grancalcin	0.98951	0.0292118
ARID3B	ENSG00000179361	AT-rich interaction domain 3B	0.9863	0.0117223
PLEK2	ENSG00000100558	pleckstrin 2	0.985237	0.000469211
FAM181B	ENSG00000182103	family with sequence similarity 181 member B	0.98454	7.62411e-05
CCDC112	ENSG00000164221	coiled-coil domain containing 112	0.981926	7.56229e-05
RNASEH1-AS1	ENSG00000234171	RNASEH1 antisense RNA 1	0.980669	0.0513985
GPATCH4	ENSG00000160818	G-patch domain containing 4	0.979837	6.61441e-07
SLC25A15	ENSG00000102743	solute carrier family 25 member 15	0.978825	0.0677925
AC018868.1	ENSG00000231409	ribosomal protein L36a (RPL36A) pseudogene]	0.978625	0.0898029
TBC1D30	ENSG00000111490	TBC1 domain family member 30	0.978329	0.000189784
SH3TC1	ENSG00000125089	SH3 domain and tetratricopeptide repeats 1	0.978114	0.0490529
TRNP1	ENSG00000253368	TMF1 regulated nuclear protein 1	0.976295	0.000314475
XDH	ENSG00000158125	xanthine dehydrogenase	0.974897	0.00706344
SLC35F2	ENSG00000110660	solute carrier family 35 member F2	0.974765	1.38993e-08
ZNF165	ENSG00000197279	zinc finger protein 165	0.972947	0.0576725
S100A2	ENSG00000196754	S100 calcium binding protein A2	0.971073	6.64291e-10
KLF13	ENSG00000169926	Kruppel like factor 13	0.970268	3.62354e-12
IRF9	ENSG00000213928	interferon regulatory factor 9	0.967527	0.0666579
BAX	ENSG00000087088	BCL2 associated X, apoptosis regulator	0.965526	0.0588589
ATF5	ENSG00000169136	activating transcription factor 5	0.961311	0.000707822
MIR17HG	ENSG00000215417	miR-17-92a-1 cluster host gene	0.960791	0.0737538
GEMIN7	ENSG00000142252	gem nuclear organelle associated protein 7	0.959699	0.00211478
CCDC9	ENSG00000105321	coiled-coil domain containing 9	0.958518	0.0757598
AIFM2	ENSG00000042286	apoptosis inducing factor mitochondria associated 2	0.957153	8.87985e-11
LYAR	ENSG00000145220	Ly1 antibody reactive	0.956626	6.14802e-05
NRG1	ENSG00000157168	neuregulin 1	0.956228	4.34287e-05
ZIC2	ENSG00000043355	Zic family member 2	0.955508	0.000155759
MMP2	ENSG00000087245	matrix metallopeptidase 2	0.955033	0.0208396
SLC37A2	ENSG00000134955	solute carrier family 37 member 2	0.953221	0.00480261
SNORA79B	ENSG00000222489	small nucleolar RNA, H/ACA box 79B	0.952202	0.0154009
OASL	ENSG00000135114	2'-5'-oligoadenylate synthetase like	0.951633	0.0297533
PTPRU	ENSG00000060656	protein tyrosine phosphatase receptor type U	0.951167	0.0130553
SDF2L1	ENSG00000128228	stromal cell derived factor 2 like 1	0.951106	0.000469226
SNORA19	ENSG00000207468	small nucleolar RNA, H/ACA box 19	0.949464	0.00883393
BAK1	ENSG00000030110	BCL2 antagonist/killer 1	0.947599	0.00357541
AK1	ENSG00000106992	adenylate kinase 1	0.946478	0.000549103
NPTXR	ENSG00000221890	neuronal pentraxin receptor	0.940582	0.00037839
PDE5A	ENSG00000138735	phosphodiesterase 5A	0.94038	0.00108435
P2RX5	ENSG00000083454	purinergic receptor P2X 5	0.940079	0.0126157
ZDHHC9	ENSG00000188706	zinc finger DHHC-type palmitoyltransferase 9	0.935815	5.39124e-09
AC243964.3	ENSG00000279095	TEC]	0.928863	0.00912095
CHST11	ENSG00000171310	carbohydrate sulfotransferase 11	0.927303	0.0413145
GSDME	ENSG00000105928	gasdermin E	0.92371	9.51236e-09
SERPINE2	ENSG00000135919	serpin family E member 2	0.923604	1.17193e-08
RPL41P1	ENSG00000227063	ribosomal protein L41 pseudogene 1	0.923192	0.0757598
LAD1	ENSG00000159166	ladinin 1	0.922874	1.9367e-08
TNC	ENSG00000041982	tenascin C	0.920103	0.00849489
PRKCQ-AS1	ENSG00000237943	PRKCQ antisense RNA 1	0.919894	0.0626972
SLC20A1	ENSG00000144136	solute carrier family 20 member 1	0.918968	2.04659e-05
TIMP3	ENSG00000100234	TIMP metallopeptidase inhibitor 3	0.917529	3.00391e-11
CPPED1	ENSG00000103381	calcineurin like phosphoesterase domain containing 1	0.914161	9.44169e-05
PROCR	ENSG00000101000	protein C receptor	0.91373	0.0442242
DKC1	ENSG00000130826	dyskerin pseudouridine synthase 1	0.912666	4.50843e-06
IFIT3	ENSG00000119917	interferon induced protein with tetratricopeptide repeats 3	0.912567	0.023978
AKR1C3	ENSG00000196139	aldo-keto reductase family 1 member C3	0.909283	0.0136898
CHPF	ENSG00000123989	chondroitin polymerizing factor	0.907798	3.55634e-05
POLR3G	ENSG00000113356	RNA polymerase III subunit G	0.907378	0.00882481
PPAN	ENSG00000130810	peter pan homolog	0.906829	0.00347291
MAP2	ENSG00000078018	microtubule associated protein 2	0.903778	0.00132143
P2RY11	ENSG00000244165	purinergic receptor P2Y11	0.90211	0.0194607
SPOUT1	ENSG00000198917	SPOUT domain containing methyltransferase 1	0.899483	1.49364e-05
AP000350.6	ENSG00000273295	novel transcript]	0.898081	0.0706143
S100A4	ENSG00000196154	S100 calcium binding protein A4	0.89793	0.00221165
CSRP2	ENSG00000175183	cysteine and glycine rich protein 2	0.897263	0.00273072
DDX51	ENSG00000185163	DEAD-box helicase 51	0.896138	0.000579068
PCBP4	ENSG00000090097	poly(rC) binding protein 4	0.896069	0.00583753
SINHCAF	ENSG00000139146	SIN3-HDAC complex associated factor	0.895768	1.86213e-05
SP6	ENSG00000189120	Sp6 transcription factor	0.889636	0.0449275
SLC29A1	ENSG00000112759	solute carrier family 29 member 1 (Augustine blood group)	0.889101	0.00655994
ZBTB20	ENSG00000181722	zinc finger and BTB domain containing 20	0.887734	0.0945505
AUNIP	ENSG00000127423	aurora kinase A and ninein interacting protein	0.88757	0.00513472
RNY4	ENSG00000252316	RNA, Ro60-associated Y4	0.886723	0.0374208
RNF223	ENSG00000237330	ring finger protein 223	0.884846	0.0386487
MAPKBP1	ENSG00000137802	mitogen-activated protein kinase binding protein 1	0.882193	3.29006e-05
CBX2	ENSG00000173894	chromobox 2	0.881827	0.00177976
PPP3R1	ENSG00000221823	protein phosphatase 3 regulatory subunit B, alpha	0.879752	4.04285e-05
CDK5R1	ENSG00000176749	cyclin dependent kinase 5 regulatory subunit 1	0.879556	0.00316069
GRK5	ENSG00000198873	G protein-coupled receptor kinase 5	0.876788	0.0208633
CTSZ	ENSG00000101160	cathepsin Z	0.876581	0.000302189
NLRC5	ENSG00000140853	NLR family CARD domain containing 5	0.872211	0.000740348
LFNG	ENSG00000106003	LFNG O-fucosylpeptide 3-beta-N-acetylglucosaminyltransferase	0.870894	4.77899e-05
ADAM8	ENSG00000151651	ADAM metallopeptidase domain 8	0.86683	0.0366579
IRX2	ENSG00000170561	iroquois homeobox 2	0.864927	3.66697e-12
WDR43	ENSG00000163811	WD repeat domain 43	0.864821	4.95001e-06
NAAA	ENSG00000138744	N-acylethanolamine acid amidase	0.860759	0.0210657
NOP56	ENSG00000101361	NOP56 ribonucleoprotein	0.859662	0.000181491
TAP1	ENSG00000168394	transporter 1, ATP binding cassette subfamily B member	0.859648	5.97952e-07
TNFRSF10D	ENSG00000173530	TNF receptor superfamily member 10d	0.859065	0.0565961
GNL3	ENSG00000163938	G protein nucleolar 3	0.854853	0.000427424
ADRB2	ENSG00000169252	adrenoceptor beta 2	0.854531	0.0111543
UBXN8	ENSG00000104691	UBX domain protein 8	0.852946	0.00304651
HSP90AB3P	ENSG00000183199	heat shock protein 90 alpha family class B member 3, pseudogene	0.851961	0.00294809
SOX15	ENSG00000129194	SRY-box transcription factor 15	0.848403	7.46022e-08
FLNA	ENSG00000196924	filamin A	0.847496	3.57846e-08
TRAM2	ENSG00000065308	translocation associated membrane protein 2	0.846907	0.00175066
PIM1	ENSG00000137193	Pim-1 proto-oncogene, serine/threonine kinase	0.846188	0.0374901
MRTO4	ENSG00000053372	MRT4 homolog, ribosome maturation factor	0.846166	0.000337582
HOXA13	ENSG00000106031	homeobox A13	0.842989	0.00706406
SNHG15	ENSG00000232956	small nucleolar RNA host gene 15	0.839798	0.00134335
GATA2	ENSG00000179348	GATA binding protein 2	0.838236	0.00940172
GSE1	ENSG00000131149	Gse1 coiled-coil protein	0.838148	8.68874e-06
B3GAT3	ENSG00000149541	beta-1,3-glucuronyltransferase 3	0.837109	0.0334643
SLC15A3	ENSG00000110446	solute carrier family 15 member 3	0.834187	0.00806324
ACTN1	ENSG00000072110	actinin alpha 1	0.832165	1.61468e-10
FIGN	ENSG00000182263	fidgetin, microtubule severing factor	0.832076	0.000305677
ARHGAP29	ENSG00000137962	Rho GTPase activating protein 29	0.831303	0.000109868
NTRK2	ENSG00000148053	neurotrophic receptor tyrosine kinase 2	0.831162	0.0246055
SHMT2	ENSG00000182199	serine hydroxymethyltransferase 2	0.830064	3.76204e-08
BAG2	ENSG00000112208	BAG cochaperone 2	0.829855	0.0088246
FNDC3A	ENSG00000102531	fibronectin type III domain containing 3A	0.828827	1.42307e-06
FRMD4A	ENSG00000151474	FERM domain containing 4A	0.828435	0.000130326
AIM2	ENSG00000163568	absent in melanoma 2	0.82678	0.000169145
TPM2	ENSG00000198467	tropomyosin 2	0.825642	0.000157611
PKP3	ENSG00000184363	plakophilin 3	0.822793	0.00140988
S1PR2	ENSG00000267534	sphingosine-1-phosphate receptor 2	0.822783	0.0341295
SLC16A3	ENSG00000141526	solute carrier family 16 member 3	0.821981	0.00673899
LRRC8E	ENSG00000171017	leucine rich repeat containing 8 VRAC subunit E	0.818861	0.000342464
DRAM1	ENSG00000136048	DNA damage regulated autophagy modulator 1	0.818734	0.0110023
ARID3A	ENSG00000116017	AT-rich interaction domain 3A	0.81814	0.00839754
GPATCH3	ENSG00000198746	G-patch domain containing 3	0.817002	0.00928547
JPH1	ENSG00000104369	junctophilin 1	0.816196	0.0211475
SURF6	ENSG00000148296	surfeit 6	0.811696	1.37297e-09
SOX4	ENSG00000124766	SRY-box transcription factor 4	0.810592	1.52904e-05
PCF11-AS1	ENSG00000269939	PCF11 antisense RNA 1	0.810571	0.0742143
SIRPA	ENSG00000198053	signal regulatory protein alpha	0.810138	0.00028862
NLE1	ENSG00000073536	notchless homolog 1	0.810097	0.0138219
GRWD1	ENSG00000105447	glutamate rich WD repeat containing 1	0.809488	0.000427926
PLEKHG5	ENSG00000171680	pleckstrin homology and RhoGEF domain containing G5	0.809204	0.00481219
IER5L	ENSG00000188483	immediate early response 5 like	0.807579	0.00767649
NLRP1	ENSG00000091592	NLR family pyrin domain containing 1	0.807562	0.0312848
AL139385.1	ENSG00000275880	novel transcript, antisense to CARKD]	0.807431	0.0111514
AGTRAP	ENSG00000177674	angiotensin II receptor associated protein	0.806995	4.668e-05
FZD2	ENSG00000180340	frizzled class receptor 2	0.804147	0.0797282
RRP9	ENSG00000114767	ribosomal RNA processing 9, U3 small nucleolar RNA binding protein	0.802969	0.00713593
NPR3	ENSG00000113389	natriuretic peptide receptor 3	0.802771	0.0212669
PAG1	ENSG00000076641	phosphoprotein membrane anchor with glycosphingolipid microdomains 1	0.798992	0.0322481
RF00003	ENSG00000274428	RNA, variant U1 small nuclear 25	0.798666	0.0405771
STK17A	ENSG00000164543	serine/threonine kinase 17a	0.79858	9.40732e-12
ZNF593	ENSG00000142684	zinc finger protein 593	0.796763	2.84262e-06
NCL	ENSG00000115053	nucleolin	0.795725	1.09242e-05
PUM3	ENSG00000080608	pumilio RNA binding family member 3	0.794292	6.13844e-07
SPRED1	ENSG00000166068	sprouty related EVH1 domain containing 1	0.794261	0.000794461
KCP	ENSG00000135253	kielin cysteine rich BMP regulator	0.793955	0.0576725
INKA1	ENSG00000185614	inka box actin regulator 1	0.793488	0.0295336
UGT8	ENSG00000174607	UDP glycosyltransferase 8	0.793264	0.00176882
WNT3A	ENSG00000154342	Wnt family member 3A	0.790402	0.00273933
TIMM8A	ENSG00000126953	translocase of inner mitochondrial membrane 8A	0.790175	0.000740762
UNC13D	ENSG00000092929	unc-13 homolog D	0.788479	0.0757598
TLCD4	ENSG00000152078	TLC domain containing 4	0.787505	0.00954159
HILPDA	ENSG00000135245	hypoxia inducible lipid droplet associated	0.784454	8.87361e-06
BCOR	ENSG00000183337	BCL6 corepressor	0.783239	1.80686e-07
NRG4	ENSG00000169752	neuregulin 4	0.782411	0.0735948
NSUN5	ENSG00000130305	NOP2/Sun RNA methyltransferase 5	0.781513	2.24452e-06
PES1	ENSG00000100029	pescadillo ribosomal biogenesis factor 1	0.781489	0.00378438
TMEM131L	ENSG00000121210	transmembrane 131 like	0.780418	0.000303475
AC108693.1	ENSG00000239280	pseudogene similar to part of dihydrolipoamide branched chain transacylase E2 DBT]	0.778215	0.0176486
TNFRSF10A	ENSG00000104689	TNF receptor superfamily member 10a	0.777524	0.00189718
EIF3J	ENSG00000104131	eukaryotic translation initiation factor 3 subunit J	0.775455	2.31376e-07
TSSC4	ENSG00000184281	tumor suppressing subtransferable candidate 4	0.774361	0.000617882
TMEM97	ENSG00000109084	transmembrane protein 97	0.774071	5.10638e-06
IGFBP7	ENSG00000163453	insulin like growth factor binding protein 7	0.771835	0.00249611
TRMT61A	ENSG00000166166	tRNA methyltransferase 61A	0.770968	0.00348928
SLC39A4	ENSG00000147804	solute carrier family 39 member 4	0.769291	0.000479583
TOR4A	ENSG00000198113	torsin family 4 member A	0.767182	0.000485617
RAET1G	ENSG00000203722	retinoic acid early transcript 1G	0.764711	0.0757544
RASSF1	ENSG00000068028	Ras association domain family member 1	0.763441	0.0832883
TRMT1	ENSG00000104907	tRNA methyltransferase 1	0.763098	0.00552763
NRARP	ENSG00000198435	NOTCH regulated ankyrin repeat protein	0.762878	0.00744855
EMC3-AS1	ENSG00000180385	EMC3 antisense RNA 1	0.762272	0.00480261
DMD	ENSG00000198947	dystrophin	0.762181	0.0777004
AC097263.1	ENSG00000228519	RANBP1 pseudogene 1	0.760579	0.0363482
SPAG1	ENSG00000104450	sperm associated antigen 1	0.759253	0.000399295
RPGR	ENSG00000156313	retinitis pigmentosa GTPase regulator	0.758274	0.0774182
ANKRD13B	ENSG00000198720	ankyrin repeat domain 13B	0.75816	0.0607743
HACD1	ENSG00000165996	3-hydroxyacyl-CoA dehydratase 1	0.756987	0.017406
COBL	ENSG00000106078	cordon-bleu WH2 repeat protein	0.756959	0.0287123
CBLC	ENSG00000142273	Cbl proto-oncogene C	0.756951	0.0766889
TUBBP5	ENSG00000159247	tubulin beta pseudogene 5	0.755877	0.00483262
IMPDH1	ENSG00000106348	inosine monophosphate dehydrogenase 1	0.755873	0.000536371
OSBPL10	ENSG00000144645	oxysterol binding protein like 10	0.755682	0.000178219
MAP3K21	ENSG00000143674	mitogen-activated protein kinase kinase kinase 21	0.75301	0.0106504
LPAR3	ENSG00000171517	lysophosphatidic acid receptor 3	0.750728	0.000446835
PADI1	ENSG00000142623	peptidyl arginine deiminase 1	0.750487	0.0254518
RCAN1	ENSG00000159200	regulator of calcineurin 1	0.749017	0.000178223
RANGAP1	ENSG00000100401	Ran GTPase activating protein 1	0.74889	5.34637e-06
SLC6A8	ENSG00000130821	solute carrier family 6 member 8	0.747478	0.0101509
SLC7A8	ENSG00000092068	solute carrier family 7 member 8	0.747224	0.0084433
NRIP3	ENSG00000175352	nuclear receptor interacting protein 3	0.746881	0.0263373
CLSPN	ENSG00000092853	claspin	0.746047	0.00013666
RAB32	ENSG00000118508	RAB32, member RAS oncogene family	0.745743	0.000640751
PTRH1	ENSG00000187024	peptidyl-tRNA hydrolase 1 homolog	0.745466	0.00295802
TAGLN2	ENSG00000158710	transgelin 2	0.745281	0.000178421
AP1S1	ENSG00000106367	adaptor related protein complex 1 subunit sigma 1	0.745111	0.0131894
LPIN1	ENSG00000134324	lipin 1	0.742907	0.0454115
HPCAL1	ENSG00000115756	hippocalcin like 1	0.742794	0.00252517
MICAL2	ENSG00000133816	microtubule associated monooxygenase, calponin and LIM domain containing 2	0.741759	0.028403
RPUSD1	ENSG00000007376	RNA pseudouridine synthase domain containing 1	0.741673	0.00066509
MLX	ENSG00000108788	MAX dimerization protein MLX	0.737714	2.65857e-06
FGF2	ENSG00000138685	fibroblast growth factor 2	0.736902	0.00599129
MPZL2	ENSG00000149573	myelin protein zero like 2	0.735454	0.00138365
HSPD1	ENSG00000144381	heat shock protein family D (Hsp60) member 1	0.735334	0.000107479
MICB	ENSG00000204516	MHC class I polypeptide-related sequence B	0.734997	0.0428853
B3GNT2	ENSG00000170340	UDP-GlcNAc:betaGal beta-1,3-N-acetylglucosaminyltransferase 2	0.734407	0.00129489
DIAPH3	ENSG00000139734	diaphanous related formin 3	0.733308	6.40814e-05
EPHA1	ENSG00000146904	EPH receptor A1	0.733202	0.0198279
ZMYND19	ENSG00000165724	zinc finger MYND-type containing 19	0.733032	0.00542807
RCL1	ENSG00000120158	RNA terminal phosphate cyclase like 1	0.732185	0.000667504
HS3ST1	ENSG00000002587	heparan sulfate-glucosamine 3-sulfotransferase 1	0.730763	0.00213448
RRBP1	ENSG00000125844	ribosome binding protein 1	0.729954	1.70278e-06
KCTD11	ENSG00000213859	potassium channel tetramerization domain containing 11	0.729625	0.0395232
PHLDA3	ENSG00000174307	pleckstrin homology like domain family A member 3	0.727675	0.000457095
ATAD3A	ENSG00000197785	ATPase family AAA domain containing 3A	0.727316	0.00245507
LPIN2	ENSG00000101577	lipin 2	0.725652	0.00483262
ABL2	ENSG00000143322	ABL proto-oncogene 2, non-receptor tyrosine kinase	0.725619	0.030859
DDX21	ENSG00000165732	DExD-box helicase 21	0.723998	0.00037458
SAMHD1	ENSG00000101347	SAM and HD domain containing deoxynucleoside triphosphate triphosphohydrolase 1	0.721624	0.00569877
SLC2A6	ENSG00000160326	solute carrier family 2 member 6	0.721589	0.0214109
BOP1	ENSG00000261236	BOP1 ribosomal biogenesis factor	0.721575	0.00551115
ATAD3B	ENSG00000160072	ATPase family AAA domain containing 3B	0.721193	0.0342915
RAB11FIP2	ENSG00000107560	RAB11 family interacting protein 2	0.721107	0.000344721
TRIM7	ENSG00000146054	tripartite motif containing 7	0.720996	0.0521144
BTG3	ENSG00000154640	BTG anti-proliferation factor 3	0.72084	0.000336508
AC020916.1	ENSG00000267519	miR-23a/27a/24-2 cluster host gene	0.719548	4.04541e-08
PMAIP1	ENSG00000141682	phorbol-12-myristate-13-acetate-induced protein 1	0.719163	7.06937e-05
MAP4K4	ENSG00000071054	mitogen-activated protein kinase kinase kinase kinase 4	0.71423	4.25276e-06
PHLDB1	ENSG00000019144	pleckstrin homology like domain family B member 1	0.714086	1.25828e-05
ELOVL1	ENSG00000066322	ELOVL fatty acid elongase 1	0.712503	0.000141671
CSRP1	ENSG00000159176	cysteine and glycine rich protein 1	0.712268	0.00784183
HLA-V	ENSG00000181126	major histocompatibility complex, class I, V (pseudogene)	0.712075	0.0524283
TTLL4	ENSG00000135912	tubulin tyrosine ligase like 4	0.710674	0.00812994
SLC4A7	ENSG00000033867	solute carrier family 4 member 7	0.710408	0.000120142
TUBA4A	ENSG00000127824	tubulin alpha 4a	0.71021	0.000448659
ETS1	ENSG00000134954	ETS proto-oncogene 1, transcription factor	0.709867	0.0327461
FAM126A	ENSG00000122591	family with sequence similarity 126 member A	0.708354	1.55241e-09
LRCH1	ENSG00000136141	leucine rich repeats and calponin homology domain containing 1	0.708349	0.00459351
FAM174C	ENSG00000228300	family with sequence similarity 174 member C	0.707244	0.00366282
AUP1	ENSG00000115307	AUP1 lipid droplet regulating VLDL assembly factor	0.707063	1.4707e-05
DNAJC24	ENSG00000170946	DnaJ heat shock protein family (Hsp40) member C24	0.706635	0.0372478
CARD10	ENSG00000100065	caspase recruitment domain family member 10	0.706223	0.00921083
SLC19A1	ENSG00000173638	solute carrier family 19 member 1	0.706166	0.041479
H2AC20	ENSG00000184260	H2A clustered histone 20	0.705355	0.0320308
CDV3	ENSG00000091527	CDV3 homolog	0.704554	0.000132442
ZC3HAV1	ENSG00000105939	zinc finger CCCH-type containing, antiviral 1	0.702477	2.49859e-05
IMP3	ENSG00000177971	IMP U3 small nucleolar ribonucleoprotein 3	0.702034	3.07082e-09
GNL3L	ENSG00000130119	G protein nucleolar 3 like	0.699302	0.0130032
SCARNA22	ENSG00000249784	small Cajal body-specific RNA 22	0.699262	0.0841463
PSMC1	ENSG00000100764	proteasome 26S subunit, ATPase 1	0.697501	3.99501e-05
TOP1	ENSG00000198900	DNA topoisomerase I	0.69746	6.51948e-07
SH2B3	ENSG00000111252	SH2B adaptor protein 3	0.696769	0.0988099
SLC25A19	ENSG00000125454	solute carrier family 25 member 19	0.695622	0.00366463
TCOF1	ENSG00000070814	treacle ribosome biogenesis factor 1	0.694559	0.000575003
LPCAT1	ENSG00000153395	lysophosphatidylcholine acyltransferase 1	0.692045	0.00290211
BCR	ENSG00000186716	BCR activator of RhoGEF and GTPase	0.69152	0.000428109
INCENP	ENSG00000149503	inner centromere protein	0.691375	0.000108405
NOC4L	ENSG00000184967	nucleolar complex associated 4 homolog	0.691301	0.0671429
AP1S2	ENSG00000182287	adaptor related protein complex 1 subunit sigma 2	0.689235	0.00803767
NOC3L	ENSG00000173145	NOC3 like DNA replication regulator	0.686985	5.16534e-06
BCCIP	ENSG00000107949	BRCA2 and CDKN1A interacting protein	0.686808	0.000257721
HR	ENSG00000168453	HR lysine demethylase and nuclear receptor corepressor	0.686404	0.00398174
SSH1	ENSG00000084112	slingshot protein phosphatase 1	0.684488	2.7585e-05
DDX24	ENSG00000089737	DEAD-box helicase 24	0.682986	3.45938e-10
SELENOW	ENSG00000178980	selenoprotein W	0.682338	0.00132143
HSPA5	ENSG00000044574	heat shock protein family A (Hsp70) member 5	0.680976	0.0137448
C15orf39	ENSG00000167173	chromosome 15 open reading frame 39	0.679972	0.00736652
TLE1	ENSG00000196781	TLE family member 1, transcriptional corepressor	0.679522	1.90809e-06
EXOSC4	ENSG00000178896	exosome component 4	0.679362	0.000315016
SNX33	ENSG00000173548	sorting nexin 33	0.679121	0.062023
REPIN1	ENSG00000214022	replication initiator 1	0.678739	0.00182612
PSMC1P1	ENSG00000241506	proteasome 26S subunit, ATPase 1 pseudogene 1	0.67852	0.00676916
MTRF1L	ENSG00000112031	mitochondrial translational release factor 1 like	0.677791	0.0229081
SMS	ENSG00000102172	spermine synthase	0.677438	0.00140158
MT-TF	ENSG00000210049	mitochondrially encoded tRNA-Phe (UUU/C)	0.675457	0.00514057
KCNG1	ENSG00000026559	potassium voltage-gated channel modifier subfamily G member 1	0.675111	0.0664615
RFX3	ENSG00000080298	regulatory factor X3	0.674866	0.0571486
SGSH	ENSG00000181523	N-sulfoglucosamine sulfohydrolase	0.674589	0.086753
NXPE3	ENSG00000144815	neurexophilin and PC-esterase domain family member 3	0.674283	0.0164878
CAPRIN2	ENSG00000110888	caprin family member 2	0.672704	4.6434e-05
ZNF581	ENSG00000171425	zinc finger protein 581	0.671883	0.0047206
SYMPK	ENSG00000125755	symplekin	0.671036	0.0144105
ULBP2	ENSG00000131015	UL16 binding protein 2	0.670777	0.0991893
HOXC10	ENSG00000180818	homeobox C10	0.670734	0.00979835
WDR3	ENSG00000065183	WD repeat domain 3	0.669913	2.60669e-06
C19orf47	ENSG00000160392	chromosome 19 open reading frame 47	0.669667	0.0533828
PXK	ENSG00000168297	PX domain containing serine/threonine kinase like	0.66918	0.0377517
PLS1	ENSG00000120756	plastin 1	0.669103	0.000948676
CD55	ENSG00000196352	CD55 molecule (Cromer blood group)	0.667259	0.0392076
ARPC5L	ENSG00000136950	actin related protein 2/3 complex subunit 5 like	0.66599	8.7179e-10
APBB2	ENSG00000163697	amyloid beta precursor protein binding family B member 2	0.663547	0.0806918
NAPEPLD	ENSG00000161048	N-acyl phosphatidylethanolamine phospholipase D	0.663492	0.0830581
RAP1GDS1	ENSG00000138698	Rap1 GTPase-GDP dissociation stimulator 1	0.662478	0.000266341
LTBR	ENSG00000111321	lymphotoxin beta receptor	0.662364	0.00391339
DUBR	ENSG00000243701	DPPA2 upstream binding RNA	0.661958	0.0270527
NOLC1	ENSG00000166197	nucleolar and coiled-body phosphoprotein 1	0.661247	0.000500786
ETS2	ENSG00000157557	ETS proto-oncogene 2, transcription factor	0.661	1.63944e-05
GRPEL1	ENSG00000109519	GrpE like 1, mitochondrial	0.66036	0.000740311
KRT14	ENSG00000186847	keratin 14	0.658683	0.0267689
AMD1	ENSG00000123505	adenosylmethionine decarboxylase 1	0.658387	2.08956e-06
ITGA3	ENSG00000005884	integrin subunit alpha 3	0.658217	0.00643843
ODC1	ENSG00000115758	ornithine decarboxylase 1	0.656405	0.0723211
UTP14A	ENSG00000156697	UTP14A small subunit processome component	0.655133	6.32541e-05
PDCL3	ENSG00000115539	phosducin like 3	0.654331	0.0208418
H2BC4	ENSG00000180596	H2B clustered histone 4	0.654118	0.0952027
ATP10D	ENSG00000145246	ATPase phospholipid transporting 10D (putative)	0.64947	0.00066509
HMGA2	ENSG00000149948	high mobility group AT-hook 2	0.649225	0.00319432
NOP9	ENSG00000196943	NOP9 nucleolar protein	0.64912	0.033431
STON2	ENSG00000140022	stonin 2	0.648795	0.00099517
FXR2	ENSG00000129245	FMR1 autosomal homolog 2	0.648705	0.000155759
DDHD1	ENSG00000100523	DDHD domain containing 1	0.647522	0.0124759
DOHH	ENSG00000129932	deoxyhypusine hydroxylase	0.647211	0.0496243
TNPO1	ENSG00000083312	transportin 1	0.646519	7.01598e-06
SHROOM3	ENSG00000138771	shroom family member 3	0.645263	0.00066509
PHF23	ENSG00000040633	PHD finger protein 23	0.644753	0.00321111
PLP2	ENSG00000102007	proteolipid protein 2	0.643971	0.000148511
RRP12	ENSG00000052749	ribosomal RNA processing 12 homolog	0.643147	0.00761801
EPPK1	ENSG00000261150	epiplakin 1	0.641731	0.0270809
MIR222HG	ENSG00000270069	miR222/221 cluster host gene	0.641572	0.0498751
IER2	ENSG00000160888	immediate early response 2	0.640412	0.00119087
VDR	ENSG00000111424	vitamin D receptor	0.640068	0.000745731
RRP1B	ENSG00000160208	ribosomal RNA processing 1B	0.640015	0.000178095
GPER1	ENSG00000164850	G protein-coupled estrogen receptor 1	0.640007	0.0784364
TTC26	ENSG00000105948	tetratricopeptide repeat domain 26	0.639217	0.00270802
KIZ	ENSG00000088970	kizuna centrosomal protein	0.638627	0.00560157
MSX2	ENSG00000120149	msh homeobox 2	0.638249	0.068018
PLEKHF1	ENSG00000166289	pleckstrin homology and FYVE domain containing 1	0.636645	0.000108674
MISP	ENSG00000099812	mitotic spindle positioning	0.636329	0.0338225
SNAPC4	ENSG00000165684	small nuclear RNA activating complex polypeptide 4	0.636222	0.00312676
RPS6KA1	ENSG00000117676	ribosomal protein S6 kinase A1	0.636106	0.0015028
CKMT1B	ENSG00000237289	creatine kinase, mitochondrial 1B	0.634672	0.0559678
SRPK2	ENSG00000135250	SRSF protein kinase 2	0.631869	1.13136e-06
MSN	ENSG00000147065	moesin	0.631542	2.65823e-14
DDX55	ENSG00000111364	DEAD-box helicase 55	0.631311	0.00695684
BCL2L1	ENSG00000171552	BCL2 like 1	0.631072	0.034264
PARVB	ENSG00000188677	parvin beta	0.63093	0.0546886
BIK	ENSG00000100290	BCL2 interacting killer	0.629131	0.0227027
RRP1	ENSG00000160214	ribosomal RNA processing 1	0.628057	0.0250706
PTPRE	ENSG00000132334	protein tyrosine phosphatase receptor type E	0.627056	0.00560863
MYO1E	ENSG00000157483	myosin IE	0.626832	0.000403751
BDKRB2	ENSG00000168398	bradykinin receptor B2	0.625447	0.00699988
COL27A1	ENSG00000196739	collagen type XXVII alpha 1 chain	0.624235	0.0124658
GLS	ENSG00000115419	glutaminase	0.622435	9.13047e-08
C12orf75	ENSG00000235162	chromosome 12 open reading frame 75	0.621618	0.000491634
METAP2	ENSG00000111142	methionyl aminopeptidase 2	0.621512	1.34113e-05
PPP6R1	ENSG00000105063	protein phosphatase 6 regulatory subunit 1	0.620853	0.086753
RNF2	ENSG00000121481	ring finger protein 2	0.620706	0.0245868
POLR3D	ENSG00000168495	RNA polymerase III subunit D	0.619817	0.000473645
SHARPIN	ENSG00000179526	SHANK associated RH domain interactor	0.618935	0.0467655
BRMS1	ENSG00000174744	BRMS1 transcriptional repressor and anoikis regulator	0.618294	0.0136912
C2CD2L	ENSG00000172375	C2CD2 like	0.617354	0.0716706
ADAT2	ENSG00000189007	adenosine deaminase tRNA specific 2	0.616515	0.0180969
MSANTD4	ENSG00000170903	Myb/SANT DNA binding domain containing 4 with coiled-coils	0.61603	0.00489657
CBR3	ENSG00000159231	carbonyl reductase 3	0.615616	0.0127907
KCNQ1OT1	ENSG00000269821	KCNQ1 opposite strand/antisense transcript 1	0.614358	0.0144263
PSMA6	ENSG00000100902	proteasome 20S subunit alpha 6	0.614052	0.0827947
QTRT1	ENSG00000213339	queuine tRNA-ribosyltransferase catalytic subunit 1	0.613914	0.087888
NEU3	ENSG00000162139	neuraminidase 3	0.613281	0.0351603
TGFBRAP1	ENSG00000135966	transforming growth factor beta receptor associated protein 1	0.61266	8.69125e-06
LRP5	ENSG00000162337	LDL receptor related protein 5	0.612445	0.0553799
RRP15	ENSG00000067533	ribosomal RNA processing 15 homolog	0.612073	0.00489782
OTUD1	ENSG00000165312	OTU deubiquitinase 1	0.611901	0.0465368
SLC18B1	ENSG00000146409	solute carrier family 18 member B1	0.611622	0.0987261
MFSD12	ENSG00000161091	major facilitator superfamily domain containing 12	0.611397	0.00389781
PLCH2	ENSG00000149527	phospholipase C eta 2	0.61137	0.0469912
MIRLET7A1HG	ENSG00000269929	miRlet-7a-1/let-7f-1/let-7d cluster host gene	0.611123	0.0870399
LYPD3	ENSG00000124466	LY6/PLAUR domain containing 3	0.611026	0.0173055
AC068491.4	ENSG00000279191		0.610848	0.0443477
CHRNA5	ENSG00000169684	cholinergic receptor nicotinic alpha 5 subunit	0.610277	0.0140167
PLEC	ENSG00000178209	plectin	0.608154	0.0061812
MIIP	ENSG00000116691	migration and invasion inhibitory protein	0.607255	0.0588595
TICAM1	ENSG00000127666	toll like receptor adaptor molecule 1	0.606811	0.0847938
DHX37	ENSG00000150990	DEAH-box helicase 37	0.60674	0.0378595
PABPC4	ENSG00000090621	poly(A) binding protein cytoplasmic 4	0.606603	0.00153894
NFKB2	ENSG00000077150	nuclear factor kappa B subunit 2	0.606548	0.0123559
PDCD11	ENSG00000148843	programmed cell death 11	0.604812	6.81141e-05
CCND1	ENSG00000110092	cyclin D1	0.604215	0.0266121
NCAPH2	ENSG00000025770	non-SMC condensin II complex subunit H2	0.6041	0.0180969
PRKAG1	ENSG00000181929	protein kinase AMP-activated non-catalytic subunit gamma 1	0.604071	0.00304651
TRABD	ENSG00000170638	TraB domain containing	0.603986	3.83731e-07
AGTPBP1	ENSG00000135049	ATP/GTP binding protein 1	0.601241	0.097599
EPB41L4B	ENSG00000095203	erythrocyte membrane protein band 4.1 like 4B	0.600868	0.0190445
PTMA	ENSG00000187514	prothymosin alpha	0.600565	0.00037458
ST6GALNAC4	ENSG00000136840	ST6 N-acetylgalactosaminide alpha-2,6-sialyltransferase 4	0.600476	0.0590708
L3MBTL3	ENSG00000198945	L3MBTL histone methyl-lysine binding protein 3	0.600347	0.0381611
SLC36A1	ENSG00000123643	solute carrier family 36 member 1	0.599124	0.00454412
FPGS	ENSG00000136877	folylpolyglutamate synthase	0.597777	0.000605306
AC012360.3	ENSG00000272994	C2orf49 divergent transcript	0.597772	0.0485129
CCP110	ENSG00000103540	centriolar coiled-coil protein 110	0.596736	2.13166e-05
NLN	ENSG00000123213	neurolysin	0.596545	0.000811994
H4C3	ENSG00000197061	H4 clustered histone 3	0.596168	0.0152683
IMP4	ENSG00000136718	IMP U3 small nucleolar ribonucleoprotein 4	0.595907	0.0027962
SPA17	ENSG00000064199	sperm autoantigenic protein 17	0.595146	0.0629762
E2F7	ENSG00000165891	E2F transcription factor 7	0.594544	0.00384186
HOXA9	ENSG00000078399	homeobox A9	0.593414	0.0778267
INF2	ENSG00000203485	inverted formin 2	0.593235	0.00521422
C12orf4	ENSG00000047621	chromosome 12 open reading frame 4	0.593114	0.00592302
METTL1	ENSG00000037897	methyltransferase like 1	0.592948	0.0136161
C1orf109	ENSG00000116922	chromosome 1 open reading frame 109	0.592842	0.0298713
LRFN4	ENSG00000173621	leucine rich repeat and fibronectin type III domain containing 4	0.592473	0.0742954
RHOC	ENSG00000155366	ras homolog family member C	0.591985	0.0358917
UCK2	ENSG00000143179	uridine-cytidine kinase 2	0.591825	0.00477869
PIP5K1A	ENSG00000143398	phosphatidylinositol-4-phosphate 5-kinase type 1 alpha	0.591692	6.73953e-08
ANKRD10	ENSG00000088448	ankyrin repeat domain 10	0.591197	0.0189326
MALT1	ENSG00000172175	MALT1 paracaspase	0.590847	0.0176603
TTLL12	ENSG00000100304	tubulin tyrosine ligase like 12	0.589966	0.000586134
DNAJC7	ENSG00000168259	DnaJ heat shock protein family (Hsp40) member C7	0.589418	0.00018499
COA7	ENSG00000162377	cytochrome c oxidase assembly factor 7	0.588846	0.00190143
MYBBP1A	ENSG00000132382	MYB binding protein 1a	0.588814	0.00429099
ZNF142	ENSG00000115568	zinc finger protein 142	0.588201	0.0790696
MED24	ENSG00000008838	mediator complex subunit 24	0.587638	0.000423895
STEAP3	ENSG00000115107	STEAP3 metalloreductase	0.587476	0.0734721
SLC16A1	ENSG00000155380	solute carrier family 16 member 1	0.587159	2.61757e-07
AMBRA1	ENSG00000110497	autophagy and beclin 1 regulator 1	0.587113	0.053127
ACSL5	ENSG00000197142	acyl-CoA synthetase long chain family member 5	0.586535	0.0616405
GEMIN5	ENSG00000082516	gem nuclear organelle associated protein 5	0.586399	0.00455445
PODXL	ENSG00000128567	podocalyxin like	0.586392	0.0799152
SH3KBP1	ENSG00000147010	SH3 domain containing kinase binding protein 1	0.586359	0.00251148
GIT1	ENSG00000108262	GIT ArfGAP 1	0.585639	0.00107372
FSTL1	ENSG00000163430	follistatin like 1	0.58556	0.0118477
SLC52A2	ENSG00000185803	solute carrier family 52 member 2	0.584687	0.00452075
ANKRD22	ENSG00000152766	ankyrin repeat domain 22	0.584107	0.0351868
ARMC6	ENSG00000105676	armadillo repeat containing 6	0.582668	0.0164155
LINP1	ENSG00000223784	lncRNA in non-homologous end joining pathway 1	0.582481	0.0776357
CD276	ENSG00000103855	CD276 molecule	0.58161	0.00306553
EFNB1	ENSG00000090776	ephrin B1	0.581254	0.000237713
NR2F6	ENSG00000160113	nuclear receptor subfamily 2 group F member 6	0.580899	0.000608812
RAB11FIP1	ENSG00000156675	RAB11 family interacting protein 1	0.580552	0.000392688
SPATA5	ENSG00000145375	spermatogenesis associated 5	0.579756	0.00288335
FAM241A	ENSG00000174749	family with sequence similarity 241 member A	0.579398	0.0418556
MRPS2	ENSG00000122140	mitochondrial ribosomal protein S2	0.578191	0.00139235
GPAT4	ENSG00000158669	glycerol-3-phosphate acyltransferase 4	0.57807	0.0270778
MCM10	ENSG00000065328	minichromosome maintenance 10 replication initiation factor	0.5779	0.0072472
WDR46	ENSG00000227057	WD repeat domain 46	0.576107	0.0409853
CEP83	ENSG00000173588	centrosomal protein 83	0.576078	0.0107385
GLCCI1	ENSG00000106415	glucocorticoid induced 1	0.57574	0.0954217
PCNX2	ENSG00000135749	pecanex 2	0.57515	0.0324308
ANKRD17	ENSG00000132466	ankyrin repeat domain 17	0.574823	4.21439e-05
MICALL2	ENSG00000164877	MICAL like 2	0.574814	0.000634731
DHX33	ENSG00000005100	DEAH-box helicase 33	0.574797	0.0075033
THBD	ENSG00000178726	thrombomodulin	0.574442	0.0506515
RNF216P1	ENSG00000196204	ring finger protein 216 pseudogene 1	0.573102	0.000479583
GTF2E2	ENSG00000197265	general transcription factor IIE subunit 2	0.572923	0.000241696
NAV2	ENSG00000166833	neuron navigator 2	0.57213	0.0246108
CKB	ENSG00000166165	creatine kinase B	0.570625	0.00296993
RPS6KB2	ENSG00000175634	ribosomal protein S6 kinase B2	0.569012	0.0210161
TRIAP1	ENSG00000170855	TP53 regulated inhibitor of apoptosis 1	0.568836	0.00193134
KLC2	ENSG00000174996	kinesin light chain 2	0.567533	0.0571486
BUD23	ENSG00000071462	BUD23 rRNA methyltransferase and ribosome maturation factor	0.566179	0.0285873
CHTF8; DERPC	ENSG00000168802	chromosome transmission fidelity factor 8	0.56488	0.00824498
LIMK2	ENSG00000182541	LIM domain kinase 2	0.564081	2.65857e-06
IPPK	ENSG00000127080	inositol-pentakisphosphate 2-kinase	0.562464	0.0166199
KRT18	ENSG00000111057	keratin 18	0.56241	0.0403048
RFWD3	ENSG00000168411	ring finger and WD repeat domain 3	0.56222	1.65171e-05
THUMPD2	ENSG00000138050	THUMP domain containing 2	0.562072	0.0172572
GTPBP4	ENSG00000107937	GTP binding protein 4	0.561929	9.7574e-05
TYRO3	ENSG00000092445	TYRO3 protein tyrosine kinase	0.561827	0.0487759
JADE1	ENSG00000077684	jade family PHD finger 1	0.561294	0.0264202
SNHG9	ENSG00000255198	small nucleolar RNA host gene 9	0.55998	0.00440168
GSPT1	ENSG00000103342	G1 to S phase transition 1	0.559612	2.2903e-05
TBL2	ENSG00000106638	transducin beta like 2	0.559424	0.036606
BYSL	ENSG00000112578	bystin like	0.559115	0.07067
CRY1	ENSG00000008405	cryptochrome circadian regulator 1	0.558874	0.0454493
PNO1	ENSG00000115946	partner of NOB1 homolog	0.557784	0.00949919
TRIM47	ENSG00000132481	tripartite motif containing 47	0.557664	0.0401659
RAB23	ENSG00000112210	RAB23, member RAS oncogene family	0.557608	0.0905603
NAMPT	ENSG00000105835	nicotinamide phosphoribosyltransferase	0.557273	0.00113968
ARFGEF1	ENSG00000066777	ADP ribosylation factor guanine nucleotide exchange factor 1	0.557132	0.000480052
TIMP1	ENSG00000102265	TIMP metallopeptidase inhibitor 1	0.556528	0.0282251
HMGA1	ENSG00000137309	high mobility group AT-hook 1	0.555978	0.00327976
SP110	ENSG00000135899	SP110 nuclear body protein	0.55587	0.0351856
DUOX1	ENSG00000137857	dual oxidase 1	0.555518	0.0838779
TCEAL8	ENSG00000180964	transcription elongation factor A like 8	0.554783	0.0208396
USP36	ENSG00000055483	ubiquitin specific peptidase 36	0.554759	0.000889196
SKIL	ENSG00000136603	SKI like proto-oncogene	0.554264	1.50578e-05
RPF1	ENSG00000117133	ribosome production factor 1 homolog	0.554238	1.8504e-06
UBTF	ENSG00000108312	upstream binding transcription factor	0.55331	0.00150864
DBR1	ENSG00000138231	debranching RNA lariats 1	0.553244	0.00649535
TNFAIP1	ENSG00000109079	TNF alpha induced protein 1	0.5532	0.000273474
SRPX2	ENSG00000102359	sushi repeat containing protein X-linked 2	0.552369	0.0721233
MIR4435-2HG	ENSG00000172965	MIR4435-2 host gene	0.552049	0.0972295
EIF5A2	ENSG00000163577	eukaryotic translation initiation factor 5A2	0.551517	0.0262977
PFDN6	ENSG00000204220	prefoldin subunit 6	0.551323	0.0307318
FTSJ3	ENSG00000108592	FtsJ RNA 2'-O-methyltransferase 3	0.551228	0.00101482
SFXN4	ENSG00000183605	sideroflexin 4	0.550675	0.0309928
OGFOD1	ENSG00000087263	2-oxoglutarate and iron dependent oxygenase domain containing 1	0.549856	0.000901909
NOS1AP	ENSG00000198929	nitric oxide synthase 1 adaptor protein	0.549516	0.0511699
FLAD1	ENSG00000160688	flavin adenine dinucleotide synthetase 1	0.548355	0.00389781
RHOBTB2	ENSG00000008853	Rho related BTB domain containing 2	0.547558	0.0489292
KLHDC4	ENSG00000104731	kelch domain containing 4	0.547377	0.0213607
AVPI1	ENSG00000119986	arginine vasopressin induced 1	0.546139	0.0440218
PTAFR	ENSG00000169403	platelet activating factor receptor	0.544459	0.00483262
SLC25A37	ENSG00000147454	solute carrier family 25 member 37	0.543215	0.00173047
RAB8A	ENSG00000167461	RAB8A, member RAS oncogene family	0.542189	0.000197454
PAK1IP1	ENSG00000111845	PAK1 interacting protein 1	0.541847	0.0506402
PABPN1	ENSG00000100836	poly(A) binding protein nuclear 1	0.541637	0.0713274
MAD2L2	ENSG00000116670	mitotic arrest deficient 2 like 2	0.541347	0.0883935
DRAP1	ENSG00000175550	DR1 associated protein 1	0.541157	0.0258819
B3GALNT1	ENSG00000169255	beta-1,3-N-acetylgalactosaminyltransferase 1 (globoside blood group)	0.540309	0.0802625
SLFN12	ENSG00000172123	schlafen family member 12	0.539969	0.0334643
NTMT1	ENSG00000148335	N-terminal Xaa-Pro-Lys N-methyltransferase 1	0.539883	0.0123794
AHCY	ENSG00000101444	adenosylhomocysteinase	0.539811	5.77393e-05
TFAP4	ENSG00000090447	transcription factor AP-4	0.539461	0.0144442
PDPN	ENSG00000162493	podoplanin	0.539238	0.00931565
SNHG8	ENSG00000269893	small nucleolar RNA host gene 8	0.53921	0.00281527
CMSS1	ENSG00000184220	cms1 ribosomal small subunit homolog	0.53869	0.0270778
MAP7D3	ENSG00000129680	MAP7 domain containing 3	0.538385	0.0110093
SRRD	ENSG00000100104	SRR1 domain containing	0.537986	0.012646
MIDN	ENSG00000167470	midnolin	0.537908	0.00599129
TSPAN5	ENSG00000168785	tetraspanin 5	0.537717	0.000540344
BUB1	ENSG00000169679	BUB1 mitotic checkpoint serine/threonine kinase	0.537668	0.0070557
NOP16	ENSG00000048162	NOP16 nucleolar protein	0.537345	0.0259613
ZC3H15	ENSG00000065548	zinc finger CCCH-type containing 15	0.537111	1.5908e-05
NCLN	ENSG00000125912	nicalin	0.536783	0.015694
IL13RA1	ENSG00000131724	interleukin 13 receptor subunit alpha 1	0.535965	0.00244836
AC245060.4	ENSG00000272779	BMS1, ribosome biogenesis factor (BSM1) pseudogene]	0.534999	0.0673041
UCHL5	ENSG00000116750	ubiquitin C-terminal hydrolase L5	0.534276	0.000437879
ADGRE5	ENSG00000123146	adhesion G protein-coupled receptor E5	0.53426	0.0374279
PTRH2	ENSG00000141378	peptidyl-tRNA hydrolase 2	0.534225	0.020591
ATP11C	ENSG00000101974	ATPase phospholipid transporting 11C	0.53415	0.0310852
SESN2	ENSG00000130766	sestrin 2	0.533431	0.000740348
ZNF587B	ENSG00000269343	zinc finger protein 587B	0.533077	0.0250237
RRP8	ENSG00000132275	ribosomal RNA processing 8	0.532926	0.0230828
PRR11	ENSG00000068489	proline rich 11	0.532898	0.0190571
PRPF4	ENSG00000136875	pre-mRNA processing factor 4	0.531482	0.00383291
NME1	ENSG00000239672	NME/NM23 nucleoside diphosphate kinase 1	0.531191	0.0173138
SYNJ1	ENSG00000159082	synaptojanin 1	0.53029	0.0222756
SNHG1	ENSG00000255717	small nucleolar RNA host gene 1	0.530112	0.0523388
SIRT7	ENSG00000187531	sirtuin 7	0.529745	0.0139004
PMM2	ENSG00000140650	phosphomannomutase 2	0.529617	0.00116276
FARSA	ENSG00000179115	phenylalanyl-tRNA synthetase subunit alpha	0.529514	0.000999532
TIMM13	ENSG00000099800	translocase of inner mitochondrial membrane 13	0.529072	0.0230492
ABCF1	ENSG00000204574	ATP binding cassette subfamily F member 1	0.528937	0.000125841
SLC39A7	ENSG00000112473	solute carrier family 39 member 7	0.528737	0.0875726
NIFK	ENSG00000155438	nucleolar protein interacting with the FHA domain of MKI67	0.528714	0.00673899
HMOX2	ENSG00000103415	heme oxygenase 2	0.528698	0.000272436
BRD9	ENSG00000028310	bromodomain containing 9	0.528287	0.00226506
ZFP36L2	ENSG00000152518	ZFP36 ring finger protein like 2	0.527688	0.018619
ABCE1	ENSG00000164163	ATP binding cassette subfamily E member 1	0.527676	0.00265746
ALYREF	ENSG00000183684	Aly/REF export factor	0.527218	0.0312271
SSX2IP	ENSG00000117155	SSX family member 2 interacting protein	0.526126	0.000261909
CWC22	ENSG00000163510	CWC22 spliceosome associated protein homolog	0.525789	1.0414e-05
B2M	ENSG00000166710	beta-2-microglobulin	0.525671	0.00165647
PM20D2	ENSG00000146281	peptidase M20 domain containing 2	0.525136	0.004303
SMAP2	ENSG00000084070	small ArfGAP2	0.525008	0.0297571
SAP30BP	ENSG00000161526	SAP30 binding protein	0.524617	0.00386027
KDM2A	ENSG00000173120	lysine demethylase 2A	0.52422	0.0175284
GRINA	ENSG00000178719	glutamate ionotropic receptor NMDA type subunit associated protein 1	0.522643	0.0900391
ZFP64	ENSG00000020256	ZFP64 zinc finger protein	0.521204	0.0173055
NCEH1	ENSG00000144959	neutral cholesterol ester hydrolase 1	0.521172	0.00357541
TOB2	ENSG00000183864	transducer of ERBB2, 2	0.520875	0.00309351
TRAPPC4	ENSG00000196655	trafficking protein particle complex 4	0.52019	0.00294597
AGPAT5	ENSG00000155189	1-acylglycerol-3-phosphate O-acyltransferase 5	0.518839	0.00437811
RAPH1	ENSG00000173166	Ras association (RalGDS/AF-6) and pleckstrin homology domains 1	0.517269	0.0741772
IFRD2	ENSG00000214706	interferon related developmental regulator 2	0.517023	0.0234032
RANBP6	ENSG00000137040	RAN binding protein 6	0.516995	0.00764211
C12orf57	ENSG00000111678	chromosome 12 open reading frame 57	0.516356	0.0798606
SMURF2	ENSG00000108854	SMAD specific E3 ubiquitin protein ligase 2	0.516274	0.0104147
DUSP16	ENSG00000111266	dual specificity phosphatase 16	0.516243	0.0862166
HSP90AB1	ENSG00000096384	heat shock protein 90 alpha family class B member 1	0.516115	0.0017777
UBAP2	ENSG00000137073	ubiquitin associated protein 2	0.515148	0.000652928
EIF2B2	ENSG00000119718	eukaryotic translation initiation factor 2B subunit beta	0.513896	0.007535
HOXC6	ENSG00000197757	homeobox C6	0.512631	0.00551115
TFAP2A	ENSG00000137203	transcription factor AP-2 alpha	0.512504	0.00232657
E2F3	ENSG00000112242	E2F transcription factor 3	0.512429	0.000779903
HMGXB3	ENSG00000113716	HMG-box containing 3	0.512221	0.0231168
POP1	ENSG00000104356	POP1 homolog, ribonuclease P/MRP subunit	0.511676	0.000724469
PA2G4	ENSG00000170515	proliferation-associated 2G4	0.511616	0.0168782
UBE2Q2	ENSG00000140367	ubiquitin conjugating enzyme E2 Q2	0.511541	0.0251204
SMIM30	ENSG00000214194	small integral membrane protein 30	0.511441	0.0552166
CBX3	ENSG00000122565	chromobox 3	0.51135	4.7643e-07
INTS13	ENSG00000064102	integrator complex subunit 13	0.511091	1.66216e-05
SPDL1	ENSG00000040275	spindle apparatus coiled-coil protein 1	0.510887	0.0198939
PDK1	ENSG00000152256	pyruvate dehydrogenase kinase 1	0.509757	0.0591535
SUPT16H	ENSG00000092201	SPT16 homolog, facilitates chromatin remodeling subunit	0.509505	2.12449e-05
EZH2	ENSG00000106462	enhancer of zeste 2 polycomb repressive complex 2 subunit	0.50919	0.00159867
SPOP	ENSG00000121067	speckle type BTB/POZ protein	0.508815	0.000132442
CPT1A	ENSG00000110090	carnitine palmitoyltransferase 1A	0.508219	0.00404548
FAM98A	ENSG00000119812	family with sequence similarity 98 member A	0.50808	0.0072472
SMG7	ENSG00000116698	SMG7 nonsense mediated mRNA decay factor	0.507686	0.000829327
CKS2	ENSG00000123975	CDC28 protein kinase regulatory subunit 2	0.507676	0.000186327
DCAF17	ENSG00000115827	DDB1 and CUL4 associated factor 17	0.507408	0.0434055
TRIB3	ENSG00000101255	tribbles pseudokinase 3	0.507347	0.0117195
MED8	ENSG00000159479	mediator complex subunit 8	0.50683	0.0202146
POLE3	ENSG00000148229	DNA polymerase epsilon 3, accessory subunit	0.50625	0.0067385
NEK6	ENSG00000119408	NIMA related kinase 6	0.505708	0.00522304
AC090498.1	ENSG00000279483	ribosomal protein L41 (RPL41) pseudogene]	0.505515	0.0649782
ARL2BP	ENSG00000102931	ADP ribosylation factor like GTPase 2 binding protein	0.505448	0.000211813
CENPL	ENSG00000120334	centromere protein L	0.505202	0.0784012
PNPT1	ENSG00000138035	polyribonucleotide nucleotidyltransferase 1	0.505094	0.0121741
CDC25A	ENSG00000164045	cell division cycle 25A	0.504526	0.0998876
WDR91	ENSG00000105875	WD repeat domain 91	0.504128	0.0163711
USO1	ENSG00000138768	USO1 vesicle transport factor	0.503659	0.00125165
PTER	ENSG00000165983	phosphotriesterase related	0.502814	0.0888936
TARBP2	ENSG00000139546	TARBP2 subunit of RISC loading complex	0.502	0.0240747
CDK11B	ENSG00000248333	cyclin dependent kinase 11B	0.501998	0.0192579
DYNC1I2	ENSG00000077380	dynein cytoplasmic 1 intermediate chain 2	0.499916	0.00458268
EPB41L4A-AS1	ENSG00000224032	EPB41L4A antisense RNA 1	0.499602	0.0534838
LOXL2	ENSG00000134013	lysyl oxidase like 2	0.499444	0.0713604
SHLD2	ENSG00000122376	shieldin complex subunit 2	0.4991	0.0165205
DDX18	ENSG00000088205	DEAD-box helicase 18	0.49842	0.000915542
MAK16	ENSG00000198042	MAK16 homolog	0.498303	0.0546473
ARHGAP24	ENSG00000138639	Rho GTPase activating protein 24	0.497956	0.0989326
STUB1	ENSG00000103266	STIP1 homology and U-box containing protein 1	0.497413	0.00705411
XRCC2	ENSG00000196584	X-ray repair cross complementing 2	0.497402	0.0247429
AC007342.5	ENSG00000262714	novel transcript]	0.497223	0.0741731
KIF16B	ENSG00000089177	kinesin family member 16B	0.495813	0.0109668
RBM25	ENSG00000119707	RNA binding motif protein 25	0.495049	5.48807e-05
LPAR1	ENSG00000198121	lysophosphatidic acid receptor 1	0.494281	0.0339414
AFAP1L2	ENSG00000169129	actin filament associated protein 1 like 2	0.493312	0.00428872
RANBP1	ENSG00000099901	RAN binding protein 1	0.493241	0.00290211
SRA1	ENSG00000213523	steroid receptor RNA activator 1	0.493206	0.010644
LDLRAD3	ENSG00000179241	low density lipoprotein receptor class A domain containing 3	0.492782	0.0576725
WDR55	ENSG00000120314	WD repeat domain 55	0.492215	0.0259613
PPM1G	ENSG00000115241	protein phosphatase, Mg2+/Mn2+ dependent 1G	0.492036	0.000294209
DNAJC10	ENSG00000077232	DnaJ heat shock protein family (Hsp40) member C10	0.491261	0.00886276
KIF1C	ENSG00000129250	kinesin family member 1C	0.490617	0.00777242
CDC6	ENSG00000094804	cell division cycle 6	0.490579	0.0155037
LSM2	ENSG00000204392	LSM2 homolog, U6 small nuclear RNA and mRNA degradation associated	0.490329	0.0158188
GATAD2A	ENSG00000167491	GATA zinc finger domain containing 2A	0.489935	0.00847804
PPAT	ENSG00000128059	phosphoribosyl pyrophosphate amidotransferase	0.489729	0.0185687
SNHG16	ENSG00000163597	small nucleolar RNA host gene 16	0.488508	0.0404493
PINX1	ENSG00000254093	PIN2 (TERF1) interacting telomerase inhibitor 1	0.4881	0.0988099
RHOD	ENSG00000173156	ras homolog family member D	0.486923	0.0337432
SEL1L3	ENSG00000091490	SEL1L family member 3	0.486617	0.0387989
REEP4	ENSG00000168476	receptor accessory protein 4	0.486516	0.0745659
EIF2B3	ENSG00000070785	eukaryotic translation initiation factor 2B subunit gamma	0.486514	0.0207678
RETREG1	ENSG00000154153	reticulophagy regulator 1	0.486398	0.0753034
ZNHIT6	ENSG00000117174	zinc finger HIT-type containing 6	0.485824	0.0144633
KAT2A	ENSG00000108773	lysine acetyltransferase 2A	0.485479	0.0664836
FTL	ENSG00000087086	ferritin light chain	0.484727	0.0192754
PET117	ENSG00000232838	PET117 cytochrome c oxidase chaperone	0.484274	0.0964315
GJB3	ENSG00000188910	gap junction protein beta 3	0.483538	0.0821209
DUS1L	ENSG00000169718	dihydrouridine synthase 1 like	0.483214	0.001151
MAD1L1	ENSG00000002822	mitotic arrest deficient 1 like 1	0.483082	0.0703514
AURKA	ENSG00000087586	aurora kinase A	0.482854	0.0310569
RABEP1	ENSG00000029725	rabaptin, RAB GTPase binding effector protein 1	0.482797	0.000302189
RASSF9	ENSG00000198774	Ras association domain family member 9	0.482719	0.0907887
BCAS4	ENSG00000124243	breast carcinoma amplified sequence 4	0.482503	0.00954159
MROH6	ENSG00000204839	maestro heat like repeat family member 6	0.482344	0.0378595
SLC16A1-AS1	ENSG00000226419	SLC16A1 antisense RNA 1	0.482025	0.0454091
ZNF121	ENSG00000197961	zinc finger protein 121	0.481867	0.00545225
ZNF532	ENSG00000074657	zinc finger protein 532	0.481579	0.0899541
IPO5	ENSG00000065150	importin 5	0.481043	0.00127082
BZW1	ENSG00000082153	basic leucine zipper and W2 domains 1	0.479708	0.00757046
PPP1R12B	ENSG00000077157	protein phosphatase 1 regulatory subunit 12B	0.479676	0.0997479
MRPS30	ENSG00000112996	mitochondrial ribosomal protein S30	0.47908	0.0236951
THADA	ENSG00000115970	THADA armadillo repeat containing	0.478937	0.00979896
AKT1S1	ENSG00000204673	AKT1 substrate 1	0.478836	0.0470777
TOP2A	ENSG00000131747	DNA topoisomerase II alpha	0.478429	0.000947336
UBE3C	ENSG00000009335	ubiquitin protein ligase E3C	0.477897	6.54015e-05
NSMF	ENSG00000165802	NMDA receptor synaptonuclear signaling and neuronal migration factor	0.477501	0.0777364
VCL	ENSG00000035403	vinculin	0.477474	4.98245e-05
GNPNAT1	ENSG00000100522	glucosamine-phosphate N-acetyltransferase 1	0.476809	0.00116276
RTL10	ENSG00000215012	retrotransposon Gag like 10	0.476534	0.0475153
CCDC137	ENSG00000185298	coiled-coil domain containing 137	0.476405	0.00227224
MRM2	ENSG00000122687	mitochondrial rRNA methyltransferase 2	0.473814	0.00150638
RIOK1	ENSG00000124784	RIO kinase 1	0.473685	0.0236951
UTP18	ENSG00000011260	UTP18 small subunit processome component	0.473466	0.0279445
PSMC3IP	ENSG00000131470	PSMC3 interacting protein	0.472997	0.0980564
SDAD1	ENSG00000198301	SDA1 domain containing 1	0.472748	0.0102486
RPL41	ENSG00000229117	ribosomal protein L41	0.472307	0.0699661
ETF1	ENSG00000120705	eukaryotic translation termination factor 1	0.472025	0.000115797
SBDS	ENSG00000126524	SBDS ribosome maturation factor	0.471893	0.00301089
NAA10	ENSG00000102030	N-alpha-acetyltransferase 10, NatA catalytic subunit	0.471357	0.00553771
IPO7	ENSG00000205339	importin 7	0.471244	8.22115e-05
EEF1D	ENSG00000104529	eukaryotic translation elongation factor 1 delta	0.471086	0.00321406
CNOT10	ENSG00000182973	CCR4-NOT transcription complex subunit 10	0.471023	0.052753
HSPH1	ENSG00000120694	heat shock protein family H (Hsp110) member 1	0.470879	0.00734403
TIMM50	ENSG00000105197	translocase of inner mitochondrial membrane 50	0.470592	0.0195652
TMEM64	ENSG00000180694	transmembrane protein 64	0.470412	0.0910415
GANC	ENSG00000214013	glucosidase alpha, neutral C	0.469709	0.0924839
STIP1	ENSG00000168439	stress induced phosphoprotein 1	0.469646	0.0308846
ZNF787	ENSG00000142409	zinc finger protein 787	0.468677	0.0575543
TASOR2	ENSG00000108021	transcription activation suppressor family member 2	0.467937	0.00270802
PBK	ENSG00000168078	PDZ binding kinase	0.467836	0.00394715
THG1L	ENSG00000113272	tRNA-histidine guanylyltransferase 1 like	0.467776	0.0109507
COTL1	ENSG00000103187	coactosin like F-actin binding protein 1	0.467762	0.0978974
SEC61A1	ENSG00000058262	SEC61 translocon subunit alpha 1	0.465769	0.000788921
HSP90AA1	ENSG00000080824	heat shock protein 90 alpha family class A member 1	0.465356	0.0105912
RBM28	ENSG00000106344	RNA binding motif protein 28	0.464821	0.0291976
TSR3	ENSG00000007520	TSR3 ribosome maturation factor	0.4642	0.0340054
RBM19	ENSG00000122965	RNA binding motif protein 19	0.46411	0.00588763
ANLN	ENSG00000011426	anillin actin binding protein	0.463932	0.0330371
PBDC1	ENSG00000102390	polysaccharide biosynthesis domain containing 1	0.463447	0.00392405
AMOTL2	ENSG00000114019	angiomotin like 2	0.463263	0.0353924
MRM3	ENSG00000171861	mitochondrial rRNA methyltransferase 3	0.462833	0.0456756
DBF4	ENSG00000006634	DBF4 zinc finger	0.462147	0.00116869
EIF2AK4	ENSG00000128829	eukaryotic translation initiation factor 2 alpha kinase 4	0.461892	0.0110031
XRCC4	ENSG00000152422	X-ray repair cross complementing 4	0.460815	0.00933755
PUF60	ENSG00000179950	poly(U) binding splicing factor 60	0.460753	0.00692691
TWNK	ENSG00000107815	twinkle mtDNA helicase	0.460126	0.0357033
MGAT5	ENSG00000152127	alpha-1,6-mannosylglycoprotein 6-beta-N-acetylglucosaminyltransferase	0.458892	0.0310512
CLPB	ENSG00000162129	caseinolytic mitochondrial matrix peptidase chaperone subunit B	0.45882	0.0188804
MAFK	ENSG00000198517	MAF bZIP transcription factor K	0.458616	0.00237875
CDCA7L	ENSG00000164649	cell division cycle associated 7 like	0.458611	0.000141925
DNTTIP2	ENSG00000067334	deoxynucleotidyltransferase terminal interacting protein 2	0.458221	0.00145334
NFXL1	ENSG00000170448	nuclear transcription factor, X-box binding like 1	0.457929	0.0255071
BAZ1B	ENSG00000009954	bromodomain adjacent to zinc finger domain 1B	0.457644	0.00133334
SMU1	ENSG00000122692	SMU1 DNA replication regulator and spliceosomal factor	0.45751	0.0208396
FLOT2	ENSG00000132589	flotillin 2	0.457251	0.0721233
CYTH3	ENSG00000008256	cytohesin 3	0.457094	0.0191611
CDK2	ENSG00000123374	cyclin dependent kinase 2	0.456752	0.000701966
CETN3	ENSG00000153140	centrin 3	0.456041	0.0445263
ZWILCH	ENSG00000174442	zwilch kinetochore protein	0.456027	0.0208799
ALG11	ENSG00000253710	ALG11 alpha-1,2-mannosyltransferase	0.455775	0.0977361
EPC2	ENSG00000135999	enhancer of polycomb homolog 2	0.455344	0.0188478
RSL1D1	ENSG00000171490	ribosomal L1 domain containing 1	0.454941	0.0575543
UBN1	ENSG00000118900	ubinuclein 1	0.454699	0.0011146
HSPA8	ENSG00000109971	heat shock protein family A (Hsp70) member 8	0.454565	0.0194096
IER5	ENSG00000162783	immediate early response 5	0.454208	0.0069193
C8orf33	ENSG00000182307	chromosome 8 open reading frame 33	0.454015	0.0103854
FUBP1	ENSG00000162613	far upstream element binding protein 1	0.453568	0.00145334
KPNA4	ENSG00000186432	karyopherin subunit alpha 4	0.453058	4.06534e-05
METRNL	ENSG00000176845	meteorin like, glial cell differentiation regulator	0.453021	0.0205231
TPX2	ENSG00000088325	TPX2 microtubule nucleation factor	0.452821	0.0075599
GJB5	ENSG00000189280	gap junction protein beta 5	0.452632	0.0723211
ZPR1	ENSG00000109917	ZPR1 zinc finger	0.452502	0.0282937
CHORDC1	ENSG00000110172	cysteine and histidine rich domain containing 1	0.452354	0.0234449
BAG5	ENSG00000166170	BAG cochaperone 5	0.452329	0.000100758
SURF2	ENSG00000148291	surfeit 2	0.452321	0.0759209
C11orf24	ENSG00000171067	chromosome 11 open reading frame 24	0.452085	0.0870399
YDJC	ENSG00000161179	YdjC chitooligosaccharide deacetylase homolog	0.45159	0.0339414
TAOK3	ENSG00000135090	TAO kinase 3	0.451524	0.00011019
RARS1	ENSG00000113643	arginyl-tRNA synthetase 1	0.451513	0.00510753
URB1	ENSG00000142207	URB1 ribosome biogenesis homolog	0.449947	0.0488883
RBM38	ENSG00000132819	RNA binding motif protein 38	0.449883	0.00201108
TBC1D2	ENSG00000095383	TBC1 domain family member 2	0.449328	0.00895685
CCNF	ENSG00000162063	cyclin F	0.448925	0.0683779
TMEM209	ENSG00000146842	transmembrane protein 209	0.448755	0.0423417
MAGOH	ENSG00000162385	mago homolog, exon junction complex subunit	0.448731	0.00432955
L3MBTL2	ENSG00000100395	L3MBTL histone methyl-lysine binding protein 2	0.448289	0.0769535
WWC2	ENSG00000151718	WW and C2 domain containing 2	0.447966	0.0150699
GRSF1	ENSG00000132463	G-rich RNA sequence binding factor 1	0.447712	0.00149615
APEX2	ENSG00000169188	apurinic/apyrimidinic endodeoxyribonuclease 2	0.447117	0.0290286
RPUSD4	ENSG00000165526	RNA pseudouridine synthase D4	0.447039	0.076254
IRAK1	ENSG00000184216	interleukin 1 receptor associated kinase 1	0.446879	0.0151337
TEAD1	ENSG00000187079	TEA domain transcription factor 1	0.44681	0.00582343
RPL36A	ENSG00000241343	ribosomal protein L36a	0.446584	0.0184998
TSR1	ENSG00000167721	TSR1 ribosome maturation factor	0.44605	0.0413145
WDR75	ENSG00000115368	WD repeat domain 75	0.445876	0.00722641
QDPR	ENSG00000151552	quinoid dihydropteridine reductase	0.445782	0.0183547
FOXK1	ENSG00000164916	forkhead box K1	0.445745	0.0108338
DNAJC2	ENSG00000105821	DnaJ heat shock protein family (Hsp40) member C2	0.445593	0.0141327
RGS10	ENSG00000148908	regulator of G protein signaling 10	0.444675	0.0510163
GPX1	ENSG00000233276	glutathione peroxidase 1	0.444655	0.00641651
ARAF	ENSG00000078061	A-Raf proto-oncogene, serine/threonine kinase	0.444404	0.0811421
NSUN2	ENSG00000037474	NOP2/Sun RNA methyltransferase 2	0.444309	0.0869603
PKMYT1	ENSG00000127564	protein kinase, membrane associated tyrosine/threonine 1	0.443953	0.0208799
B4GALT3	ENSG00000158850	beta-1,4-galactosyltransferase 3	0.442849	0.087881
NCAPH	ENSG00000121152	non-SMC condensin I complex subunit H	0.442422	0.0124229
SNX24	ENSG00000064652	sorting nexin 24	0.44233	0.0832657
PAF1	ENSG00000006712	PAF1 homolog, Paf1/RNA polymerase II complex component	0.442326	0.0297856
SRFBP1	ENSG00000151304	serum response factor binding protein 1	0.442304	0.00446238
HEATR3	ENSG00000155393	HEAT repeat containing 3	0.441454	0.0856917
URGCP	ENSG00000106608	upregulator of cell proliferation	0.441019	0.0197686
PEBP1	ENSG00000089220	phosphatidylethanolamine binding protein 1	0.440299	0.00146837
BIN1	ENSG00000136717	bridging integrator 1	0.439937	0.0903687
SLC5A3	ENSG00000198743	solute carrier family 5 member 3	0.439923	0.00623665
YWHAH	ENSG00000128245	tyrosine 3-monooxygenase/tryptophan 5-monooxygenase activation protein eta	0.439705	0.0130861
SNRNP27	ENSG00000124380	small nuclear ribonucleoprotein U4/U6.U5 subunit 27	0.439629	0.000133987
TAF13	ENSG00000197780	TATA-box binding protein associated factor 13	0.439498	0.0056028
NUP58	ENSG00000139496	nucleoporin 58	0.438946	0.00751514
PUS7	ENSG00000091127	pseudouridine synthase 7	0.438454	0.0273077
SASS6	ENSG00000156876	SAS-6 centriolar assembly protein	0.437962	0.0192432
AHSA1	ENSG00000100591	activator of HSP90 ATPase activity 1	0.437691	0.0066743
TDG	ENSG00000139372	thymine DNA glycosylase	0.437103	0.0328698
EMG1	ENSG00000126749	EMG1 N1-specific pseudouridine methyltransferase	0.437045	0.0911945
APEH	ENSG00000164062	acylaminoacyl-peptide hydrolase	0.435846	0.018072
ZNF131	ENSG00000172262	zinc finger protein 131	0.43541	0.00115099
EIF6	ENSG00000242372	eukaryotic translation initiation factor 6	0.434819	0.0170093
C12orf43	ENSG00000157895	chromosome 12 open reading frame 43	0.433432	0.0529274
SRBD1	ENSG00000068784	S1 RNA binding domain 1	0.433233	0.00967811
HOMER3	ENSG00000051128	homer scaffold protein 3	0.433031	0.0164552
LIN52	ENSG00000205659	lin-52 DREAM MuvB core complex component	0.43278	0.0394145
POP4	ENSG00000105171	POP4 homolog, ribonuclease P/MRP subunit	0.432655	0.0252737
BCL2L12	ENSG00000126453	BCL2 like 12	0.431497	0.0169879
COMMD8	ENSG00000169019	COMM domain containing 8	0.431216	0.054793
REXO4	ENSG00000148300	REX4 homolog, 3'-5' exonuclease	0.431213	0.00790707
SRRT	ENSG00000087087	serrate, RNA effector molecule	0.430831	0.036031
BEX3	ENSG00000166681	brain expressed X-linked 3	0.430784	0.000545811
EIF3A	ENSG00000107581	eukaryotic translation initiation factor 3 subunit A	0.430636	0.00383999
SARS1	ENSG00000031698	seryl-tRNA synthetase 1	0.430315	0.000230985
MYADM	ENSG00000179820	myeloid associated differentiation marker	0.430115	0.0533828
CCT7	ENSG00000135624	chaperonin containing TCP1 subunit 7	0.429865	0.00320547
DNAJC1	ENSG00000136770	DnaJ heat shock protein family (Hsp40) member C1	0.429466	0.000601191
SLC66A2	ENSG00000122490	solute carrier family 66 member 2	0.429198	0.0206421
CARD6	ENSG00000132357	caspase recruitment domain family member 6	0.428766	0.0364512
RBL1	ENSG00000080839	RB transcriptional corepressor like 1	0.428641	0.0059775
WDR36	ENSG00000134987	WD repeat domain 36	0.428595	0.00918135
BCAP29	ENSG00000075790	B cell receptor associated protein 29	0.42834	0.00153958
ODR4	ENSG00000157181	odr-4 GPCR localization factor homolog	0.428184	0.0150708
ACTB	ENSG00000075624	actin beta	0.427476	0.0194096
C11orf68	ENSG00000175573	chromosome 11 open reading frame 68	0.427186	0.0368911
SPATS2	ENSG00000123352	spermatogenesis associated serine rich 2	0.426961	0.00598906
PSMG1	ENSG00000183527	proteasome assembly chaperone 1	0.426928	0.0134991
RBMX	ENSG00000147274	RNA binding motif protein X-linked	0.426864	0.0282651
CHPF2	ENSG00000033100	chondroitin polymerizing factor 2	0.426706	0.0388444
ING2	ENSG00000168556	inhibitor of growth family member 2	0.426432	0.0217498
PRPF18	ENSG00000165630	pre-mRNA processing factor 18	0.425806	0.0822416
MPDU1	ENSG00000129255	mannose-P-dolichol utilization defect 1	0.425471	0.058672
FAM110A	ENSG00000125898	family with sequence similarity 110 member A	0.425383	0.0358099
RPF2	ENSG00000197498	ribosome production factor 2 homolog	0.425098	0.0713274
DDX3Y	ENSG00000067048	DEAD-box helicase 3 Y-linked	0.42492	0.0107215
UTP20	ENSG00000120800	UTP20 small subunit processome component	0.424479	0.0386487
RPN1	ENSG00000163902	ribophorin I	0.424365	0.00230885
DDX10	ENSG00000178105	DEAD-box helicase 10	0.424363	0.0633047
DYNC1H1	ENSG00000197102	dynein cytoplasmic 1 heavy chain 1	0.424197	0.000178746
TUBB4B	ENSG00000188229	tubulin beta 4B class IVb	0.423789	0.0234449
EEF2	ENSG00000167658	eukaryotic translation elongation factor 2	0.423687	4.48785e-06
ZNF276	ENSG00000158805	zinc finger protein 276	0.422997	0.0732128
PELP1	ENSG00000141456	proline, glutamate and leucine rich protein 1	0.42223	0.0181167
CAMSAP2	ENSG00000118200	calmodulin regulated spectrin associated protein family member 2	0.421761	0.00357541
SMC1A	ENSG00000072501	structural maintenance of chromosomes 1A	0.421644	0.00252517
TMBIM1	ENSG00000135926	transmembrane BAX inhibitor motif containing 1	0.421442	0.00737294
IRS1	ENSG00000169047	insulin receptor substrate 1	0.421278	0.0109668
NEK2	ENSG00000117650	NIMA related kinase 2	0.421088	0.0198915
ME2	ENSG00000082212	malic enzyme 2	0.419998	0.0210145
WBP11	ENSG00000084463	WW domain binding protein 11	0.41992	0.00112592
AMMECR1L	ENSG00000144233	AMMECR1 like	0.419863	0.0749594
RBPJ	ENSG00000168214	recombination signal binding protein for immunoglobulin kappa J region	0.419763	1.52058e-05
CCT6A	ENSG00000146731	chaperonin containing TCP1 subunit 6A	0.419744	0.00692691
PRMT1	ENSG00000126457	protein arginine methyltransferase 1	0.418302	0.0206421
CD82	ENSG00000085117	CD82 molecule	0.418114	0.0651898
EXOSC9	ENSG00000123737	exosome component 9	0.416786	0.0677412
TATDN2	ENSG00000157014	TatD DNase domain containing 2	0.415227	0.0438957
BMS1	ENSG00000165733	BMS1 ribosome biogenesis factor	0.415162	0.000580678
RCOR1	ENSG00000089902	REST corepressor 1	0.414985	0.000914227
ZHX3	ENSG00000174306	zinc fingers and homeoboxes 3	0.414554	0.0652034
LMNB1	ENSG00000113368	lamin B1	0.413477	0.00018704
TCF12	ENSG00000140262	transcription factor 12	0.412917	0.00133434
RHOG	ENSG00000177105	ras homolog family member G	0.412613	0.0150907
TES	ENSG00000135269	testin LIM domain protein	0.412583	0.000730554
LETM1	ENSG00000168924	leucine zipper and EF-hand containing transmembrane protein 1	0.412455	0.0178397
TMEM33	ENSG00000109133	transmembrane protein 33	0.412321	0.00590888
QTRT2	ENSG00000151576	queuine tRNA-ribosyltransferase accessory subunit 2	0.411962	0.0088246
GOLIM4	ENSG00000173905	golgi integral membrane protein 4	0.411125	0.00133769
NPM3	ENSG00000107833	nucleophosmin/nucleoplasmin 3	0.410776	0.0322558
RPS9	ENSG00000170889	ribosomal protein S9	0.410597	0.0080214
TYW3	ENSG00000162623	tRNA-yW synthesizing protein 3 homolog	0.41049	0.00425054
KIFC1	ENSG00000237649	kinesin family member C1	0.409975	0.0256325
WDR12	ENSG00000138442	WD repeat domain 12	0.409625	0.0232203
ESF1	ENSG00000089048	ESF1 nucleolar pre-rRNA processing protein homolog	0.409312	0.0101509
NMD3	ENSG00000169251	NMD3 ribosome export adaptor	0.40905	0.000332026
EIF1AX	ENSG00000173674	eukaryotic translation initiation factor 1A X-linked	0.408399	0.0121741
LLPH	ENSG00000139233	LLP homolog, long-term synaptic facilitation factor	0.407666	0.059187
UTP3	ENSG00000132467	UTP3 small subunit processome component	0.407664	0.0615519
EIF3B	ENSG00000106263	eukaryotic translation initiation factor 3 subunit B	0.407514	0.00162237
PLEKHG3	ENSG00000126822	pleckstrin homology and RhoGEF domain containing G3	0.407443	0.00559076
TOB1	ENSG00000141232	transducer of ERBB2, 1	0.4068	0.0768605
NOP14	ENSG00000087269	NOP14 nucleolar protein	0.406377	0.0352117
TIMM17A	ENSG00000134375	translocase of inner mitochondrial membrane 17A	0.406258	0.00859576
PITRM1	ENSG00000107959	pitrilysin metallopeptidase 1	0.405971	0.00612408
ASAP1	ENSG00000153317	ArfGAP with SH3 domain, ankyrin repeat and PH domain 1	0.405547	0.00522366
MRPS26	ENSG00000125901	mitochondrial ribosomal protein S26	0.405392	0.0743359
TMA16	ENSG00000198498	translation machinery associated 16 homolog	0.405318	0.00432578
MRFAP1L1	ENSG00000178988	Morf4 family associated protein 1 like 1	0.404968	0.0872351
PSMG4	ENSG00000180822	proteasome assembly chaperone 4	0.404732	0.0296705
NOL10	ENSG00000115761	nucleolar protein 10	0.404654	0.0836205
POLR3B	ENSG00000013503	RNA polymerase III subunit B	0.404276	0.0601085
USP16	ENSG00000156256	ubiquitin specific peptidase 16	0.403341	0.00192159
WDR4	ENSG00000160193	WD repeat domain 4	0.402801	0.0496243
EIF5B	ENSG00000158417	eukaryotic translation initiation factor 5B	0.402511	0.0030968
NOL8	ENSG00000198000	nucleolar protein 8	0.402202	0.00396218
TPD52L2	ENSG00000101150	TPD52 like 2	0.402195	0.0192003
PGGT1B	ENSG00000164219	protein geranylgeranyltransferase type I subunit beta	0.401653	0.0258304
PPP1R10	ENSG00000204569	protein phosphatase 1 regulatory subunit 10	0.401163	0.0620047
MRPS25	ENSG00000131368	mitochondrial ribosomal protein S25	0.40115	0.0482556
METTL8	ENSG00000123600	methyltransferase like 8	0.400415	0.00215089
MAP2K3	ENSG00000034152	mitogen-activated protein kinase kinase 3	0.400199	0.0346578
PPP2R2A	ENSG00000221914	protein phosphatase 2 regulatory subunit Balpha	0.400112	0.00336037
CTNNBL1	ENSG00000132792	catenin beta like 1	0.399852	0.0206387
SCLT1	ENSG00000151466	sodium channel and clathrin linker 1	0.399087	0.0809884
BIN3	ENSG00000147439	bridging integrator 3	0.399045	0.0374901
UTP23	ENSG00000147679	UTP23 small subunit processome component	0.398996	0.0345273
CLTB	ENSG00000175416	clathrin light chain B	0.398106	0.0552167
DDRGK1	ENSG00000198171	DDRGK domain containing 1	0.39762	0.0757598
POP7	ENSG00000172336	POP7 homolog, ribonuclease P/MRP subunit	0.396464	0.05282
SHCBP1	ENSG00000171241	SHC binding and spindle associated 1	0.39642	0.0841166
SRRM1	ENSG00000133226	serine and arginine repetitive matrix 1	0.395096	0.000450907
NUDT22	ENSG00000149761	nudix hydrolase 22	0.395082	0.0554836
OXSR1	ENSG00000172939	oxidative stress responsive kinase 1	0.394752	0.0237881
POM121C	ENSG00000272391	POM121 transmembrane nucleoporin C	0.394271	0.0478248
ANKLE2	ENSG00000176915	ankyrin repeat and LEM domain containing 2	0.394029	0.000158585
BRIX1	ENSG00000113460	biogenesis of ribosomes BRX1	0.393531	0.0505648
MTHFD2	ENSG00000065911	methylenetetrahydrofolate dehydrogenase (NADP+ dependent) 2, methenyltetrahydrofolate cyclohydrolase	0.392545	0.094951
DDX49	ENSG00000105671	DEAD-box helicase 49	0.392418	0.0620313
MAT2A	ENSG00000168906	methionine adenosyltransferase 2A	0.391829	0.0382402
RPS14	ENSG00000164587	ribosomal protein S14	0.391638	0.00202858
TET3	ENSG00000187605	tet methylcytosine dioxygenase 3	0.391364	0.0753034
ZNF106	ENSG00000103994	zinc finger protein 106	0.389602	0.000340826
CGAS	ENSG00000164430	cyclic GMP-AMP synthase	0.389577	0.0407371
SFSWAP	ENSG00000061936	splicing factor SWAP	0.38953	0.000707505
MDM2	ENSG00000135679	MDM2 proto-oncogene	0.389457	0.00215395
TPM3	ENSG00000143549	tropomyosin 3	0.389352	0.0118477
SRP72	ENSG00000174780	signal recognition particle 72	0.389101	0.00549256
PPP4R2	ENSG00000163605	protein phosphatase 4 regulatory subunit 2	0.389049	0.0040876
NAA15	ENSG00000164134	N-alpha-acetyltransferase 15, NatA auxiliary subunit	0.388943	0.00467075
FASTKD2	ENSG00000118246	FAST kinase domains 2	0.388806	0.0650718
EIF4E2	ENSG00000135930	eukaryotic translation initiation factor 4E family member 2	0.388596	0.000579408
TMEM38B	ENSG00000095209	transmembrane protein 38B	0.38858	0.0841463
PKP4	ENSG00000144283	plakophilin 4	0.387792	0.0026526
TSEN54	ENSG00000182173	tRNA splicing endonuclease subunit 54	0.387613	0.0982096
NOM1	ENSG00000146909	nucleolar protein with MIF4G domain 1	0.387391	0.0625435
PPP1R9B	ENSG00000108819	protein phosphatase 1 regulatory subunit 9B	0.387238	0.0349873
CLPTM1L	ENSG00000049656	CLPTM1 like	0.387202	0.00319432
TLNRD1	ENSG00000140406	talin rod domain containing 1	0.387176	0.0520697
SRPK1	ENSG00000096063	SRSF protein kinase 1	0.386913	0.00107372
SNX9	ENSG00000130340	sorting nexin 9	0.386577	0.046672
TAP2	ENSG00000204267	transporter 2, ATP binding cassette subfamily B member	0.386115	0.012135
KRBOX5	ENSG00000197302	zinc finger protein 720	0.385827	0.04942
ZNF830	ENSG00000198783	zinc finger protein 830	0.385428	0.0486942
UPF2	ENSG00000151461	UPF2 regulator of nonsense mediated mRNA decay	0.385357	0.0243523
VDAC1	ENSG00000213585	voltage dependent anion channel 1	0.384618	1.86213e-05
PRPF38B	ENSG00000134186	pre-mRNA processing factor 38B	0.384076	0.000266301
SART3	ENSG00000075856	spliceosome associated factor 3, U4/U6 recycling protein	0.383889	0.00456274
ZNF598	ENSG00000167962	zinc finger protein 598, E3 ubiquitin ligase	0.383738	0.0066743
CXADR	ENSG00000154639	CXADR Ig-like cell adhesion molecule	0.383642	0.00112679
UTP11	ENSG00000183520	UTP11 small subunit processome component	0.38332	0.0155018
COBLL1	ENSG00000082438	cordon-bleu WH2 repeat protein like 1	0.383239	0.00883393
ABHD11	ENSG00000106077	abhydrolase domain containing 11	0.382847	0.0571486
MRPS11	ENSG00000181991	mitochondrial ribosomal protein S11	0.38251	0.0674797
ABLIM1	ENSG00000099204	actin binding LIM protein 1	0.382278	0.00110349
MOCOS	ENSG00000075643	molybdenum cofactor sulfurase	0.382191	0.0888936
RSPRY1	ENSG00000159579	ring finger and SPRY domain containing 1	0.381103	0.0541783
INIP	ENSG00000148153	INTS3 and NABP interacting protein	0.381047	0.00940911
TOMM7	ENSG00000196683	translocase of outer mitochondrial membrane 7	0.380897	1.91565e-06
POLR1B	ENSG00000125630	RNA polymerase I subunit B	0.380334	0.0515377
OPA3	ENSG00000125741	outer mitochondrial membrane lipid metabolism regulator OPA3	0.379975	0.0677925
GTF3C5	ENSG00000148308	general transcription factor IIIC subunit 5	0.37933	0.0198277
CTPS1	ENSG00000171793	CTP synthase 1	0.379007	0.0772427
STAT3	ENSG00000168610	signal transducer and activator of transcription 3	0.377629	0.00451527
DOT1L	ENSG00000104885	DOT1 like histone lysine methyltransferase	0.377477	0.0758544
PPP1R14B	ENSG00000173457	protein phosphatase 1 regulatory inhibitor subunit 14B	0.376979	0.027323
ZCCHC17	ENSG00000121766	zinc finger CCHC-type containing 17	0.376717	0.0115925
CABIN1	ENSG00000099991	calcineurin binding protein 1	0.376392	0.0465234
EPS8L2	ENSG00000177106	EPS8 like 2	0.376243	0.0832883
U2SURP	ENSG00000163714	U2 snRNP associated SURP domain containing	0.375854	0.00180115
ZMAT2	ENSG00000146007	zinc finger matrin-type 2	0.375256	0.00099496
CNOT9	ENSG00000144580	CCR4-NOT transcription complex subunit 9	0.375244	0.0115682
SNHG7	ENSG00000233016	small nucleolar RNA host gene 7	0.375023	0.0378595
SMARCD1	ENSG00000066117	SWI/SNF related, matrix associated, actin dependent regulator of chromatin, subfamily d, member 1	0.374666	0.0231748
FARSB	ENSG00000116120	phenylalanyl-tRNA synthetase subunit beta	0.373772	0.0605053
DYNC2H1	ENSG00000187240	dynein cytoplasmic 2 heavy chain 1	0.372809	0.0386487
CDCP1	ENSG00000163814	CUB domain containing protein 1	0.372201	0.00728426
PPIF	ENSG00000108179	peptidylprolyl isomerase F	0.372177	0.0456225
FAM136A	ENSG00000035141	family with sequence similarity 136 member A	0.372162	0.0254518
BUB1B	ENSG00000156970	BUB1 mitotic checkpoint serine/threonine kinase B	0.371778	0.032051
MPHOSPH6	ENSG00000135698	M-phase phosphoprotein 6	0.37174	0.0523388
CDK12	ENSG00000167258	cyclin dependent kinase 12	0.371727	0.00976449
STYXL1	ENSG00000127952	serine/threonine/tyrosine interacting like 1	0.371266	0.0525108
NOP58	ENSG00000055044	NOP58 ribonucleoprotein	0.370828	0.0430405
MGA	ENSG00000174197	MAX dimerization protein MGA	0.370021	0.0943398
DDX54	ENSG00000123064	DEAD-box helicase 54	0.368991	0.0292118
YBX3	ENSG00000060138	Y-box binding protein 3	0.368692	2.12772e-06
PHACTR2	ENSG00000112419	phosphatase and actin regulator 2	0.368124	0.0131934
KMT5A	ENSG00000183955	lysine methyltransferase 5A	0.367603	0.0919328
CFAP97	ENSG00000164323	cilia and flagella associated protein 97	0.36636	0.0109036
PRKAR2A	ENSG00000114302	protein kinase cAMP-dependent type II regulatory subunit alpha	0.366266	0.0207347
CIP2A	ENSG00000163507	cellular inhibitor of PP2A	0.365807	0.0514364
PDIA3	ENSG00000167004	protein disulfide isomerase family A member 3	0.365601	0.0444364
STAM	ENSG00000136738	signal transducing adaptor molecule	0.365515	0.0697643
DNAJA4	ENSG00000140403	DnaJ heat shock protein family (Hsp40) member A4	0.365282	0.0501968
DIAPH1	ENSG00000131504	diaphanous related formin 1	0.36508	0.00171375
HSPA4	ENSG00000170606	heat shock protein family A (Hsp70) member 4	0.36496	0.000773368
NASP	ENSG00000132780	nuclear autoantigenic sperm protein	0.364945	0.00244457
WDR76	ENSG00000092470	WD repeat domain 76	0.364677	0.0464734
DDX46	ENSG00000145833	DEAD-box helicase 46	0.364244	0.011607
SERBP1	ENSG00000142864	SERPINE1 mRNA binding protein 1	0.363737	0.00693584
MRPL27	ENSG00000108826	mitochondrial ribosomal protein L27	0.363134	0.0218405
STIM2	ENSG00000109689	stromal interaction molecule 2	0.363005	0.00829914
LSG1	ENSG00000041802	large 60S subunit nuclear export GTPase 1	0.362431	0.00797953
DNM1L	ENSG00000087470	dynamin 1 like	0.362253	0.0199929
RTN4	ENSG00000115310	reticulon 4	0.361765	0.000256421
ARAP2	ENSG00000047365	ArfGAP with RhoGAP domain, ankyrin repeat and PH domain 2	0.361582	0.033454
WDFY2	ENSG00000139668	WD repeat and FYVE domain containing 2	0.3609	0.0607743
CD2AP	ENSG00000198087	CD2 associated protein	0.360736	0.00123766
BDP1	ENSG00000145734	B double prime 1, subunit of RNA polymerase III transcription initiation factor IIIB	0.360706	0.007535
PPIL1	ENSG00000137168	peptidylprolyl isomerase like 1	0.360449	0.0444364
UBE2G2	ENSG00000184787	ubiquitin conjugating enzyme E2 G2	0.359987	0.0211923
HSPA4L	ENSG00000164070	heat shock protein family A (Hsp70) member 4 like	0.359484	0.0483895
CEP97	ENSG00000182504	centrosomal protein 97	0.359308	0.0104147
CORO1C	ENSG00000110880	coronin 1C	0.359068	0.0061166
MARCHF7	ENSG00000136536	membrane associated ring-CH-type finger 7	0.357952	0.000644759
ILF3	ENSG00000129351	interleukin enhancer binding factor 3	0.357603	0.0337503
DNAJC25	ENSG00000059769	DnaJ heat shock protein family (Hsp40) member C25	0.357273	0.083301
SNHG5	ENSG00000203875	small nucleolar RNA host gene 5	0.356535	0.0635491
GON4L	ENSG00000116580	gon-4 like	0.356343	0.0885954
GPC1	ENSG00000063660	glypican 1	0.355076	0.021046
GAR1	ENSG00000109534	GAR1 ribonucleoprotein	0.354801	0.0269605
SMARCA4	ENSG00000127616	SWI/SNF related, matrix associated, actin dependent regulator of chromatin, subfamily a, member 4	0.354138	0.083265
AKAP8	ENSG00000105127	A-kinase anchoring protein 8	0.354018	0.0368885
RBM41	ENSG00000089682	RNA binding motif protein 41	0.35358	0.0664615
TIMM44	ENSG00000104980	translocase of inner mitochondrial membrane 44	0.353169	0.0606009
SNX5	ENSG00000089006	sorting nexin 5	0.352866	0.0418846
APH1A	ENSG00000117362	aph-1 homolog A, gamma-secretase subunit	0.352692	0.014771
TCF20	ENSG00000100207	transcription factor 20	0.352554	0.0270527
PCNT	ENSG00000160299	pericentrin	0.351922	0.0802584
SSR2	ENSG00000163479	signal sequence receptor subunit 2	0.351754	0.000586134
DESI1	ENSG00000100418	desumoylating isopeptidase 1	0.349712	0.0446476
SNRPD3	ENSG00000100028	small nuclear ribonucleoprotein D3 polypeptide	0.348526	0.0027154
DDX52	ENSG00000278053	DExD-box helicase 52	0.348511	0.0015351
TOP1MT	ENSG00000184428	DNA topoisomerase I mitochondrial	0.3482	0.0868741
HOXA10	ENSG00000253293	homeobox A10	0.34742	0.0722627
MDC1	ENSG00000137337	mediator of DNA damage checkpoint 1	0.347076	0.0688894
AP3M2	ENSG00000070718	adaptor related protein complex 3 subunit mu 2	0.346306	0.0714026
SLC25A39	ENSG00000013306	solute carrier family 25 member 39	0.346301	0.012135
CALU	ENSG00000128595	calumenin	0.346192	0.00395523
GPR157	ENSG00000180758	G protein-coupled receptor 157	0.346016	0.064592
CDC37	ENSG00000105401	cell division cycle 37, HSP90 cochaperone	0.345927	0.0799775
SYNCRIP	ENSG00000135316	synaptotagmin binding cytoplasmic RNA interacting protein	0.345787	0.0159096
RFC3	ENSG00000133119	replication factor C subunit 3	0.345121	0.0664795
USP12	ENSG00000152484	ubiquitin specific peptidase 12	0.344923	0.0821164
HEATR1	ENSG00000119285	HEAT repeat containing 1	0.344418	0.01489
NAPG	ENSG00000134265	NSF attachment protein gamma	0.344364	0.0455192
CEP295	ENSG00000166004	centrosomal protein 295	0.344076	0.0415645
TMA7	ENSG00000232112	translation machinery associated 7 homolog	0.343672	0.0172572
SLC25A13	ENSG00000004864	solute carrier family 25 member 13	0.343481	0.022065
PGM2	ENSG00000169299	phosphoglucomutase 2	0.343112	0.0769535
AP1S3	ENSG00000152056	adaptor related protein complex 1 subunit sigma 3	0.343099	0.0827212
NUP153	ENSG00000124789	nucleoporin 153	0.342707	0.0909275
SLC35E1	ENSG00000127526	solute carrier family 35 member E1	0.342573	0.0110031
CEBPZ	ENSG00000115816	CCAAT enhancer binding protein zeta	0.342277	0.00862515
EI24	ENSG00000149547	EI24 autophagy associated transmembrane protein	0.341698	0.0191229
EVI5	ENSG00000067208	ecotropic viral integration site 5	0.340834	0.0254302
RRP7A	ENSG00000189306	ribosomal RNA processing 7 homolog A	0.340827	0.0810535
TRMT13	ENSG00000122435	tRNA methyltransferase 13 homolog	0.339927	0.0974508
LTN1	ENSG00000198862	listerin E3 ubiquitin protein ligase 1	0.339251	0.0127659
ARID4B	ENSG00000054267	AT-rich interaction domain 4B	0.339089	0.0091369
SMNDC1	ENSG00000119953	survival motor neuron domain containing 1	0.339021	0.0102287
PSMD3	ENSG00000108344	proteasome 26S subunit, non-ATPase 3	0.338151	0.0108543
ALG5	ENSG00000120697	ALG5 dolichyl-phosphate beta-glucosyltransferase	0.337776	0.0375305
AHI1	ENSG00000135541	Abelson helper integration site 1	0.337757	0.0825146
PRPF6	ENSG00000101161	pre-mRNA processing factor 6	0.337356	0.0350956
PQBP1	ENSG00000102103	polyglutamine binding protein 1	0.336847	0.0667145
KNOP1	ENSG00000103550	lysine rich nucleolar protein 1	0.336192	0.035945
FBL	ENSG00000105202	fibrillarin	0.336182	0.0357585
EMC3	ENSG00000125037	ER membrane protein complex subunit 3	0.335576	0.0866751
MED1	ENSG00000125686	mediator complex subunit 1	0.33491	0.000353357
ERCC3	ENSG00000163161	ERCC excision repair 3, TFIIH core complex helicase subunit	0.334107	0.0838755
SUB1	ENSG00000113387	SUB1 regulator of transcription	0.33355	0.00309109
YEATS4	ENSG00000127337	YEATS domain containing 4	0.33346	0.091351
TRIO	ENSG00000038382	trio Rho guanine nucleotide exchange factor	0.333395	0.0582971
FAM32A	ENSG00000105058	family with sequence similarity 32 member A	0.333367	0.0106578
MESD	ENSG00000117899	mesoderm development LRP chaperone	0.333074	0.0165205
SSU72	ENSG00000160075	SSU72 homolog, RNA polymerase II CTD phosphatase	0.333061	0.0100275
RFK	ENSG00000135002	riboflavin kinase	0.332338	0.0809385
DAXX; SMIM40	ENSG00000204209	death domain associated protein	0.331985	0.0445389
MRPL1	ENSG00000169288	mitochondrial ribosomal protein L1	0.331842	0.0613952
PIK3C2A	ENSG00000011405	phosphatidylinositol-4-phosphate 3-kinase catalytic subunit type 2 alpha	0.33148	0.0818913
EIF3G	ENSG00000130811	eukaryotic translation initiation factor 3 subunit G	0.331471	0.012057
STRBP	ENSG00000165209	spermatid perinuclear RNA binding protein	0.331228	0.0941426
MFF	ENSG00000168958	mitochondrial fission factor	0.331025	0.00474215
PDAP1	ENSG00000106244	PDGFA associated protein 1	0.329788	0.00349261
ADIPOR2	ENSG00000006831	adiponectin receptor 2	0.329645	0.0027622
ZZZ3	ENSG00000036549	zinc finger ZZ-type containing 3	0.329342	0.0590708
TTF1	ENSG00000125482	transcription termination factor 1	0.3292	0.0196858
RUVBL1	ENSG00000175792	RuvB like AAA ATPase 1	0.329009	0.0419998
PTCD3	ENSG00000132300	pentatricopeptide repeat domain 3	0.328553	0.0208705
POLR1F	ENSG00000105849	RNA polymerase I subunit F	0.328196	0.031154
EHBP1	ENSG00000115504	EH domain binding protein 1	0.327775	0.0922789
TTF2	ENSG00000116830	transcription termination factor 2	0.327559	0.0191123
ACIN1	ENSG00000100813	apoptotic chromatin condensation inducer 1	0.327048	0.0230345
RSBN1L	ENSG00000187257	round spermatid basic protein 1 like	0.326628	0.0739796
COX19	ENSG00000240230	cytochrome c oxidase assembly factor COX19	0.326436	0.0323014
MCM3AP	ENSG00000160294	minichromosome maintenance complex component 3 associated protein	0.326388	0.0652034
PGRMC1	ENSG00000101856	progesterone receptor membrane component 1	0.326173	0.0316222
TRMT10C	ENSG00000174173	tRNA methyltransferase 10C, mitochondrial RNase P subunit	0.326024	0.0208084
CKAP5	ENSG00000175216	cytoskeleton associated protein 5	0.325718	0.0578167
BCLAF1	ENSG00000029363	BCL2 associated transcription factor 1	0.3256	0.00796326
GTF2F1	ENSG00000125651	general transcription factor IIF subunit 1	0.325442	0.0230828
CCDC43	ENSG00000180329	coiled-coil domain containing 43	0.324904	0.0826403
ANKRD11	ENSG00000167522	ankyrin repeat domain 11	0.324542	0.0008009
TMEM11	ENSG00000178307	transmembrane protein 11	0.324052	0.0910756
ZFP91	ENSG00000186660	ZFP91 zinc finger protein, atypical E3 ubiquitin ligase	0.323915	0.00417804
NEDD1	ENSG00000139350	NEDD1 gamma-tubulin ring complex targeting factor	0.32344	0.0292717
MRPS27	ENSG00000113048	mitochondrial ribosomal protein S27	0.323413	0.0436642
DDX27	ENSG00000124228	DEAD-box helicase 27	0.323	0.0295021
DDX5	ENSG00000108654	DEAD-box helicase 5	0.321288	0.00503459
TMEM181	ENSG00000146433	transmembrane protein 181	0.321027	0.0387973
MRPL20	ENSG00000242485	mitochondrial ribosomal protein L20	0.320788	0.0217762
CDT1	ENSG00000167513	chromatin licensing and DNA replication factor 1	0.32053	0.0788968
FAM193A	ENSG00000125386	family with sequence similarity 193 member A	0.320426	0.0365798
LRPPRC	ENSG00000138095	leucine rich pentatricopeptide repeat containing	0.319689	0.0363482
ODF2	ENSG00000136811	outer dense fiber of sperm tails 2	0.319107	0.0314033
TERF2IP	ENSG00000166848	TERF2 interacting protein	0.318592	0.00914552
ZBTB11	ENSG00000066422	zinc finger and BTB domain containing 11	0.318299	0.0345569
UBE4A	ENSG00000110344	ubiquitination factor E4A	0.318102	0.0596661
HNRNPAB	ENSG00000197451	heterogeneous nuclear ribonucleoprotein A/B	0.317721	0.0315751
RAB34	ENSG00000109113	RAB34, member RAS oncogene family	0.317339	0.0357349
RTCA	ENSG00000137996	RNA 3'-terminal phosphate cyclase	0.317235	0.0312271
MDN1	ENSG00000112159	midasin AAA ATPase 1	0.317078	0.0848583
ELK3	ENSG00000111145	ETS transcription factor ELK3	0.316346	0.0457861
NUP85	ENSG00000125450	nucleoporin 85	0.31597	0.0239652
MTDH	ENSG00000147649	metadherin	0.314978	0.0489292
PHAX	ENSG00000164902	phosphorylated adaptor for RNA export	0.314317	0.0113537
USP48	ENSG00000090686	ubiquitin specific peptidase 48	0.314272	0.0174656
KRR1	ENSG00000111615	KRR1 small subunit processome component homolog	0.31386	0.0618803
EIF3D	ENSG00000100353	eukaryotic translation initiation factor 3 subunit D	0.313189	0.0779203
KHSRP	ENSG00000088247	KH-type splicing regulatory protein	0.31302	0.0320923
STK4	ENSG00000101109	serine/threonine kinase 4	0.311504	0.0177305
MCL1; ADAMTSL4-AS1	ENSG00000143384	MCL1 apoptosis regulator, BCL2 family member	0.311141	0.0134052
APTX	ENSG00000137074	aprataxin	0.310797	0.0709281
PNN	ENSG00000100941	pinin, desmosome associated protein	0.310577	0.0237958
MTAP	ENSG00000099810	methylthioadenosine phosphorylase	0.310551	0.0535389
OTUD4	ENSG00000164164	OTU deubiquitinase 4	0.310425	0.0819672
LIMS1	ENSG00000169756	LIM zinc finger domain containing 1	0.310299	0.0749569
GAS2L1	ENSG00000185340	growth arrest specific 2 like 1	0.309331	0.0725928
MTIF2	ENSG00000085760	mitochondrial translational initiation factor 2	0.308353	0.068187
ZRANB2	ENSG00000132485	zinc finger RANBP2-type containing 2	0.307757	0.0126157
BICD2	ENSG00000185963	BICD cargo adaptor 2	0.30695	0.0741731
CKAP2	ENSG00000136108	cytoskeleton associated protein 2	0.306929	0.0373436
SMG1	ENSG00000157106	SMG1 nonsense mediated mRNA decay associated PI3K related kinase	0.306703	0.0210282
CDC42SE1	ENSG00000197622	CDC42 small effector 1	0.306447	0.0125194
DNPEP	ENSG00000123992	aspartyl aminopeptidase	0.306134	0.0464734
RPL14	ENSG00000188846	ribosomal protein L14	0.305522	0.0520633
TOX4	ENSG00000092203	TOX high mobility group box family member 4	0.305449	0.0310512
GMPS	ENSG00000163655	guanine monophosphate synthase	0.304044	0.0274695
NAA50	ENSG00000121579	N-alpha-acetyltransferase 50, NatE catalytic subunit	0.303918	0.0892444
ECT2	ENSG00000114346	epithelial cell transforming 2	0.303281	0.0214109
NSA2	ENSG00000164346	NSA2 ribosome biogenesis factor	0.302906	0.00742101
POLR2L	ENSG00000177700	RNA polymerase II, I and III subunit L	0.302752	0.0130553
POLR2H	ENSG00000163882	RNA polymerase II, I and III subunit H	0.30219	0.0352525
CREBBP	ENSG00000005339	CREB binding protein	0.301749	0.0213607
ASXL1	ENSG00000171456	ASXL transcriptional regulator 1	0.301152	0.0493196
GUK1	ENSG00000143774	guanylate kinase 1	0.301119	0.0167952
CBR1	ENSG00000159228	carbonyl reductase 1	0.300934	0.0172533
DLGAP5	ENSG00000126787	DLG associated protein 5	0.300398	0.0819597
XRN2	ENSG00000088930	5'-3' exoribonuclease 2	0.299596	0.00797991
POMP	ENSG00000132963	proteasome maturation protein	0.298793	0.00100283
ADI1	ENSG00000182551	acireductone dioxygenase 1	0.298609	0.00681546
PHTF2	ENSG00000006576	putative homeodomain transcription factor 2	0.29842	0.050819
PHRF1	ENSG00000070047	PHD and ring finger domains 1	0.297269	0.0403048
TUBB	ENSG00000196230	tubulin beta class I	0.296476	0.0988099
CD47	ENSG00000196776	CD47 molecule	0.296384	0.0815763
TMCO1	ENSG00000143183	transmembrane and coiled-coil domains 1	0.296036	0.00384029
ZNF451	ENSG00000112200	zinc finger protein 451	0.295781	0.032303
TAX1BP1	ENSG00000106052	Tax1 binding protein 1	0.295753	0.00171454
MRPL14	ENSG00000180992	mitochondrial ribosomal protein L14	0.295027	0.0140469
SNX10	ENSG00000086300	sorting nexin 10	0.295003	0.0963266
RPL36	ENSG00000130255	ribosomal protein L36	0.294605	0.0120094
H3-3B	ENSG00000132475	H3.3 histone B	0.294081	0.0173055
SET	ENSG00000119335	SET nuclear proto-oncogene	0.293842	0.0374901
RPL27A	ENSG00000166441	ribosomal protein L27a	0.293827	0.0230474
CARM1	ENSG00000142453	coactivator associated arginine methyltransferase 1	0.293823	0.0358925
TSKU	ENSG00000182704	tsukushi, small leucine rich proteoglycan	0.293352	0.0988099
HMGXB4	ENSG00000100281	HMG-box containing 4	0.292351	0.0785111
RBM10	ENSG00000182872	RNA binding motif protein 10	0.292322	0.0877998
RPL35	ENSG00000136942	ribosomal protein L35	0.29196	0.00447847
GNA15	ENSG00000060558	G protein subunit alpha 15	0.291874	0.0985918
CBX1	ENSG00000108468	chromobox 1	0.291614	0.0280237
DNAJA1	ENSG00000086061	DnaJ heat shock protein family (Hsp40) member A1	0.291605	0.0268603
PRPF40A	ENSG00000196504	pre-mRNA processing factor 40 homolog A	0.291494	0.000747519
LUC7L3	ENSG00000108848	LUC7 like 3 pre-mRNA splicing factor	0.291452	0.0097878
GDI2	ENSG00000057608	GDP dissociation inhibitor 2	0.291276	0.0135932
NIBAN2	ENSG00000136830	niban apoptosis regulator 2	0.291131	0.0709579
PARP1	ENSG00000143799	poly(ADP-ribose) polymerase 1	0.290631	0.00549769
CLIP1	ENSG00000130779	CAP-Gly domain containing linker protein 1	0.290577	0.000341244
ATG12	ENSG00000145782	autophagy related 12	0.289869	0.0506515
EIF2S2	ENSG00000125977	eukaryotic translation initiation factor 2 subunit beta	0.288563	0.0165938
FXR1	ENSG00000114416	FMR1 autosomal homolog 1	0.288547	0.0148576
GTF2F2	ENSG00000188342	general transcription factor IIF subunit 2	0.288357	0.0664992
POLQ	ENSG00000051341	DNA polymerase theta	0.287938	0.0786386
NF1	ENSG00000196712	neurofibromin 1	0.287542	0.00380516
AKT2	ENSG00000105221	AKT serine/threonine kinase 2	0.28638	0.0855243
PIM3	ENSG00000198355	Pim-3 proto-oncogene, serine/threonine kinase	0.286119	0.0677283
ZCCHC10	ENSG00000155329	zinc finger CCHC-type containing 10	0.286082	0.0245836
CDK1	ENSG00000170312	cyclin dependent kinase 1	0.285857	0.0636061
UCHL3	ENSG00000118939	ubiquitin C-terminal hydrolase L3	0.284812	0.0988099
HNRNPDL	ENSG00000152795	heterogeneous nuclear ribonucleoprotein D like	0.284745	0.00697393
YBX1	ENSG00000065978	Y-box binding protein 1	0.28429	0.027857
TENT4B	ENSG00000121274	terminal nucleotidyltransferase 4B	0.283958	0.0388444
LOC105372824; PDXK	ENSG00000160209	pyridoxal kinase	0.283894	0.0165228
URI1	ENSG00000105176	URI1 prefoldin like chaperone	0.283668	0.0207678
RAB35	ENSG00000111737	RAB35, member RAS oncogene family	0.282627	0.0876564
GPD2	ENSG00000115159	glycerol-3-phosphate dehydrogenase 2	0.281694	0.0168782
GNL2	ENSG00000134697	G protein nucleolar 2	0.281569	0.0911945
NSRP1	ENSG00000126653	nuclear speckle splicing regulatory protein 1	0.281197	0.0379014
SYNGR2	ENSG00000108639	synaptogyrin 2	0.28109	0.0835805
ILF2	ENSG00000143621	interleukin enhancer binding factor 2	0.280408	0.0248821
UBA52	ENSG00000221983	ubiquitin A-52 residue ribosomal protein fusion product 1	0.279367	0.00383291
MRPS6	ENSG00000243927	mitochondrial ribosomal protein S6	0.279003	0.0402799
HSPA9	ENSG00000113013	heat shock protein family A (Hsp70) member 9	0.278986	0.073429
ATP2B1	ENSG00000070961	ATPase plasma membrane Ca2+ transporting 1	0.278178	0.0463574
TXLNA	ENSG00000084652	taxilin alpha	0.27794	0.0641932
CAP1	ENSG00000131236	cyclase associated actin cytoskeleton regulatory protein 1	0.277353	0.000456386
SNRPB2	ENSG00000125870	small nuclear ribonucleoprotein polypeptide B2	0.277241	0.045034
MPHOSPH10	ENSG00000124383	M-phase phosphoprotein 10	0.276749	0.059691
SRSF6	ENSG00000124193	serine and arginine rich splicing factor 6	0.276544	0.0789385
G3BP1	ENSG00000145907	G3BP stress granule assembly factor 1	0.275845	0.00284753
RUVBL2	ENSG00000183207	RuvB like AAA ATPase 2	0.275181	0.0621307
SYAP1	ENSG00000169895	synapse associated protein 1	0.274756	0.0166321
VMA21	ENSG00000160131	vacuolar ATPase assembly factor VMA21	0.274668	0.0938839
FBXO45	ENSG00000174013	F-box protein 45	0.274593	0.0208355
KNL1	ENSG00000137812	kinetochore scaffold 1	0.274468	0.0592204
GART	ENSG00000159131	phosphoribosylglycinamide formyltransferase, phosphoribosylglycinamide synthetase, phosphoribosylaminoimidazole synthetase	0.274327	0.0333989
AAGAB	ENSG00000103591	alpha and gamma adaptin binding protein	0.274322	0.0408872
OCIAD2	ENSG00000145247	OCIA domain containing 2	0.27425	0.081707
LARP7	ENSG00000174720	La ribonucleoprotein 7, transcriptional regulator	0.273697	0.0229513
KIF2A	ENSG00000068796	kinesin family member 2A	0.273671	0.0152693
SRRM2	ENSG00000167978	serine/arginine repetitive matrix 2	0.273567	0.0530718
CNOT7	ENSG00000198791	CCR4-NOT transcription complex subunit 7	0.273187	0.0713161
THOC2	ENSG00000125676	THO complex 2	0.27316	0.000440334
SNW1	ENSG00000100603	SNW domain containing 1	0.272494	0.0225999
RPL12	ENSG00000197958	ribosomal protein L12	0.271623	0.00123115
TAF1D	ENSG00000166012	TATA-box binding protein associated factor, RNA polymerase I subunit D	0.271523	0.053549
TRIP6	ENSG00000087077	thyroid hormone receptor interactor 6	0.27106	0.0902734
TARS1	ENSG00000113407	threonyl-tRNA synthetase 1	0.270549	0.00790707
IFT57	ENSG00000114446	intraflagellar transport 57	0.269966	0.0612626
CTR9	ENSG00000198730	CTR9 homolog, Paf1/RNA polymerase II complex component	0.269713	0.0613952
UFM1	ENSG00000120686	ubiquitin fold modifier 1	0.268778	0.0951493
IWS1	ENSG00000163166	interacts with SUPT6H, CTD assembly factor 1	0.266536	0.0710769
ATP13A3	ENSG00000133657	ATPase 13A3	0.266055	0.0246423
SNHG29	ENSG00000175061	small nucleolar RNA host gene 29	0.265824	0.0124508
PPIL4	ENSG00000131013	peptidylprolyl isomerase like 4	0.264115	0.0709352
HNRNPA1	ENSG00000135486	heterogeneous nuclear ribonucleoprotein A1	0.264075	0.0231884
NDUFS6	ENSG00000145494	NADH:ubiquinone oxidoreductase subunit S6	0.261103	0.0211233
S100A14	ENSG00000189334	S100 calcium binding protein A14	0.260777	0.0567585
UBE2K	ENSG00000078140	ubiquitin conjugating enzyme E2 K	0.260773	0.00143671
PDIA6	ENSG00000143870	protein disulfide isomerase family A member 6	0.259736	0.00397853
IRF2BP2	ENSG00000168264	interferon regulatory factor 2 binding protein 2	0.25925	0.0459645
THUMPD1	ENSG00000066654	THUMP domain containing 1	0.259125	0.0280237
SNX27	ENSG00000143376	sorting nexin 27	0.258318	0.0647536
SRSF7	ENSG00000115875	serine and arginine rich splicing factor 7	0.258307	0.0151337
RANBP2	ENSG00000153201	RAN binding protein 2	0.257768	0.0339542
RPS15	ENSG00000115268	ribosomal protein S15	0.257306	0.0831026
PSMD14	ENSG00000115233	proteasome 26S subunit, non-ATPase 14	0.256154	0.0673119
EMD	ENSG00000102119	emerin	0.25559	0.0779203
SF3A3	ENSG00000183431	splicing factor 3a subunit 3	0.255127	0.0635491
DSTN	ENSG00000125868	destrin, actin depolymerizing factor	0.255109	0.00428872
STOML2	ENSG00000165283	stomatin like 2	0.255019	0.0575543
SSR1	ENSG00000124783	signal sequence receptor subunit 1	0.254424	0.0435071
TRAPPC3	ENSG00000054116	trafficking protein particle complex 3	0.253597	0.0589175
FAM177A1	ENSG00000151327	family with sequence similarity 177 member A1	0.252879	0.0851864
DDX1	ENSG00000079785	DEAD-box helicase 1	0.252374	0.0677148
PRRC2C	ENSG00000117523	proline rich coiled-coil 2C	0.252326	0.0290919
PFDN4	ENSG00000101132	prefoldin subunit 4	0.251559	0.0177305
CDC73	ENSG00000134371	cell division cycle 73	0.251493	0.0724368
SDCCAG8	ENSG00000054282	SHH signaling and ciliogenesis regulator SDCCAG8	0.25026	0.0880939
YWHAG	ENSG00000170027	tyrosine 3-monooxygenase/tryptophan 5-monooxygenase activation protein gamma	0.249983	0.0108449
RAD23B	ENSG00000119318	RAD23 homolog B, nucleotide excision repair protein	0.249905	0.0516974
PPP4R1	ENSG00000154845	protein phosphatase 4 regulatory subunit 1	0.247778	0.0415045
NMT1	ENSG00000136448	N-myristoyltransferase 1	0.247657	0.0454091
MKNK2	ENSG00000099875	MAPK interacting serine/threonine kinase 2	0.247126	0.0540704
ZNF770	ENSG00000198146	zinc finger protein 770	0.245826	0.0962271
CCDC47	ENSG00000108588	coiled-coil domain containing 47	0.245611	0.0518326
ATXN7L3B	ENSG00000253719	ataxin 7 like 3B	0.245171	0.0793588
PSMC5	ENSG00000087191	proteasome 26S subunit, ATPase 5	0.244175	0.0736562
SFPQ	ENSG00000116560	splicing factor proline and glutamine rich	0.243907	0.0478931
TMEM9B	ENSG00000175348	TMEM9 domain family member B	0.243611	0.0212806
NDUFA9	ENSG00000139180	NADH:ubiquinone oxidoreductase subunit A9	0.243021	0.07067
CSNK2A1	ENSG00000101266	casein kinase 2 alpha 1	0.242857	0.0160766
NCBP2	ENSG00000114503	nuclear cap binding protein subunit 2	0.24155	0.0616071
KPNB1	ENSG00000108424	karyopherin subunit beta 1	0.241277	0.0775479
GALNT1	ENSG00000141429	polypeptide N-acetylgalactosaminyltransferase 1	0.240976	0.0785111
NUP214	ENSG00000126883	nucleoporin 214	0.24085	0.0888936
THRAP3	ENSG00000054118	thyroid hormone receptor associated protein 3	0.238396	0.0732873
HNRNPC	ENSG00000092199	heterogeneous nuclear ribonucleoprotein C	0.236331	0.0631893
RPS3A	ENSG00000145425	ribosomal protein S3A	0.233615	0.0898029
VPS13A	ENSG00000197969	vacuolar protein sorting 13 homolog A	0.232971	0.0837791
CFL1	ENSG00000172757	cofilin 1	0.232395	0.0243156
ST13	ENSG00000100380	ST13 Hsp70 interacting protein	0.232334	0.0571486
TCERG1	ENSG00000113649	transcription elongation regulator 1	0.231974	0.0877953
MCM7	ENSG00000166508	minichromosome maintenance complex component 7	0.231668	0.0470777
LBR	ENSG00000143815	lamin B receptor	0.231086	0.0789987
CELF1	ENSG00000149187	CUGBP Elav-like family member 1	0.230473	0.0254331
SMARCA5	ENSG00000153147	SWI/SNF related, matrix associated, actin dependent regulator of chromatin, subfamily a, member 5	0.230057	0.0103105
HUWE1	ENSG00000086758	HECT, UBA and WWE domain containing E3 ubiquitin protein ligase 1	0.229659	0.0658566
SLTM	ENSG00000137776	SAFB like transcription modulator	0.227832	0.0743359
SERP1	ENSG00000120742	stress associated endoplasmic reticulum protein 1	0.22673	0.0951578
CLTA	ENSG00000122705	clathrin light chain A	0.225365	0.0397196
LAMTOR1	ENSG00000149357	late endosomal/lysosomal adaptor, MAPK and MTOR activator 1	0.22461	0.0237221
SF3B2	ENSG00000087365	splicing factor 3b subunit 2	0.223633	0.0567841
CST3	ENSG00000101439	cystatin C	0.221298	0.0573469
NAP1L4	ENSG00000205531	nucleosome assembly protein 1 like 4	0.221034	0.0234032
PFDN5	ENSG00000123349	prefoldin subunit 5	0.220915	0.0706913
IGF2R	ENSG00000197081	insulin like growth factor 2 receptor	0.218937	0.0796739
FAF2	ENSG00000113194	Fas associated factor family member 2	0.218929	0.0822416
WAPL	ENSG00000062650	WAPL cohesin release factor	0.217995	0.0734107
ROCK1	ENSG00000067900	Rho associated coiled-coil containing protein kinase 1	0.217561	0.0571486
SEC11A	ENSG00000140612	SEC11 homolog A, signal peptidase complex subunit	0.217412	0.0716639
BRD2	ENSG00000204256	bromodomain containing 2	0.217048	0.0428853
DHX36	ENSG00000174953	DEAH-box helicase 36	0.216062	0.0607076
ATP5IF1	ENSG00000130770	ATP synthase inhibitory factor subunit 1	0.215608	0.0681567
MRPS34	ENSG00000074071	mitochondrial ribosomal protein S34	0.215329	0.0619012
IBTK	ENSG00000005700	inhibitor of Bruton tyrosine kinase	0.215061	0.0688369
RPS25	ENSG00000118181	ribosomal protein S25	0.214814	0.0107419
TRIP12	ENSG00000153827	thyroid hormone receptor interactor 12	0.213074	0.0831218
AFF4	ENSG00000072364	AF4/FMR2 family member 4	0.212257	0.0655427
NFIC	ENSG00000141905	nuclear factor I C	0.212008	0.0742143
WDR45B	ENSG00000141580	WD repeat domain 45B	0.210977	0.0664615
MBD4	ENSG00000129071	methyl-CpG binding domain 4, DNA glycosylase	0.209641	0.0581425
CCAR1	ENSG00000060339	cell division cycle and apoptosis regulator 1	0.207064	0.081707
ZNF24	ENSG00000172466	zinc finger protein 24	0.199613	0.0702273
CKAP4	ENSG00000136026	cytoskeleton associated protein 4	0.197067	0.0938641
GMNN	ENSG00000112312	geminin DNA replication inhibitor	0.194801	0.0972004
ARPC2	ENSG00000163466	actin related protein 2/3 complex subunit 2	0.189324	0.00386516
NUFIP2	ENSG00000108256	nuclear FMR1 interacting protein 2	0.187189	0.0506515
SEPTIN7	ENSG00000122545	septin 7	0.177922	0.0964315
DDX3X	ENSG00000215301	DEAD-box helicase 3 X-linked	0.170603	0.0769535
PCBP2	ENSG00000197111	poly(rC) binding protein 2	0.168965	0.083301
RPS11	ENSG00000142534	ribosomal protein S11	0.163701	0.0371822
COX8A	ENSG00000176340	cytochrome c oxidase subunit 8A	-0.156005	0.0368705
DYNLRB1	ENSG00000125971	dynein light chain roadblock-type 1	-0.156177	0.0940301
TIPRL	ENSG00000143155	TOR signaling pathway regulator	-0.188768	0.0898029
SCAF11	ENSG00000139218	SR-related CTD associated factor 11	-0.198255	0.0616848
WIPF2	ENSG00000171475	WAS/WASL interacting protein family member 2	-0.198564	0.0681334
UQCR10	ENSG00000184076	ubiquinol-cytochrome c reductase, complex III subunit X	-0.205262	0.0946767
LCOR	ENSG00000196233	ligand dependent nuclear receptor corepressor	-0.205565	0.0721948
UQCRH	ENSG00000173660	ubiquinol-cytochrome c reductase hinge protein	-0.21101	0.0121231
RBBP7	ENSG00000102054	RB binding protein 7, chromatin remodeling factor	-0.214534	0.0983536
F11R	ENSG00000158769	F11 receptor	-0.215596	0.0905628
PAFAH1B1	ENSG00000007168	platelet activating factor acetylhydrolase 1b regulatory subunit 1	-0.216583	0.0784364
CUL5	ENSG00000166266	cullin 5	-0.217271	0.0902085
TMOD3; LOC112268148	ENSG00000138594	tropomodulin 3	-0.221246	0.0558229
MZT2B	ENSG00000152082	mitotic spindle organizing protein 2B	-0.223918	0.0680755
COX5A	ENSG00000178741	cytochrome c oxidase subunit 5A	-0.224153	0.0154939
COX7A2	ENSG00000112695	cytochrome c oxidase subunit 7A2	-0.224301	0.0424556
ATP6	ENSG00000198899	mitochondrially encoded ATP synthase membrane subunit 6	-0.227343	0.0418779
MED15	ENSG00000099917	mediator complex subunit 15	-0.228117	0.0841705
BAG6	ENSG00000204463	BAG cochaperone 6	-0.231338	0.0751836
ABHD2	ENSG00000140526	abhydrolase domain containing 2, acylglycerol lipase	-0.231542	0.0533828
RIN2	ENSG00000132669	Ras and Rab interactor 2	-0.232908	0.0501851
ASXL2	ENSG00000143970	ASXL transcriptional regulator 2	-0.234282	0.0635449
PRRC2B	ENSG00000130723		-0.235971	0.063458
NR3C1	ENSG00000113580	nuclear receptor subfamily 3 group C member 1	-0.237646	0.0118196
RAC1	ENSG00000136238	Rac family small GTPase 1	-0.237885	0.0803142
SEPTIN8	ENSG00000164402	septin 8	-0.241231	0.0956152
RNF11	ENSG00000123091	ring finger protein 11	-0.242555	0.0827489
TMTC3	ENSG00000139324	transmembrane O-mannosyltransferase targeting cadherins 3	-0.242632	0.0454642
MRPS31	ENSG00000102738	mitochondrial ribosomal protein S31	-0.242851	0.097599
VAMP3	ENSG00000049245	vesicle associated membrane protein 3	-0.244349	0.066248
MEAK7	ENSG00000140950	MTOR associated protein, eak-7 homolog	-0.244887	0.087881
PDZD8	ENSG00000165650	PDZ domain containing 8	-0.24687	0.078874
STX16	ENSG00000124222	syntaxin 16	-0.248251	0.0206915
NDFIP1	ENSG00000131507	Nedd4 family interacting protein 1	-0.249918	0.059691
FAM162A	ENSG00000114023	family with sequence similarity 162 member A	-0.252413	0.0193753
SNX12	ENSG00000147164	sorting nexin 12	-0.252749	0.0535423
ZFP36L1	ENSG00000185650	ZFP36 ring finger protein like 1	-0.253056	0.020496
ABHD12	ENSG00000100997	abhydrolase domain containing 12, lysophospholipase	-0.257955	0.0810298
COX4I1	ENSG00000131143	cytochrome c oxidase subunit 4I1	-0.258524	0.00908894
TPD52	ENSG00000076554	tumor protein D52	-0.260133	0.097599
HP1BP3	ENSG00000127483	heterochromatin protein 1 binding protein 3	-0.260205	0.0567562
NDUFB11	ENSG00000147123	NADH:ubiquinone oxidoreductase subunit B11	-0.263205	0.0723023
UBR2	ENSG00000024048	ubiquitin protein ligase E3 component n-recognin 2	-0.264373	0.0113654
SAMD4B	ENSG00000179134	sterile alpha motif domain containing 4B	-0.265222	0.0977503
GHITM	ENSG00000165678	growth hormone inducible transmembrane protein	-0.265748	0.0321069
WWTR1	ENSG00000018408	WW domain containing transcription regulator 1	-0.266922	0.0838755
CXXC5	ENSG00000171604	CXXC finger protein 5	-0.267104	0.0736141
ARID1B	ENSG00000049618	AT-rich interaction domain 1B	-0.267728	0.018703
COX6C	ENSG00000164919	cytochrome c oxidase subunit 6C	-0.272359	0.0403048
ITSN1	ENSG00000205726	intersectin 1	-0.272464	0.0746368
CCDC186	ENSG00000165813	coiled-coil domain containing 186	-0.273169	0.0733456
TSG101	ENSG00000074319	tumor susceptibility 101	-0.274606	0.0952552
ATP5F1B	ENSG00000110955	ATP synthase F1 subunit beta	-0.274861	0.00218713
SERINC1	ENSG00000111897	serine incorporator 1	-0.277613	0.0972295
ELL2	ENSG00000118985	elongation factor for RNA polymerase II 2	-0.280179	0.0712824
CTNNBIP1	ENSG00000178585	catenin beta interacting protein 1	-0.280815	0.0338077
TAX1BP3	ENSG00000213977	Tax1 binding protein 3	-0.283516	0.0126682
NDUFB4	ENSG00000065518	NADH:ubiquinone oxidoreductase subunit B4	-0.285927	0.0421955
ZDHHC3	ENSG00000163812	zinc finger DHHC-type palmitoyltransferase 3	-0.287677	0.0290919
VDAC3	ENSG00000078668	voltage dependent anion channel 3	-0.28908	0.0915678
ATP2C1	ENSG00000017260	ATPase secretory pathway Ca2+ transporting 1	-0.289402	0.0481221
ATP6V1E1	ENSG00000131100	ATPase H+ transporting V1 subunit E1	-0.289458	0.0140244
TPD52L1	ENSG00000111907	TPD52 like 1	-0.290541	0.0573967
PCYOX1	ENSG00000116005	prenylcysteine oxidase 1	-0.290995	0.0373864
WDR90	ENSG00000161996	WD repeat domain 90	-0.292897	0.0571157
LGALS3	ENSG00000131981	galectin 3	-0.294754	0.0340279
ALCAM	ENSG00000170017	activated leukocyte cell adhesion molecule	-0.294937	0.0212961
UQCRC2	ENSG00000140740	ubiquinol-cytochrome c reductase core protein 2	-0.29548	0.00724802
FKBP3	ENSG00000100442	FKBP prolyl isomerase 3	-0.296225	0.000291234
ATP5F1A	ENSG00000152234	ATP synthase F1 subunit alpha	-0.297488	0.0129298
HINT1	ENSG00000169567	histidine triad nucleotide binding protein 1	-0.299519	0.0943901
ZFAND5	ENSG00000107372	zinc finger AN1-type containing 5	-0.30064	0.0185715
ILRUN	ENSG00000196821	inflammation and lipid regulator with UBA-like and NBR1-like domains	-0.300917	0.00355111
HDAC1	ENSG00000116478	histone deacetylase 1	-0.301776	0.0225999
CEP350	ENSG00000135837	centrosomal protein 350	-0.302433	0.0393772
PCYT1A	ENSG00000161217	phosphate cytidylyltransferase 1, choline, alpha	-0.305292	0.0100634
BACE2	ENSG00000182240	beta-secretase 2	-0.30617	0.086753
KLF3	ENSG00000109787	Kruppel like factor 3	-0.306307	0.0142771
COG4	ENSG00000103051	component of oligomeric golgi complex 4	-0.307803	0.0972911
C1GALT1	ENSG00000106392	core 1 synthase, glycoprotein-N-acetylgalactosamine 3-beta-galactosyltransferase 1	-0.309089	0.0340392
CAV2	ENSG00000105971	caveolin 2	-0.310129	0.0970633
LINC01578	ENSG00000272888	CHD2 adjacent suppressive regulatory RNA	-0.311274	0.0616255
TCF7L2	ENSG00000148737	transcription factor 7 like 2	-0.311631	0.0500614
DOLPP1	ENSG00000167130	dolichyldiphosphatase 1	-0.3127	0.0667628
SEPTIN9	ENSG00000184640	septin 9	-0.313766	0.0119536
GGA2	ENSG00000103365	golgi associated, gamma adaptin ear containing, ARF binding protein 2	-0.313801	0.0218155
ADAM10	ENSG00000137845	ADAM metallopeptidase domain 10	-0.314461	0.0336755
PITPNA	ENSG00000174238	phosphatidylinositol transfer protein alpha	-0.315836	0.0329924
ANKRD12	ENSG00000101745	ankyrin repeat domain 12	-0.317219	0.0106047
BMP7	ENSG00000101144	bone morphogenetic protein 7	-0.317964	0.0910756
SNX2	ENSG00000205302	sorting nexin 2	-0.318481	0.0835805
HADHB	ENSG00000138029	hydroxyacyl-CoA dehydrogenase trifunctional multienzyme complex subunit beta	-0.318498	0.0759209
ASF1A	ENSG00000111875	anti-silencing function 1A histone chaperone	-0.318856	0.0881973
COX5B	ENSG00000135940	cytochrome c oxidase subunit 5B	-0.319003	0.0424556
AHNAK	ENSG00000124942	AHNAK nucleoprotein	-0.319169	0.0161528
FNDC3B	ENSG00000075420	fibronectin type III domain containing 3B	-0.319188	0.0497549
SNAPIN	ENSG00000143553	SNAP associated protein	-0.319189	0.0919741
MYOF	ENSG00000138119	myoferlin	-0.319743	0.000297767
NFS1	ENSG00000244005	NFS1 cysteine desulfurase	-0.320167	0.0826481
DLG5	ENSG00000151208	discs large MAGUK scaffold protein 5	-0.320945	0.0680279
REL	ENSG00000162924	REL proto-oncogene, NF-kB subunit	-0.321687	0.0837216
VRK2	ENSG00000028116	VRK serine/threonine kinase 2	-0.322721	0.0896789
MET	ENSG00000105976	MET proto-oncogene, receptor tyrosine kinase	-0.325136	0.0482519
PFKL	ENSG00000141959	phosphofructokinase, liver type	-0.326212	0.0817419
AIP	ENSG00000110711	aryl hydrocarbon receptor interacting protein	-0.326311	0.0576725
FAM107B	ENSG00000065809	family with sequence similarity 107 member B	-0.326521	0.0629762
SLC38A10	ENSG00000157637	solute carrier family 38 member 10	-0.327275	0.0833037
MICALL1	ENSG00000100139	MICAL like 1	-0.328288	0.0913904
SLK	ENSG00000065613	STE20 like kinase	-0.329069	0.00103223
ARHGAP1	ENSG00000175220	Rho GTPase activating protein 1	-0.330951	0.0107647
MIA2	ENSG00000150527	MIA SH3 domain ER export factor 2	-0.331891	0.0962096
USP25	ENSG00000155313	ubiquitin specific peptidase 25	-0.332033	0.0789962
HAGH	ENSG00000063854	hydroxyacylglutathione hydrolase	-0.332706	0.098062
NDUFA12	ENSG00000184752	NADH:ubiquinone oxidoreductase subunit A12	-0.332757	0.0314033
FBXO9	ENSG00000112146	F-box protein 9	-0.332787	0.0122087
CIRBP	ENSG00000099622	cold inducible RNA binding protein	-0.333161	0.0312271
GGCT	ENSG00000006625	gamma-glutamylcyclotransferase	-0.333514	0.0461431
LCMT1	ENSG00000205629	leucine carboxyl methyltransferase 1	-0.335113	0.0655612
PDLIM5	ENSG00000163110	PDZ and LIM domain 5	-0.335136	0.0382402
ARHGAP32	ENSG00000134909	Rho GTPase activating protein 32	-0.337297	0.0954217
APP	ENSG00000142192	amyloid beta precursor protein	-0.337803	0.00152667
SFT2D2	ENSG00000213064	SFT2 domain containing 2	-0.339022	0.012687
OSBPL3	ENSG00000070882	oxysterol binding protein like 3	-0.339816	0.0475404
SLC38A2	ENSG00000134294	solute carrier family 38 member 2	-0.339916	0.00377721
FEM1B	ENSG00000169018	fem-1 homolog B	-0.340325	0.0293872
MAL2	ENSG00000147676	mal, T cell differentiation protein 2	-0.343187	0.0443941
ECI1	ENSG00000167969	enoyl-CoA delta isomerase 1	-0.344206	0.0140167
KLHL12	ENSG00000117153	kelch like family member 12	-0.344285	0.0880939
CD58	ENSG00000116815	CD58 molecule	-0.344683	0.0737518
KIAA1191	ENSG00000122203	KIAA1191	-0.345547	0.0541313
EXOC7	ENSG00000182473	exocyst complex component 7	-0.345931	0.0228502
ATP5PB	ENSG00000116459	ATP synthase peripheral stalk-membrane subunit b	-0.346353	0.00954159
CAMTA1	ENSG00000171735	calmodulin binding transcription activator 1	-0.347122	0.0191234
CSNK1D	ENSG00000141551	casein kinase 1 delta	-0.347503	0.0557817
COX6A1	ENSG00000111775	cytochrome c oxidase subunit 6A1	-0.352561	0.00675854
PAK1	ENSG00000149269	p21 (RAC1) activated kinase 1	-0.353043	0.0371822
ATP11B	ENSG00000058063	ATPase phospholipid transporting 11B (putative)	-0.353491	0.02647
TRAF7	ENSG00000131653	TNF receptor associated factor 7	-0.354046	0.0915374
KIAA0586	ENSG00000100578	KIAA0586	-0.354612	0.0815268
COMMD2	ENSG00000114744	COMM domain containing 2	-0.354741	0.0505302
MKNK1	ENSG00000079277	MAPK interacting serine/threonine kinase 1	-0.355246	0.0336565
TMEM30A	ENSG00000112697	transmembrane protein 30A	-0.356081	0.0220119
CUL4B	ENSG00000158290	cullin 4B	-0.356371	0.0171524
GOT1	ENSG00000120053	glutamic-oxaloacetic transaminase 1	-0.357191	0.0131077
TBC1D15	ENSG00000121749	TBC1 domain family member 15	-0.357363	0.0120094
ATP5MC3	ENSG00000154518	ATP synthase membrane subunit c locus 3	-0.359175	0.000815295
RAB4A	ENSG00000168118	RAB4A, member RAS oncogene family	-0.359541	0.0796627
ICMT	ENSG00000116237	isoprenylcysteine carboxyl methyltransferase	-0.360204	0.0280046
PDP1	ENSG00000164951	pyruvate dehyrogenase phosphatase catalytic subunit 1	-0.363107	0.0683316
ACO2	ENSG00000100412	aconitase 2	-0.363673	0.00150463
MPHOSPH8	ENSG00000196199	M-phase phosphoprotein 8	-0.364052	0.00957694
MGST2	ENSG00000085871	microsomal glutathione S-transferase 2	-0.364092	0.0978974
MPV17	ENSG00000115204	mitochondrial inner membrane protein MPV17	-0.36603	0.0970711
IGF1R	ENSG00000140443	insulin like growth factor 1 receptor	-0.366386	0.0938193
SRGAP1	ENSG00000196935	SLIT-ROBO Rho GTPase activating protein 1	-0.366838	0.00179547
NCOA2	ENSG00000140396	nuclear receptor coactivator 2	-0.367778	0.0428853
NPLOC4	ENSG00000182446	NPL4 homolog, ubiquitin recognition factor	-0.367798	0.0124508
UBXN6	ENSG00000167671	UBX domain protein 6	-0.36785	0.0444612
ND3	ENSG00000198840	mitochondrially encoded NADH:ubiquinone oxidoreductase core subunit 3	-0.370116	0.0374307
UBE3B	ENSG00000151148	ubiquitin protein ligase E3B	-0.370708	0.00775253
ANAPC11	ENSG00000141552	anaphase promoting complex subunit 11	-0.370873	0.010947
IFI16	ENSG00000163565	interferon gamma inducible protein 16	-0.370955	0.0326622
BPNT2	ENSG00000104331	3'(2'), 5'-bisphosphate nucleotidase 2	-0.371274	0.0159743
TM4SF1	ENSG00000169908	transmembrane 4 L six family member 1	-0.3714	0.0127905
RPS6KA3	ENSG00000177189	ribosomal protein S6 kinase A3	-0.371738	0.0164808
HIF1A	ENSG00000100644	hypoxia inducible factor 1 subunit alpha	-0.372105	0.0192032
RDX	ENSG00000137710	radixin	-0.37284	0.000200019
SESTD1	ENSG00000187231	SEC14 and spectrin domain containing 1	-0.373286	0.0117195
PAFAH1B3	ENSG00000079462	platelet activating factor acetylhydrolase 1b catalytic subunit 3	-0.373576	0.0395232
MRI1	ENSG00000037757	methylthioribose-1-phosphate isomerase 1	-0.373727	0.0998876
ZCCHC14	ENSG00000140948	zinc finger CCHC-type containing 14	-0.375194	0.0716934
PRKAA1	ENSG00000132356	protein kinase AMP-activated catalytic subunit alpha 1	-0.375321	0.0836534
SLC1A5	ENSG00000105281	solute carrier family 1 member 5	-0.375652	0.0558381
ATRAID	ENSG00000138085	all-trans retinoic acid induced differentiation factor	-0.37622	0.00339283
VANGL1	ENSG00000173218	VANGL planar cell polarity protein 1	-0.376442	0.00186916
HDGFL3	ENSG00000166503	HDGF like 3	-0.376715	0.0448655
CREB3L2	ENSG00000182158	cAMP responsive element binding protein 3 like 2	-0.376776	0.0741731
ITPR2	ENSG00000123104	inositol 1,4,5-trisphosphate receptor type 2	-0.377315	0.0358799
FAM111B	ENSG00000189057	FAM111 trypsin like peptidase B	-0.377369	0.0210268
LRSAM1	ENSG00000148356	leucine rich repeat and sterile alpha motif containing 1	-0.377922	0.0988099
ATXN3	ENSG00000066427	ataxin 3	-0.378483	0.0998198
DPY19L4	ENSG00000156162	dpy-19 like 4	-0.378531	0.0240093
CLOCK	ENSG00000134852	clock circadian regulator	-0.378973	0.0239652
NBR1	ENSG00000188554	NBR1 autophagy cargo receptor	-0.379033	0.0393777
HSPB11	ENSG00000081870	heat shock protein family B (small) member 11	-0.37912	0.0732773
TULP3	ENSG00000078246	TUB like protein 3	-0.37976	0.0248115
CMAS	ENSG00000111726	cytidine monophosphate N-acetylneuraminic acid synthetase	-0.379772	0.00433287
PIK3CB	ENSG00000051382	phosphatidylinositol-4,5-bisphosphate 3-kinase catalytic subunit beta	-0.380135	0.0487467
CPNE1	ENSG00000214078	copine 1	-0.380506	0.0943901
STMN1	ENSG00000117632	stathmin 1	-0.381002	0.0246434
CDK6	ENSG00000105810	cyclin dependent kinase 6	-0.381032	0.000849274
DLD	ENSG00000091140	dihydrolipoamide dehydrogenase	-0.381758	0.00133327
MRPS36	ENSG00000134056	mitochondrial ribosomal protein S36	-0.381925	0.0758035
TNS4	ENSG00000131746	tensin 4	-0.381998	0.0500614
PSD4	ENSG00000125637	pleckstrin and Sec7 domain containing 4	-0.382229	0.0769535
NUDT3	ENSG00000272325	nudix hydrolase 3	-0.382653	0.0168519
SLC2A1	ENSG00000117394	solute carrier family 2 member 1	-0.382865	0.0286805
PCCB	ENSG00000114054	propionyl-CoA carboxylase subunit beta	-0.383938	0.0298227
ATP2A2	ENSG00000174437	ATPase sarcoplasmic/endoplasmic reticulum Ca2+ transporting 2	-0.38657	0.0184453
ATG5	ENSG00000057663	autophagy related 5	-0.386917	0.0130621
MDH1	ENSG00000014641	malate dehydrogenase 1	-0.387013	0.000456386
BCL2L13	ENSG00000099968	BCL2 like 13	-0.38818	0.00012542
NPEPPS	ENSG00000141279	aminopeptidase puromycin sensitive	-0.388203	0.000142483
BRWD3	ENSG00000165288	bromodomain and WD repeat domain containing 3	-0.388782	0.0677959
ARL1	ENSG00000120805	ADP ribosylation factor like GTPase 1	-0.389602	0.00761936
AMMECR1	ENSG00000101935	AMMECR nuclear protein 1	-0.389995	0.073394
CPLANE1	ENSG00000197603	ciliogenesis and planar polarity effector 1	-0.390373	0.0785111
DHRS7	ENSG00000100612	dehydrogenase/reductase 7	-0.390423	0.0706913
TINF2	ENSG00000092330	TERF1 interacting nuclear factor 2	-0.390629	0.078874
ARID1A	ENSG00000117713	AT-rich interaction domain 1A	-0.390699	0.052569
FBXO34	ENSG00000178974	F-box protein 34	-0.390841	0.0796627
STAM2	ENSG00000115145	signal transducing adaptor molecule 2	-0.394981	0.0195276
CYTB	ENSG00000198727	mitochondrially encoded cytochrome b	-0.396545	0.000123054
NDUFC1	ENSG00000109390	NADH:ubiquinone oxidoreductase subunit C1	-0.39705	0.0332308
CRTAP	ENSG00000170275	cartilage associated protein	-0.397634	0.0133834
PRNP	ENSG00000171867	prion protein	-0.397666	0.022798
RHOT1	ENSG00000126858	ras homolog family member T1	-0.397704	0.0357033
DIDO1	ENSG00000101191	death inducer-obliterator 1	-0.397764	0.000537067
AP5S1	ENSG00000125843	adaptor related protein complex 5 subunit sigma 1	-0.399362	0.0183656
CDKN1B	ENSG00000111276	cyclin dependent kinase inhibitor 1B	-0.400259	0.0604619
KCTD10	ENSG00000110906	potassium channel tetramerization domain containing 10	-0.400269	0.0459465
NDUFA2	ENSG00000131495	NADH:ubiquinone oxidoreductase subunit A2	-0.400694	0.00961968
BID	ENSG00000015475	BH3 interacting domain death agonist	-0.400769	0.0375305
MAPKAP1	ENSG00000119487	MAPK associated protein 1	-0.401312	0.0589132
ARF3	ENSG00000134287	ADP ribosylation factor 3	-0.402023	0.0189271
ACOT13	ENSG00000112304	acyl-CoA thioesterase 13	-0.402224	0.0271871
RAP1A	ENSG00000116473	RAP1A, member of RAS oncogene family	-0.402936	0.0120015
TMEM87B	ENSG00000153214	transmembrane protein 87B	-0.404667	0.00213609
KLHDC2	ENSG00000165516	kelch domain containing 2	-0.404879	0.0677584
UQCRC1	ENSG00000010256	ubiquinol-cytochrome c reductase core protein 1	-0.404968	0.0565751
PALLD	ENSG00000129116	palladin, cytoskeletal associated protein	-0.405767	0.000282661
PPP1CB	ENSG00000213639	protein phosphatase 1 catalytic subunit beta	-0.406085	0.00164612
VAPA	ENSG00000101558	VAMP associated protein A	-0.406822	0.000246668
AK4	ENSG00000162433	adenylate kinase 4	-0.406975	0.00940911
RAB11A	ENSG00000103769	RAB11A, member RAS oncogene family	-0.407299	2.51418e-05
SEMA3A	ENSG00000075213	semaphorin 3A	-0.408222	0.000417132
ST14	ENSG00000149418	ST14 transmembrane serine protease matriptase	-0.408681	0.0139004
SEC24C	ENSG00000176986	SEC24 homolog C, COPII coat complex component	-0.409376	0.0656074
PRKCZ	ENSG00000067606	protein kinase C zeta	-0.409467	0.0777058
FLOT1	ENSG00000137312	flotillin 1	-0.409757	0.0390981
NAPRT	ENSG00000147813	nicotinate phosphoribosyltransferase	-0.409822	0.0791766
PTDSS1	ENSG00000156471	phosphatidylserine synthase 1	-0.409945	6.49554e-05
TMEM127	ENSG00000135956	transmembrane protein 127	-0.410132	0.00487568
CCNY	ENSG00000108100	cyclin Y	-0.410675	0.0109668
TSPAN3	ENSG00000140391	tetraspanin 3	-0.411201	0.0052358
SCRIB	ENSG00000180900	scribble planar cell polarity protein	-0.412279	0.0118477
NFU1	ENSG00000169599	NFU1 iron-sulfur cluster scaffold	-0.412469	0.0292717
SOS1	ENSG00000115904	SOS Ras/Rac guanine nucleotide exchange factor 1	-0.41414	0.0157944
NDFIP2	ENSG00000102471	Nedd4 family interacting protein 2	-0.41433	0.00150638
GSK3B	ENSG00000082701	glycogen synthase kinase 3 beta	-0.414987	0.000713368
CIAO2A	ENSG00000166797	cytosolic iron-sulfur assembly component 2A	-0.414998	0.00083994
KRCC1	ENSG00000172086	lysine rich coiled-coil 1	-0.415078	0.0401659
ENAH	ENSG00000154380	ENAH actin regulator	-0.415266	8.48341e-05
MNT	ENSG00000070444	MAX network transcriptional repressor	-0.415657	0.0689953
FBXO3	ENSG00000110429	F-box protein 3	-0.416022	0.0336827
ATP11A	ENSG00000068650	ATPase phospholipid transporting 11A	-0.416794	0.0904935
KCNK6	ENSG00000099337	potassium two pore domain channel subfamily K member 6	-0.416805	0.0123794
KLHL9	ENSG00000198642	kelch like family member 9	-0.418749	0.0415045
NEK9	ENSG00000119638	NIMA related kinase 9	-0.41976	0.0330371
FOCAD	ENSG00000188352	focadhesin	-0.419796	0.0383526
TSPAN15	ENSG00000099282	tetraspanin 15	-0.422022	0.063061
ZFYVE16	ENSG00000039319	zinc finger FYVE-type containing 16	-0.422717	0.0387973
ANKRD18A	ENSG00000180071	ankyrin repeat domain 18A	-0.423564	0.0991552
TBC1D22A	ENSG00000054611	TBC1 domain family member 22A	-0.424031	0.0753034
RAB2B	ENSG00000129472	RAB2B, member RAS oncogene family	-0.424308	0.0214507
NSF	ENSG00000073969	N-ethylmaleimide sensitive factor, vesicle fusing ATPase	-0.424614	0.0444364
ADD1	ENSG00000087274	adducin 1	-0.424921	0.00582977
ZNF431	ENSG00000196705	zinc finger protein 431	-0.427417	0.0240279
ZYG11B	ENSG00000162378	zyg-11 family member B, cell cycle regulator	-0.428362	0.0312979
DHRSX	ENSG00000169084	dehydrogenase/reductase X-linked	-0.429067	0.0588258
ETAA1	ENSG00000143971	ETAA1 activator of ATR kinase	-0.42926	0.0898029
RNH1	ENSG00000023191	ribonuclease/angiogenin inhibitor 1	-0.430582	0.0541199
SYNJ2BP	ENSG00000213463	synaptojanin 2 binding protein	-0.431291	0.0109668
CTSL	ENSG00000135047	cathepsin L	-0.431962	0.0356514
CSTB	ENSG00000160213	cystatin B	-0.432138	0.0709565
PEX2	ENSG00000164751	peroxisomal biogenesis factor 2	-0.432144	0.0575578
DYNLT1	ENSG00000146425	dynein light chain Tctex-type 1	-0.432719	0.00911062
MPC1	ENSG00000060762	mitochondrial pyruvate carrier 1	-0.433312	0.0120355
DPP3	ENSG00000254986	dipeptidyl peptidase 3	-0.433558	0.0206421
POR	ENSG00000127948	cytochrome p450 oxidoreductase	-0.434038	0.00295802
ANXA11	ENSG00000122359	annexin A11	-0.434962	0.000211109
EXO1	ENSG00000174371	exonuclease 1	-0.435055	0.0619522
DGCR2	ENSG00000070413	DiGeorge syndrome critical region gene 2	-0.435549	0.0193978
GTF2IRD1	ENSG00000006704	GTF2I repeat domain containing 1	-0.43559	0.0903879
RBM18	ENSG00000119446	RNA binding motif protein 18	-0.436257	0.00692525
ZC2HC1A	ENSG00000104427	zinc finger C2HC-type containing 1A	-0.436462	0.0240634
MBNL2	ENSG00000139793	muscleblind like splicing regulator 2	-0.436534	0.00898381
MFSD14C	ENSG00000196312	major facilitator superfamily domain containing 14C	-0.437269	0.0153713
TOM1L2	ENSG00000175662	target of myb1 like 2 membrane trafficking protein	-0.437825	0.0267031
PLEKHA1	ENSG00000107679	pleckstrin homology domain containing A1	-0.437869	0.0240634
INPP4B	ENSG00000109452	inositol polyphosphate-4-phosphatase type II B	-0.438118	0.000225694
COX7B	ENSG00000131174	cytochrome c oxidase subunit 7B	-0.438245	3.95952e-05
NNT	ENSG00000112992	nicotinamide nucleotide transhydrogenase	-0.43874	0.085784
HSD17B4	ENSG00000133835	hydroxysteroid 17-beta dehydrogenase 4	-0.439045	0.00610804
PJA2	ENSG00000198961	praja ring finger ubiquitin ligase 2	-0.441541	0.00938086
ETV6	ENSG00000139083	ETS variant transcription factor 6	-0.441871	0.0436376
BLVRA	ENSG00000106605	biliverdin reductase A	-0.44189	0.0319555
TRAM1	ENSG00000067167	translocation associated membrane protein 1	-0.441905	0.0330272
BMPR2	ENSG00000204217	bone morphogenetic protein receptor type 2	-0.441957	0.0452681
USP28	ENSG00000048028	ubiquitin specific peptidase 28	-0.442502	0.0372741
ARHGAP5	ENSG00000100852	Rho GTPase activating protein 5	-0.442837	0.000355605
COQ9	ENSG00000088682	coenzyme Q9	-0.442977	0.0919328
CCDC115	ENSG00000136710	coiled-coil domain containing 115	-0.443054	0.0338029
SLC35A3	ENSG00000117620	solute carrier family 35 member A3	-0.443311	0.0152693
THAP11	ENSG00000168286	THAP domain containing 11	-0.443538	0.0455192
MCM2	ENSG00000073111	minichromosome maintenance complex component 2	-0.443709	0.0898029
CLUAP1	ENSG00000103351	clusterin associated protein 1	-0.444025	0.00851647
[truncated: 1,380 more rows]

## Sheet: S1B
Supplementary Table S1B. Results of RNA-seq analysis. List of 751 genes differentially expressed at a false discovery rate (FDR) < 0.1 between SCC-25_EVI1 and SCC-25_vec cells.
Positive log2FoldChange values indicate up-regulation by EVI1; negative log2FoldChange values indicate down-regulation by EVI1.
Gene Symbol	Ensembl Gene ID	Description	log2FoldChange	FDR
MPPED2	ENSG00000066382	metallophosphoesterase domain containing 2	5.28326	0.000234473
DPP6	ENSG00000130226	dipeptidyl peptidase like 6	4.64791	0.00662962
PRSS12	ENSG00000164099	serine protease 12	4.61969	2.59524e-09
COLCA1	ENSG00000196167	colorectal cancer associated 1	4.54468	0.00331789
SLC47A1	ENSG00000142494	solute carrier family 47 member 1	4.42269	0.00538041
HSP90AB2P	ENSG00000205940	heat shock protein 90 alpha family class B member 2, pseudogene	4.3237	0.0154158
MYO5C	ENSG00000128833	myosin VC	4.22747	3.99702e-06
CP	ENSG00000047457	ceruloplasmin	4.09118	0.0968331
MMP12	ENSG00000262406	matrix metallopeptidase 12	4.0242	0.0788019
CLDN9	ENSG00000213937	claudin 9	3.96564	0.0299898
AP005233.2	ENSG00000260877	novel transcript	3.95854	0.0522926
DNAH11	ENSG00000105877	dynein axonemal heavy chain 11	3.82783	0.0562919
PARD3B	ENSG00000116117	par-3 family cell polarity regulator beta	3.79712	0.0430247
VTCN1	ENSG00000134258	V-set domain containing T cell activation inhibitor 1	3.69877	0.0381432
MMP10	ENSG00000166670	matrix metallopeptidase 10	3.59594	0.0419376
DIO2	ENSG00000211448	iodothyronine deiodinase 2	3.54529	1.91395e-16
ALDH1A1	ENSG00000165092	aldehyde dehydrogenase 1 family member A1	3.49564	1.01057e-06
SPTSSB	ENSG00000196542	serine palmitoyltransferase small subunit B	3.49379	0.00172348
PPARGC1A	ENSG00000109819	PPARG coactivator 1 alpha	3.42267	0.000321627
UGT8	ENSG00000174607	UDP glycosyltransferase 8	3.3994	4.17773e-15
SCIN	ENSG00000006747	scinderin	3.39898	0.00360025
PLAGL1	ENSG00000118495	PLAG1 like zinc finger 1	3.35721	2.33526e-06
APCDD1	ENSG00000154856	APC down-regulated 1	3.23125	0.00654493
ALPG	ENSG00000163286	alkaline phosphatase, germ cell	3.07495	0.0375059
KIT	ENSG00000157404	KIT proto-oncogene, receptor tyrosine kinase	2.95209	0.00709863
CFI	ENSG00000205403	complement factor I	2.94959	0.0986506
GGT6	ENSG00000167741	gamma-glutamyltransferase 6	2.90443	7.04345e-07
HSH2D	ENSG00000196684	hematopoietic SH2 domain containing	2.84546	0.029653
MAP7D2	ENSG00000184368	MAP7 domain containing 2	2.82024	0.000111638
MAML3	ENSG00000196782	mastermind like transcriptional coactivator 3	2.81863	0.095379
GAD1	ENSG00000128683	glutamate decarboxylase 1	2.81178	7.48071e-05
EGFL6	ENSG00000198759	EGF like domain multiple 6	2.80208	0.00418868
UCP2	ENSG00000175567	uncoupling protein 2	2.72352	0.0504662
SYNPO2	ENSG00000172403	synaptopodin 2	2.7145	0.000852704
PLAAT1	ENSG00000127252	phospholipase A and acyltransferase 1	2.67494	0.0788681
FAT4	ENSG00000196159	FAT atypical cadherin 4	2.66498	0.000806821
C2CD4A	ENSG00000198535	C2 calcium dependent domain containing 4A	2.66468	0.0732405
COLCA2	ENSG00000214290	colorectal cancer associated 2	2.66019	2.17968e-05
MEF2C	ENSG00000081189	myocyte enhancer factor 2C	2.63139	3.59785e-05
MAB21L4	ENSG00000172478	mab-21 like 4	2.58128	7.48071e-05
ANGPT1	ENSG00000154188	angiopoietin 1	2.55669	0.00110361
ST6GALNAC1	ENSG00000070526	ST6 N-acetylgalactosaminide alpha-2,6-sialyltransferase 1	2.5183	0.0464668
LINC00431	ENSG00000225760	long intergenic non-protein coding RNA 431	2.50477	0.00138062
ATP6V1C2	ENSG00000143882	ATPase H+ transporting V1 subunit C2	2.50254	0.0336192
SPNS2	ENSG00000183018	sphingolipid transporter 2	2.43774	0.000381764
GDA	ENSG00000119125	guanine deaminase	2.39938	1.93823e-13
LRG1	ENSG00000171236	leucine rich alpha-2-glycoprotein 1	2.31578	0.00454231
KCNQ1	ENSG00000053918	potassium voltage-gated channel subfamily Q member 1	2.28203	4.82956e-05
NOS1	ENSG00000089250	nitric oxide synthase 1	2.2748	7.44843e-06
TMTC1	ENSG00000133687	transmembrane O-mannosyltransferase targeting cadherins 1	2.26247	1.80381e-10
GCHFR	ENSG00000137880	GTP cyclohydrolase I feedback regulator	2.24916	0.0643864
SOX6	ENSG00000110693	SRY-box transcription factor 6	2.23987	0.000256027
PLAC8	ENSG00000145287	placenta associated 8	2.23214	0.0750678
TNNI2	ENSG00000130598	troponin I2, fast skeletal type	2.23198	0.0171434
NTRK2	ENSG00000148053	neurotrophic receptor tyrosine kinase 2	2.21033	3.4861e-13
FAM157C	ENSG00000260528	family with sequence similarity 157 member C	2.18295	0.0389167
GLS2	ENSG00000135423	glutaminase 2	2.15639	0.0654106
MIR99AHG	ENSG00000215386	mir-99a-let-7c cluster host gene	2.13874	0.0576782
ALPP	ENSG00000163283	alkaline phosphatase, placental	2.08218	0.0115013
MARCHF3	ENSG00000173926	membrane associated ring-CH-type finger 3	2.06593	0.0197741
PLS1	ENSG00000120756	plastin 1	2.0587	8.05762e-09
GMPR	ENSG00000137198	guanosine monophosphate reductase	2.0263	0.00132892
MAFA	ENSG00000182759	MAF bZIP transcription factor A	2.02274	0.000315963
SERPINF2	ENSG00000167711	serpin family F member 2	2.02223	0.0528908
SYT8	ENSG00000149043	synaptotagmin 8	1.97588	0.000865192
MYEOV	ENSG00000172927	myeloma overexpressed	1.96835	0.0301972
DOC2B	ENSG00000272636	double C2 domain beta	1.96554	0.0510341
ALDH3A1	ENSG00000108602	aldehyde dehydrogenase 3 family member A1	1.96478	0.00193472
ALX4	ENSG00000052850	ALX homeobox 4	1.93303	0.032509
AQP3	ENSG00000165272	aquaporin 3 (Gill blood group)	1.91592	0.00533664
TLCD4	ENSG00000152078	TLC domain containing 4	1.89693	2.32021e-08
BTC	ENSG00000174808	betacellulin	1.88247	0.0469832
SERPINF1	ENSG00000132386	serpin family F member 1	1.85805	0.041602
EGR3	ENSG00000179388	early growth response 3	1.83108	0.0899424
PSCA	ENSG00000167653	prostate stem cell antigen	1.81325	0.0114897
PTPRB	ENSG00000127329	protein tyrosine phosphatase receptor type B	1.80296	0.0589156
TTC39A	ENSG00000085831	tetratricopeptide repeat domain 39A	1.79925	0.0667333
MRC2	ENSG00000011028	mannose receptor C type 2	1.77155	0.000510755
CLDN3	ENSG00000165215	claudin 3	1.74352	0.082599
DMRT1	ENSG00000137090	doublesex and mab-3 related transcription factor 1	1.7413	0.0286227
EFHD1	ENSG00000115468	EF-hand domain family member D1	1.69883	0.00857795
MUC1	ENSG00000185499	mucin 1, cell surface associated	1.69554	0.00882933
ALDH1L1	ENSG00000144908	aldehyde dehydrogenase 1 family member L1	1.66338	0.0756023
SYCP2	ENSG00000196074	synaptonemal complex protein 2	1.65971	0.0604977
PDE5A	ENSG00000138735	phosphodiesterase 5A	1.65562	0.000148307
PTN	ENSG00000105894	pleiotrophin	1.64513	6.71439e-09
PPP2R2B	ENSG00000156475	protein phosphatase 2 regulatory subunit Bbeta	1.62002	0.000857146
CEL	ENSG00000170835	carboxyl ester lipase	1.61099	0.0150594
MMP1	ENSG00000196611	matrix metallopeptidase 1	1.60505	0.0942805
NPNT	ENSG00000168743	nephronectin	1.59953	3.61418e-05
ERICH2	ENSG00000239467	glutamate rich 2	1.59495	0.0951068
GLCCI1	ENSG00000106415	glucocorticoid induced 1	1.59283	0.000744146
IL20RA	ENSG00000016402	interleukin 20 receptor subunit alpha	1.57838	0.0192178
SAMD5	ENSG00000203727	sterile alpha motif domain containing 5	1.57085	1.71779e-05
MYRF	ENSG00000124920	myelin regulatory factor	1.56556	0.041888
SELENOP	ENSG00000250722	selenoprotein P	1.53934	0.0349789
METTL7A	ENSG00000185432	methyltransferase like 7A	1.53317	0.000527579
FAM171B	ENSG00000144369	family with sequence similarity 171 member B	1.51506	0.0307911
LINC01508	ENSG00000231107	long intergenic non-protein coding RNA 1508	1.50938	0.000916517
SESTD1	ENSG00000187231	SEC14 and spectrin domain containing 1	1.47609	1.22726e-08
AC009133.1	ENSG00000238045	novel transcript, antisense to C16orf53 and MVP	1.46114	0.0839379
SNCG	ENSG00000173267	synuclein gamma	1.4574	0.00253787
C15orf48	ENSG00000166920	chromosome 15 open reading frame 48	1.44918	0.0546753
BMF	ENSG00000104081	Bcl2 modifying factor	1.42201	0.0504709
SVIP	ENSG00000198168	small VCP interacting protein	1.4082	0.0145611
TSPAN1	ENSG00000117472	tetraspanin 1	1.39349	3.64162e-09
LINC01451	ENSG00000279141	long intergenic non-protein coding RNA 1451	1.39225	0.0206015
ISYNA1	ENSG00000105655	inositol-3-phosphate synthase 1	1.39123	0.0595945
TTLL7	ENSG00000137941	tubulin tyrosine ligase like 7	1.37872	0.011245
NPTXR	ENSG00000221890	neuronal pentraxin receptor	1.36632	3.16462e-06
FA2H	ENSG00000103089	fatty acid 2-hydroxylase	1.36342	0.0863177
AC090181.3	ENSG00000278991	TEC	1.35543	0.0777847
COL5A2	ENSG00000204262	collagen type V alpha 2 chain	1.35333	0.00795594
RAB40B	ENSG00000141542	RAB40B, member RAS oncogene family	1.34647	0.0787087
FOXA1	ENSG00000129514	forkhead box A1	1.32484	0.000229009
PRSS22	ENSG00000005001	serine protease 22	1.30684	0.0265707
AC007342.5	ENSG00000262714	novel transcript	1.29667	0.0286566
B3GNT3	ENSG00000179913	UDP-GlcNAc:betaGal beta-1,3-N-acetylglucosaminyltransferase 3	1.28951	0.0509793
MMP13	ENSG00000137745	matrix metallopeptidase 13	1.28299	0.0383982
TMPRSS13	ENSG00000137747	transmembrane serine protease 13	1.28062	0.0643864
EDIL3	ENSG00000164176	EGF like repeats and discoidin domains 3	1.27548	0.000491492
PLXDC2	ENSG00000120594	plexin domain containing 2	1.26667	0.000528934
UNC5B-AS1	ENSG00000237512	UNC5B antisense RNA 1	1.25174	0.0672892
FZD3	ENSG00000104290	frizzled class receptor 3	1.2512	0.000450391
RPS6KA5	ENSG00000100784	ribosomal protein S6 kinase A5	1.23758	3.74612e-05
LRRC37BP1	ENSG00000250462	leucine rich repeat containing 37B pseudogene 1	1.23629	0.0993531
ELF3	ENSG00000163435	E74 like ETS transcription factor 3	1.2252	9.62917e-06
SCNN1A	ENSG00000111319	sodium channel epithelial 1 subunit alpha	1.21857	0.00454231
PLPP1	ENSG00000067113	phospholipid phosphatase 1	1.21221	3.61418e-05
NANOS1	ENSG00000188613	nanos C2HC-type zinc finger 1	1.20488	0.0294144
TFB2M	ENSG00000162851	transcription factor B2, mitochondrial	1.19613	0.0545868
CAPNS2	ENSG00000256812	calpain small subunit 2	1.19529	0.0581469
GULP1	ENSG00000144366	GULP PTB domain containing engulfment adaptor 1	1.18892	5.75765e-08
SLITRK6	ENSG00000184564	SLIT and NTRK like family member 6	1.18855	0.0286227
TBC1D30	ENSG00000111490	TBC1 domain family member 30	1.17187	0.0114897
RSAD2	ENSG00000134321	radical S-adenosyl methionine domain containing 2	1.15582	0.0696272
CYBRD1	ENSG00000071967	cytochrome b reductase 1	1.13859	0.0843637
EPS8	ENSG00000151491	epidermal growth factor receptor pathway substrate 8	1.12672	1.391e-08
ASS1	ENSG00000130707	argininosuccinate synthase 1	1.1176	0.0286227
BARX1	ENSG00000131668	BARX homeobox 1	1.11445	0.000321627
ACSL5	ENSG00000197142	acyl-CoA synthetase long chain family member 5	1.11225	0.0154158
RTP4	ENSG00000136514	receptor transporter protein 4	1.11137	0.0166339
GABRA3	ENSG00000011677	gamma-aminobutyric acid type A receptor subunit alpha3	1.10761	0.0316725
GPD1L	ENSG00000152642	glycerol-3-phosphate dehydrogenase 1 like	1.0887	0.0389167
SLC52A1	ENSG00000132517	solute carrier family 52 member 1	1.07873	0.0402395
TMPRSS4	ENSG00000137648	transmembrane serine protease 4	1.07344	0.00516051
MXD3	ENSG00000213347	MAX dimerization protein 3	1.07316	0.0273702
ZFP36L2	ENSG00000152518	ZFP36 ring finger protein like 2	1.07272	2.37604e-07
TIAM2	ENSG00000146426	TIAM Rac1 associated GEF 2	1.06091	0.0351182
IKZF2	ENSG00000030419	IKAROS family zinc finger 2	1.053	0.00217958
RAMP1	ENSG00000132329	receptor activity modifying protein 1	1.04155	1.11431e-05
OTUD1	ENSG00000165312	OTU deubiquitinase 1	1.03519	0.000343061
ALDH5A1	ENSG00000112294	aldehyde dehydrogenase 5 family member A1	1.0305	0.0488879
GATA3	ENSG00000107485	GATA binding protein 3	1.01989	0.00614957
C16orf91	ENSG00000174109	chromosome 16 open reading frame 91	1.01656	0.0190231
MAP2	ENSG00000078018	microtubule associated protein 2	1.00759	0.00105
PIK3R3	ENSG00000117461	phosphoinositide-3-kinase regulatory subunit 3	1.00541	0.0303793
GOLGA2P5	ENSG00000238105	GOLGA2 pseudogene 5	0.983189	0.00277006
H2AW	ENSG00000181218	H2A.W histone	0.97611	0.0654106
EEPD1	ENSG00000122547	endonuclease/exonuclease/phosphatase family domain containing 1	0.966417	0.0643904
SASH1	ENSG00000111961	SAM and SH3 domain containing 1	0.962196	0.0519674
GFI1	ENSG00000162676	growth factor independent 1 transcriptional repressor	0.961279	0.00946555
SLC15A3	ENSG00000110446	solute carrier family 15 member 3	0.952183	0.00517578
CFH	ENSG00000000971	complement factor H	0.945231	0.0191707
HLA-F	ENSG00000204642	major histocompatibility complex, class I, F	0.942398	0.00901283
RTL8B	ENSG00000212747	retrotransposon Gag like 8B	0.937284	0.0138416
FGF2	ENSG00000138685	fibroblast growth factor 2	0.934606	0.0546753
NUP210	ENSG00000132182	nucleoporin 210	0.932375	0.0855489
KLHL25	ENSG00000183655	kelch like family member 25	0.926206	0.0756399
LTBP1	ENSG00000049323	latent transforming growth factor beta binding protein 1	0.924375	7.23684e-05
EXOC6	ENSG00000138190	exocyst complex component 6	0.920838	0.00603973
PAPSS2	ENSG00000198682	3'-phosphoadenosine 5'-phosphosulfate synthase 2	0.916909	0.0274869
CXXC5	ENSG00000171604	CXXC finger protein 5	0.910309	0.0145185
TRIM2	ENSG00000109654	tripartite motif containing 2	0.908617	0.0119789
DNAJC22	ENSG00000178401	DnaJ heat shock protein family (Hsp40) member C22	0.908076	0.0745891
FADS3	ENSG00000221968	fatty acid desaturase 3	0.906731	1.00233e-07
FGFR2	ENSG00000066468	fibroblast growth factor receptor 2	0.892059	5.66111e-05
SRGAP3	ENSG00000196220	SLIT-ROBO Rho GTPase activating protein 3	0.890432	0.0315434
FBXL17	ENSG00000145743	F-box and leucine rich repeat protein 17	0.89041	0.038839
LINC02541	ENSG00000230943	long intergenic non-protein coding RNA 2541	0.883371	0.0383982
NOTCH3	ENSG00000074181	notch receptor 3	0.879386	0.0810178
CD9	ENSG00000010278	CD9 molecule	0.874861	0.0895171
CA5B	ENSG00000169239	carbonic anhydrase 5B	0.87112	0.0159476
PLCE1	ENSG00000138193	phospholipase C epsilon 1	0.845591	0.00974065
AKT1	ENSG00000142208	AKT serine/threonine kinase 1	0.845192	0.0487069
TLE4	ENSG00000106829	TLE family member 4, transcriptional corepressor	0.844015	0.00854804
ATF7IP2	ENSG00000166669	activating transcription factor 7 interacting protein 2	0.833467	0.0330612
PAX9	ENSG00000198807	paired box 9	0.829285	0.00069144
PLPP3	ENSG00000162407	phospholipid phosphatase 3	0.826076	0.0504662
LYPD1	ENSG00000150551	LY6/PLAUR domain containing 1	0.825673	0.0206724
FGFR3	ENSG00000068078	fibroblast growth factor receptor 3	0.813468	0.0676996
FZD5	ENSG00000163251	frizzled class receptor 5	0.808417	0.00347596
FKBP5	ENSG00000096060	FKBP prolyl isomerase 5	0.799367	0.0829757
TM9SF2	ENSG00000125304	transmembrane 9 superfamily member 2	0.797004	0.000554124
PTAFR	ENSG00000169403	platelet activating factor receptor	0.796817	7.63469e-05
ERAP2	ENSG00000164308	endoplasmic reticulum aminopeptidase 2	0.786581	0.034315
RASSF6	ENSG00000169435	Ras association domain family member 6	0.773008	0.044664
IL18	ENSG00000150782	interleukin 18	0.772798	0.0366917
HERC5	ENSG00000138646	HECT and RLD domain containing E3 ubiquitin protein ligase 5	0.767795	0.0509544
AC007996.1	ENSG00000277534	novel transcript, sense intronic to KCTD1	0.766124	0.0384365
PGAM1	ENSG00000171314	phosphoglycerate mutase 1	0.762496	0.0886935
PGM2L1	ENSG00000165434	phosphoglucomutase 2 like 1	0.755259	0.00172026
NRARP	ENSG00000198435	NOTCH regulated ankyrin repeat protein	0.750243	0.0285275
LRFN4	ENSG00000173621	leucine rich repeat and fibronectin type III domain containing 4	0.748803	0.0256415
ABHD3	ENSG00000158201	abhydrolase domain containing 3, phospholipase	0.744596	0.0677208
ZDHHC21	ENSG00000175893	zinc finger DHHC-type palmitoyltransferase 21	0.741824	0.00429118
S100A4	ENSG00000196154	S100 calcium binding protein A4	0.739979	0.0228791
LMO7	ENSG00000136153	LIM domain 7	0.735809	0.0050796
LLGL2	ENSG00000073350	LLGL scribble cell polarity complex component 2	0.734143	0.0295567
H2AC6	ENSG00000180573	H2A clustered histone 6	0.727945	0.0175941
FSTL1	ENSG00000163430	follistatin like 1	0.725539	0.0214592
SYK	ENSG00000165025	spleen associated tyrosine kinase	0.725393	0.00750218
WNK2	ENSG00000165238	WNK lysine deficient protein kinase 2	0.724711	0.0111517
SMIM14	ENSG00000163683	small integral membrane protein 14	0.717312	0.0564091
CPNE8	ENSG00000139117	copine 8	0.715763	0.0252997
KSR1	ENSG00000141068	kinase suppressor of ras 1	0.713439	0.0863177
GCLC	ENSG00000001084	glutamate-cysteine ligase catalytic subunit	0.709299	0.0183505
MSX2	ENSG00000120149	msh homeobox 2	0.705152	0.0784709
CDKN2C	ENSG00000123080	cyclin dependent kinase inhibitor 2C	0.704051	0.0148764
CXCL16	ENSG00000161921	C-X-C motif chemokine ligand 16	0.693437	0.0104385
GAREM1	ENSG00000141441	GRB2 associated regulator of MAPK1 subtype 1	0.692855	0.0513012
LOC100507516	ENSG00000237807	novel transcript	0.690651	0.0666174
MICALL2	ENSG00000164877	MICAL like 2	0.689111	0.000561188
EMP2	ENSG00000213853	epithelial membrane protein 2	0.682074	0.000158474
MYO3B	ENSG00000071909	myosin IIIB	0.668081	0.0968144
CHMP4C	ENSG00000164695	charged multivesicular body protein 4C	0.665671	0.000906111
NKD2	ENSG00000145506	NKD inhibitor of WNT signaling pathway 2	0.658437	0.0909456
RFX7	ENSG00000181827	regulatory factor X7	0.64655	0.0435547
IGFBP7	ENSG00000163453	insulin like growth factor binding protein 7	0.644651	0.0487069
SOX2	ENSG00000181449	SRY-box transcription factor 2	0.641266	0.0383982
HOXA7	ENSG00000122592	homeobox A7	0.641136	0.00896136
ZBTB10	ENSG00000205189	zinc finger and BTB domain containing 10	0.639653	0.018985
SLC29A3	ENSG00000198246	solute carrier family 29 member 3	0.633242	0.0712131
UTRN	ENSG00000152818	utrophin	0.631476	4.62517e-05
GNAI1	ENSG00000127955	G protein subunit alpha i1	0.628506	0.0750678
INTU	ENSG00000164066	inturned planar cell polarity protein	0.626733	0.0395838
MITF	ENSG00000187098	melanocyte inducing transcription factor	0.625295	0.00589955
TFPI	ENSG00000003436	tissue factor pathway inhibitor	0.625109	0.00254922
AIFM2	ENSG00000042286	apoptosis inducing factor mitochondria associated 2	0.624108	8.12381e-06
NSMCE3	ENSG00000185115	NSE3 homolog, SMC5-SMC6 complex component	0.618068	0.0280769
CEBPD	ENSG00000221869	CCAAT enhancer binding protein delta	0.607697	0.0846506
PPIL2	ENSG00000100023	peptidylprolyl isomerase like 2	0.607371	0.0232269
DECR1	ENSG00000104325	2,4-dienoyl-CoA reductase 1	0.604313	0.0906207
ECH1	ENSG00000104823	enoyl-CoA hydratase 1	0.598993	0.0701851
UBQLN2	ENSG00000188021	ubiquilin 2	0.587881	0.00869566
RAB11FIP4	ENSG00000131242	RAB11 family interacting protein 4	0.586779	0.0349789
MCRIP2	ENSG00000172366	MAPK regulated corepressor interacting protein 2	0.582314	0.0247524
WRAP73	ENSG00000116213	WD repeat containing, antisense to TP73	0.581265	0.0908116
CASZ1	ENSG00000130940	castor zinc finger 1	0.575461	0.0275118
CAT	ENSG00000121691	catalase	0.573673	0.0144442
LNPEP	ENSG00000113441	leucyl and cystinyl aminopeptidase	0.566304	0.00436361
RNF144B	ENSG00000137393	ring finger protein 144B	0.563995	0.0362264
NIBAN1	ENSG00000135842	niban apoptosis regulator 1	0.558752	0.00717545
RILPL2	ENSG00000150977	Rab interacting lysosomal protein like 2	0.555461	0.0259871
AGPS	ENSG00000018510	alkylglycerone phosphate synthase	0.552012	0.00113517
AFDN	ENSG00000130396	afadin, adherens junction formation factor	0.550365	0.000372227
PSMB8	ENSG00000204264	proteasome 20S subunit beta 8	0.54891	0.00292868
ZNF395	ENSG00000186918	zinc finger protein 395	0.548475	0.0129904
RNF24	ENSG00000101236	ring finger protein 24	0.54302	0.0968144
FBXO46	ENSG00000177051	F-box protein 46	0.540284	0.0232269
CTSH	ENSG00000103811	cathepsin H	0.538017	0.00171639
LINS1	ENSG00000140471	lines homolog 1	0.533379	0.0784709
CKB	ENSG00000166165	creatine kinase B	0.530875	0.0147524
TM7SF3	ENSG00000064115	transmembrane 7 superfamily member 3	0.530665	0.00119963
BAG1	ENSG00000107262	BAG cochaperone 1	0.529635	0.0518508
ULK3	ENSG00000140474	unc-51 like kinase 3	0.52857	0.0487069
TSPAN15	ENSG00000099282	tetraspanin 15	0.519183	0.0485003
FOXQ1	ENSG00000164379	forkhead box Q1	0.510382	0.0318513
METTL17	ENSG00000165792	methyltransferase like 17	0.50908	0.050661
EMB	ENSG00000170571	embigin	0.503002	0.0666174
PHACTR2	ENSG00000112419	phosphatase and actin regulator 2	0.501838	0.00128063
MAP3K5	ENSG00000197442	mitogen-activated protein kinase kinase kinase 5	0.499889	0.060441
SKIL	ENSG00000136603	SKI like proto-oncogene	0.491977	0.000315963
HEXIM1	ENSG00000186834	HEXIM P-TEFb complex subunit 1	0.488798	0.0155703
SPINDOC	ENSG00000168005	spindlin interactor and repressor of chromatin binding	0.488231	0.0888546
CPT1A	ENSG00000110090	carnitine palmitoyltransferase 1A	0.486365	0.0183505
CLUAP1	ENSG00000103351	clusterin associated protein 1	0.485483	0.0102776
SMAD3	ENSG00000166949	SMAD family member 3	0.483153	0.0023799
RASEF	ENSG00000165105	RAS and EF-hand domain containing	0.482945	0.0560529
MSRB1	ENSG00000198736	methionine sulfoxide reductase B1	0.482506	0.0285275
RBM38	ENSG00000132819	RNA binding motif protein 38	0.480884	0.0105305
MRPL34	ENSG00000130312	mitochondrial ribosomal protein L34	0.480135	0.0275118
MGST2	ENSG00000085871	microsomal glutathione S-transferase 2	0.479282	0.0734382
TM4SF1	ENSG00000169908	transmembrane 4 L six family member 1	0.4776	0.00589706
IDH2	ENSG00000182054	isocitrate dehydrogenase (NADP(+)) 2	0.471298	0.0856083
BCOR	ENSG00000183337	BCL6 corepressor	0.469302	0.010138
SPIN4	ENSG00000186767	spindlin family member 4	0.468988	0.0138416
THADA	ENSG00000115970	THADA armadillo repeat containing	0.463651	0.0500926
CASP8	ENSG00000064012	caspase 8	0.463499	0.0434103
HMGB2	ENSG00000164104	high mobility group box 2	0.461309	0.0870406
TMEM123	ENSG00000152558	transmembrane protein 123	0.456753	0.000158474
HCLS1	ENSG00000180353	hematopoietic cell-specific Lyn substrate 1	0.454972	0.0384365
MTA3	ENSG00000057935	metastasis associated 1 family member 3	0.453022	0.0852862
PGAP4	ENSG00000165152	post-GPI attachment to proteins GalNAc transferase 4	0.447762	0.0955219
ALDH3A2	ENSG00000072210	aldehyde dehydrogenase 3 family member A2	0.444606	0.0286566
UBE2D1	ENSG00000072401	ubiquitin conjugating enzyme E2 D1	0.441252	0.0643864
PRDX3	ENSG00000165672	peroxiredoxin 3	0.433874	0.0822046
CDCA7	ENSG00000144354	cell division cycle associated 7	0.433218	0.0822573
EHD4	ENSG00000103966	EH domain containing 4	0.422515	0.0434103
LGALS8	ENSG00000116977	galectin 8	0.415723	0.0788681
ADI1	ENSG00000182551	acireductone dioxygenase 1	0.414659	0.000315696
HES1	ENSG00000114315	hes family bHLH transcription factor 1	0.394871	0.0316464
TMEM109	ENSG00000110108	transmembrane protein 109	0.388007	0.0374825
CXADR	ENSG00000154639	CXADR Ig-like cell adhesion molecule	0.380637	0.00289667
RBM47	ENSG00000163694	RNA binding motif protein 47	0.380498	0.0434103
RAB11FIP1	ENSG00000156675	RAB11 family interacting protein 1	0.377695	0.0735234
CST3	ENSG00000101439	cystatin C	0.377568	0.00338734
ATG14	ENSG00000126775	autophagy related 14	0.373305	0.0313269
USP25	ENSG00000155313	ubiquitin specific peptidase 25	0.37278	0.0690004
KRT7	ENSG00000135480	keratin 7	0.371612	0.0863177
COBLL1	ENSG00000082438	cordon-bleu WH2 repeat protein like 1	0.366292	0.0565714
ABRACL	ENSG00000146386	ABRA C-terminal like	0.358324	0.0745891
KLF13	ENSG00000169926	Kruppel like factor 13	0.355819	0.0402961
TRIM25	ENSG00000121060	tripartite motif containing 25	0.345013	0.0966886
ECI1	ENSG00000167969	enoyl-CoA delta isomerase 1	0.339832	0.0788019
OXA1L	ENSG00000155463	OXA1L mitochondrial inner membrane protein	0.33379	0.00172348
PTEN	ENSG00000171862	phosphatase and tensin homolog	0.333649	0.0765732
SLCO3A1	ENSG00000176463	solute carrier organic anion transporter family member 3A1	0.331829	0.0204651
NFE2L2	ENSG00000116044	nuclear factor, erythroid 2 like 2	0.329082	0.0469707
GNAQ	ENSG00000156052	G protein subunit alpha q	0.320443	0.000916517
TCEAL9	ENSG00000185222	transcription elongation factor A like 9	0.320132	0.0119789
LGALS3	ENSG00000131981	galectin 3	0.305715	0.0504971
COX7A2L	ENSG00000115944	cytochrome c oxidase subunit 7A2 like	0.304656	0.0286566
CISD1	ENSG00000122873	CDGSH iron sulfur domain 1	0.293696	0.0431127
TBL1XR1	ENSG00000177565	TBL1X receptor 1	0.291325	0.005979
COX6C	ENSG00000164919	cytochrome c oxidase subunit 6C	0.291012	0.0777847
ABLIM1	ENSG00000099204	actin binding LIM protein 1	0.289716	0.0968331
MAP3K2	ENSG00000169967	mitogen-activated protein kinase kinase kinase 2	0.282223	0.00306101
JPT2	ENSG00000206053	Jupiter microtubule associated homolog 2	0.275163	0.0639688
CBR1	ENSG00000159228	carbonyl reductase 1	0.263408	0.0968331
CBX6	ENSG00000183741	chromobox 6	0.254685	0.042643
EML4	ENSG00000143924	EMAP like 4	0.243205	0.0886252
RPLP1	ENSG00000137818	ribosomal protein lateral stalk subunit P1	0.195202	0.0286566
TMBIM6	ENSG00000139644	transmembrane BAX inhibitor motif containing 6	0.167673	0.0930916
DYNLRB1	ENSG00000125971	dynein light chain roadblock-type 1	-0.236801	0.0167056
TMED9	ENSG00000184840	transmembrane p24 trafficking protein 9	-0.24948	0.0811474
PPFIA1	ENSG00000131626	PTPRF interacting protein alpha 1	-0.253239	0.0482108
USP47	ENSG00000170242	ubiquitin specific peptidase 47	-0.253769	0.0777847
SF3B2	ENSG00000087365	splicing factor 3b subunit 2	-0.254479	0.0667333
PRRC2C	ENSG00000117523	proline rich coiled-coil 2C	-0.257565	0.0703757
ADIPOR2	ENSG00000006831	adiponectin receptor 2	-0.26683	0.0750678
SDC1	ENSG00000115884	syndecan 1	-0.268251	0.0446347
SMARCA5	ENSG00000153147	SWI/SNF related, matrix associated, actin dependent regulator of chromatin, subfamily a, member 5	-0.269646	0.00855204
SLC16A1	ENSG00000155380	solute carrier family 16 member 1	-0.270841	0.0921624
MYO1B	ENSG00000128641	myosin IB	-0.281538	0.0329613
STRAP	ENSG00000023734	serine/threonine kinase receptor associated protein	-0.282851	0.0875623
ATP6V1G1	ENSG00000136888	ATPase H+ transporting V1 subunit G1	-0.283499	0.00390645
MAP4	ENSG00000047849	microtubule associated protein 4	-0.285298	0.0765732
MYO10	ENSG00000145555	myosin X	-0.295601	0.068303
PPP3CA	ENSG00000138814	protein phosphatase 3 catalytic subunit alpha	-0.296369	0.0841795
PREPL	ENSG00000138078	prolyl endopeptidase like	-0.297074	0.0666307
SMC6	ENSG00000163029	structural maintenance of chromosomes 6	-0.299453	0.0863434
ZFP36L1	ENSG00000185650	ZFP36 ring finger protein like 1	-0.303933	0.0113249
PAK2	ENSG00000180370	p21 (RAC1) activated kinase 2	-0.306687	0.00882933
CDK6	ENSG00000105810	cyclin dependent kinase 6	-0.309187	0.0285275
RAB22A	ENSG00000124209	RAB22A, member RAS oncogene family	-0.312218	0.0119789
ASCC3	ENSG00000112249	activating signal cointegrator 1 complex subunit 3	-0.31382	0.082599
LUZP1	ENSG00000169641	leucine zipper protein 1	-0.319949	0.0129798
YIF1A	ENSG00000174851	Yip1 interacting factor homolog A, membrane trafficking protein	-0.320091	0.0852862
CBL	ENSG00000110395	Cbl proto-oncogene	-0.321792	0.0370637
AAK1	ENSG00000115977	AP2 associated kinase 1	-0.329002	0.0745891
KIF13A	ENSG00000137177	kinesin family member 13A	-0.331706	0.0286566
ZHX1	ENSG00000165156	zinc fingers and homeoboxes 1	-0.332491	0.0643864
STRN3	ENSG00000196792	striatin 3	-0.333031	0.0294144
LMAN1	ENSG00000074695	lectin, mannose binding 1	-0.334582	0.00388323
XXYLT1	ENSG00000173950	xyloside xylosyltransferase 1	-0.336459	0.0750678
GLS	ENSG00000115419	glutaminase	-0.337957	0.0231004
NPEPPS	ENSG00000141279	aminopeptidase puromycin sensitive	-0.338335	0.00555044
GSK3B	ENSG00000082701	glycogen synthase kinase 3 beta	-0.33897	0.0379198
YWHAZ	ENSG00000164924	tyrosine 3-monooxygenase/tryptophan 5-monooxygenase activation protein zeta	-0.343649	0.0118102
STK17A	ENSG00000164543	serine/threonine kinase 17a	-0.35058	0.0402395
ZNF462	ENSG00000148143	zinc finger protein 462	-0.358079	0.0487069
DNAJB1	ENSG00000132002	DnaJ heat shock protein family (Hsp40) member B1	-0.36124	0.0216711
CRYBG3	ENSG00000080200	crystallin beta-gamma domain containing 3	-0.362801	0.0932707
KIAA0040	ENSG00000235750	KIAA0040	-0.36352	0.0432148
ARL13B	ENSG00000169379	ADP ribosylation factor like GTPase 13B	-0.372448	0.0886252
GCLM	ENSG00000023909	glutamate-cysteine ligase modifier subunit	-0.372452	0.0619802
RIN2	ENSG00000132669	Ras and Rab interactor 2	-0.373682	0.00360025
CALU	ENSG00000128595	calumenin	-0.383727	0.00209412
SNRNP48	ENSG00000168566	small nuclear ribonucleoprotein U11/U12 subunit 48	-0.383893	0.0790917
IGFBP4	ENSG00000141753	insulin like growth factor binding protein 4	-0.384353	0.0342685
ELOF1	ENSG00000130165	elongation factor 1 homolog	-0.38447	0.0699166
FNBP1	ENSG00000187239	formin binding protein 1	-0.384794	0.0253172
ALCAM	ENSG00000170017	activated leukocyte cell adhesion molecule	-0.385915	0.00550899
ATP2B1	ENSG00000070961	ATPase plasma membrane Ca2+ transporting 1	-0.38685	0.0131263
ABHD17C	ENSG00000136379	abhydrolase domain containing 17C, depalmitoylase	-0.386895	0.0190231
CAST	ENSG00000153113	calpastatin	-0.386944	0.000498521
PCGF5	ENSG00000180628	polycomb group ring finger 5	-0.39103	0.0575908
LAMC1	ENSG00000135862	laminin subunit gamma 1	-0.391153	0.0119915
PYGL	ENSG00000100504	glycogen phosphorylase L	-0.393549	0.000772658
SLC39A6	ENSG00000141424	solute carrier family 39 member 6	-0.395728	0.0110498
COL4A2	ENSG00000134871	collagen type IV alpha 2 chain	-0.401661	0.0192178
NR3C1	ENSG00000113580	nuclear receptor subfamily 3 group C member 1	-0.401749	1.8724e-05
FBXW7	ENSG00000109670	F-box and WD repeat domain containing 7	-0.402586	0.0430963
CDCP1	ENSG00000163814	CUB domain containing protein 1	-0.410663	0.00429016
ITPK1	ENSG00000100605	inositol-tetrakisphosphate 1-kinase	-0.411907	0.0214538
MYO1E	ENSG00000157483	myosin IE	-0.420495	0.0639688
MAP4K4	ENSG00000071054	mitogen-activated protein kinase kinase kinase kinase 4	-0.420743	0.0402395
STIM1	ENSG00000167323	stromal interaction molecule 1	-0.422537	0.0193643
UCA1	ENSG00000214049	urothelial cancer associated 1	-0.42543	0.0324905
CSPG4	ENSG00000173546	chondroitin sulfate proteoglycan 4	-0.426409	0.0297796
CHST15	ENSG00000182022	carbohydrate sulfotransferase 15	-0.426542	0.0877866
GATAD2A	ENSG00000167491	GATA zinc finger domain containing 2A	-0.426542	0.065768
DPYD	ENSG00000188641	dihydropyrimidine dehydrogenase	-0.426935	0.0765732
SUCO	ENSG00000094975	SUN domain containing ossification factor	-0.428326	0.0338641
TSC22D2	ENSG00000196428	TSC22 domain family member 2	-0.428402	0.0726636
MFSD5	ENSG00000182544	major facilitator superfamily domain containing 5	-0.428572	0.0789144
FER	ENSG00000151422	FER tyrosine kinase	-0.429987	0.0213958
MXD1	ENSG00000059728	MAX dimerization protein 1	-0.433387	0.0921624
RBM10	ENSG00000182872	RNA binding motif protein 10	-0.434107	0.0479621
FAM189B	ENSG00000160767	family with sequence similarity 189 member B	-0.434743	0.0687894
POLD3	ENSG00000077514	DNA polymerase delta 3, accessory subunit	-0.435041	0.0792224
MAP2K4	ENSG00000065559	mitogen-activated protein kinase kinase 4	-0.439878	0.0141932
RALA	ENSG00000006451	RAS like proto-oncogene A	-0.440057	8.29334e-05
NDEL1	ENSG00000166579	nudE neurodevelopment protein 1 like 1	-0.44655	0.0643864
LAMB3	ENSG00000196878	laminin subunit beta 3	-0.44802	0.0666174
EHD2	ENSG00000024422	EH domain containing 2	-0.449344	0.0193949
FAM98A	ENSG00000119812	family with sequence similarity 98 member A	-0.450006	0.0419376
SPAG9	ENSG00000008294	sperm associated antigen 9	-0.451899	0.0030217
ELAVL2	ENSG00000107105	ELAV like RNA binding protein 2	-0.452796	0.0545868
ITPR2	ENSG00000123104	inositol 1,4,5-trisphosphate receptor type 2	-0.453548	0.0443437
NFE2L1	ENSG00000082641	nuclear factor, erythroid 2 like 1	-0.455272	0.0307911
SCAMP1	ENSG00000085365	secretory carrier membrane protein 1	-0.45891	0.0384529
DSE	ENSG00000111817	dermatan sulfate epimerase	-0.459151	0.034315
NFIB	ENSG00000147862	nuclear factor I B	-0.464103	0.0348432
SLK	ENSG00000065613	STE20 like kinase	-0.465292	2.00036e-06
SORL1	ENSG00000137642	sortilin related receptor 1	-0.467288	0.000102153
TMSB10	ENSG00000034510	thymosin beta 10	-0.46803	0.096063
CHD9	ENSG00000177200	chromodomain helicase DNA binding protein 9	-0.468572	0.00712275
ITGB1	ENSG00000150093	integrin subunit beta 1	-0.471382	0.000157472
RASIP1	ENSG00000105538	Ras interacting protein 1	-0.474549	0.0632089
MED27	ENSG00000160563	mediator complex subunit 27	-0.477682	0.00636606
COL17A1	ENSG00000065618	collagen type XVII alpha 1 chain	-0.482101	0.000280621
CREB3L2	ENSG00000182158	cAMP responsive element binding protein 3 like 2	-0.484206	0.034315
GPR87	ENSG00000138271	G protein-coupled receptor 87	-0.484881	0.0710821
RAI14	ENSG00000039560	retinoic acid induced 14	-0.486755	0.00533664
S100A11	ENSG00000163191	S100 calcium binding protein A11	-0.487484	0.0716923
MPRIP	ENSG00000133030	myosin phosphatase Rho interacting protein	-0.48966	0.012469
NIN	ENSG00000100503	ninein	-0.490445	0.0168651
RAB8B	ENSG00000166128	RAB8B, member RAS oncogene family	-0.490533	0.0784709
MUL1	ENSG00000090432	mitochondrial E3 ubiquitin protein ligase 1	-0.491405	0.0611123
HIPK2	ENSG00000064393	homeodomain interacting protein kinase 2	-0.492845	0.0125849
PHLDB2	ENSG00000144824	pleckstrin homology like domain family B member 2	-0.49379	0.0103958
CALD1	ENSG00000122786	caldesmon 1	-0.502493	3.65375e-06
ATL2	ENSG00000119787	atlastin GTPase 2	-0.503639	0.0649342
MAP3K20	ENSG00000091436	mitogen-activated protein kinase kinase kinase 20	-0.504521	0.00123331
ZNF703	ENSG00000183779	zinc finger protein 703	-0.506037	0.0611123
PDE7A	ENSG00000205268	phosphodiesterase 7A	-0.510015	0.0212142
RASAL2	ENSG00000075391	RAS protein activator like 2	-0.510154	0.00112203
CCM2	ENSG00000136280	CCM2 scaffold protein	-0.511537	0.000113379
RTTN	ENSG00000176225	rotatin	-0.513882	0.0787447
MYH10	ENSG00000133026	myosin heavy chain 10	-0.515817	0.0120459
DLGAP4	ENSG00000080845	DLG associated protein 4	-0.515982	0.0740076
SH3KBP1	ENSG00000147010	SH3 domain containing kinase binding protein 1	-0.518375	0.0348432
LRRC8C	ENSG00000171488	leucine rich repeat containing 8 VRAC subunit C	-0.52242	0.0610691
DIPK1A	ENSG00000154511	divergent protein kinase domain 1A	-0.526007	0.00539156
FANCB	ENSG00000181544	FA complementation group B	-0.526056	0.0383982
SLC22A23	ENSG00000137266	solute carrier family 22 member 23	-0.526253	0.00422537
CD59	ENSG00000085063	CD59 molecule (CD59 blood group)	-0.527911	0.000315696
KLF5	ENSG00000102554	Kruppel like factor 5	-0.528277	0.0241962
PFKFB3	ENSG00000170525	6-phosphofructo-2-kinase/fructose-2,6-biphosphatase 3	-0.528516	0.0872958
STK39	ENSG00000198648	serine/threonine kinase 39	-0.530811	0.00454231
RHOBTB3	ENSG00000164292	Rho related BTB domain containing 3	-0.532526	0.00934051
CARHSP1	ENSG00000153048	calcium regulated heat stable protein 1	-0.532706	0.0104024
LRP12	ENSG00000147650	LDL receptor related protein 12	-0.533064	0.0675717
MAN2A1	ENSG00000112893	mannosidase alpha class 2A member 1	-0.533432	0.00137069
PLOD3	ENSG00000106397	procollagen-lysine,2-oxoglutarate 5-dioxygenase 3	-0.534659	0.0885881
WDR54	ENSG00000005448	WD repeat domain 54	-0.535689	0.0384393
TBC1D10B	ENSG00000169221	TBC1 domain family member 10B	-0.538544	0.0500926
TFAP2C	ENSG00000087510	transcription factor AP-2 gamma	-0.539443	5.64378e-05
TNS4	ENSG00000131746	tensin 4	-0.543831	0.00494896
ITPRID2	ENSG00000138434	ITPR interacting domain containing 2	-0.546847	0.000728291
TSC22D1	ENSG00000102804	TSC22 domain family member 1	-0.550058	0.00648768
KCNQ1OT1	ENSG00000269821	KCNQ1 opposite strand/antisense transcript 1	-0.555746	0.0806443
IER3	ENSG00000137331	immediate early response 3	-0.557135	0.0506148
SOAT1	ENSG00000057252	sterol O-acyltransferase 1	-0.558509	0.00097691
BDKRB2	ENSG00000168398	bradykinin receptor B2	-0.562328	0.0229628
ZNF675	ENSG00000197372	zinc finger protein 675	-0.564933	0.0546753
RELB	ENSG00000104856	RELB proto-oncogene, NF-kB subunit	-0.566697	0.0903343
CD99	ENSG00000002586	CD99 molecule (Xg blood group)	-0.567982	0.00341959
S100A16	ENSG00000188643	S100 calcium binding protein A16	-0.568363	0.0014969
JAG1	ENSG00000101384	jagged canonical Notch ligand 1	-0.57344	0.00854804
EIF5A2	ENSG00000163577	eukaryotic translation initiation factor 5A2	-0.576508	0.0430247
CDH3	ENSG00000062038	cadherin 3	-0.576788	0.000937266
GJB5	ENSG00000189280	gap junction protein beta 5	-0.579548	0.0533535
PCDH1	ENSG00000156453	protocadherin 1	-0.580805	0.0117858
PRNP	ENSG00000171867	prion protein	-0.583012	0.00105334
NAV1	ENSG00000134369	neuron navigator 1	-0.587082	0.0268603
KLHL5	ENSG00000109790	kelch like family member 5	-0.594114	0.000488668
NMT2	ENSG00000152465	N-myristoyltransferase 2	-0.595159	0.0846506
MOB3B	ENSG00000120162	MOB kinase activator 3B	-0.598607	0.0248888
TENT5A	ENSG00000112773	terminal nucleotidyltransferase 5A	-0.60086	0.0577781
SH3PXD2A	ENSG00000107957	SH3 and PX domains 2A	-0.601419	0.0575908
ZNF219	ENSG00000165804	zinc finger protein 219	-0.602318	0.0456206
FRMD4A	ENSG00000151474	FERM domain containing 4A	-0.603008	0.00668383
LHFPL2	ENSG00000145685	LHFPL tetraspan subfamily member 2	-0.60503	0.0259583
SH3RF1	ENSG00000154447	SH3 domain containing ring finger 1	-0.606436	0.0315434
CLUHP3	ENSG00000131797	clustered mitochondria homolog pseudogene 3	-0.608432	0.0992502
GFOD1	ENSG00000145990	glucose-fructose oxidoreductase domain containing 1	-0.609328	0.00328549
CTNNB1	ENSG00000168036	catenin beta 1	-0.610065	4.54567e-15
ZC2HC1A	ENSG00000104427	zinc finger C2HC-type containing 1A	-0.610211	0.0863434
STC2	ENSG00000113739	stanniocalcin 2	-0.612787	0.0556073
CCDC152	ENSG00000198865	coiled-coil domain containing 152	-0.613702	0.000744146
CD276	ENSG00000103855	CD276 molecule	-0.613826	0.00462196
TGFBR2	ENSG00000163513	transforming growth factor beta receptor 2	-0.616358	0.0309324
SQLE	ENSG00000104549	squalene epoxidase	-0.619864	0.019277
ARHGAP29	ENSG00000137962	Rho GTPase activating protein 29	-0.620608	0.0193643
FGFBP1	ENSG00000137440	fibroblast growth factor binding protein 1	-0.620744	0.0613123
RIMKLB	ENSG00000166532	ribosomal modification protein rimK like family member B	-0.621712	0.0469832
MACF1	ENSG00000127603	microtubule actin crosslinking factor 1	-0.622422	1.08586e-06
LPGAT1	ENSG00000123684	lysophosphatidylglycerol acyltransferase 1	-0.626399	0.0027283
SOGA1	ENSG00000149639	suppressor of glucose, autophagy associated 1	-0.627283	0.00904141
NKX3-1	ENSG00000167034	NK3 homeobox 1	-0.630306	0.0920003
AMIGO2	ENSG00000139211	adhesion molecule with Ig like domain 2	-0.635197	0.0661521
IL20RB	ENSG00000174564	interleukin 20 receptor subunit beta	-0.638065	0.00533664
KDSR	ENSG00000119537	3-ketodihydrosphingosine reductase	-0.638504	3.61418e-05
AFAP1	ENSG00000196526	actin filament associated protein 1	-0.638527	0.0216025
EHF	ENSG00000135373	ETS homologous factor	-0.640232	0.00928783
EPHA1	ENSG00000146904	EPH receptor A1	-0.640642	0.0909456
ELL2	ENSG00000118985	elongation factor for RNA polymerase II 2	-0.643512	7.81943e-07
EN1	ENSG00000163064	engrailed homeobox 1	-0.643907	0.0431127
JARID2	ENSG00000008083	jumonji and AT-rich interaction domain containing 2	-0.647281	9.67368e-08
PMAIP1	ENSG00000141682	phorbol-12-myristate-13-acetate-induced protein 1	-0.65048	0.00100918
UACA	ENSG00000137831	uveal autoantigen with coiled-coil domains and ankyrin repeats	-0.652844	9.7351e-07
MTAP	ENSG00000099810	methylthioadenosine phosphorylase	-0.653573	0.00454231
IGSF3	ENSG00000143061	immunoglobulin superfamily member 3	-0.653648	0.000428974
GBP6	ENSG00000183347	guanylate binding protein family member 6	-0.654256	0.00904141
STXBP5	ENSG00000164506	syntaxin binding protein 5	-0.654827	0.00946555
KDM1B	ENSG00000165097	lysine demethylase 1B	-0.655469	0.0240585
TMEM104	ENSG00000109066	transmembrane protein 104	-0.656081	0.0984242
FLNB	ENSG00000136068	filamin B	-0.656605	2.42807e-06
TNFAIP3	ENSG00000118503	TNF alpha induced protein 3	-0.658497	0.0563824
TPM1	ENSG00000140416	tropomyosin 1	-0.661699	0.0687894
TENM3	ENSG00000218336	teneurin transmembrane protein 3	-0.66354	0.00032295
DAPP1	ENSG00000070190	dual adaptor of phosphotyrosine and 3-phosphoinositides 1	-0.667222	0.0446347
CAMK2N1	ENSG00000162545	calcium/calmodulin dependent protein kinase II inhibitor 1	-0.672941	1.8724e-05
LOXL2	ENSG00000134013	lysyl oxidase like 2	-0.67315	0.0667333
BNC1	ENSG00000169594	basonuclin 1	-0.674759	0.000459202
VAT1	ENSG00000108828	vesicle amine transport 1	-0.677445	0.00249524
SULF2	ENSG00000196562	sulfatase 2	-0.684987	0.0030217
RALGPS2	ENSG00000116191	Ral GEF with PH domain and SH3 binding motif 2	-0.691128	5.12029e-05
RPS6KC1	ENSG00000136643	ribosomal protein S6 kinase C1	-0.691827	0.0260458
FMNL2	ENSG00000157827	formin like 2	-0.691894	0.0114897
LTB4R	ENSG00000213903	leukotriene B4 receptor	-0.69505	0.0548461
DPYSL3	ENSG00000113657	dihydropyrimidinase like 3	-0.697259	0.00477062
TNFRSF21	ENSG00000146072	TNF receptor superfamily member 21	-0.6978	0.000323592
SLC31A2	ENSG00000136867	solute carrier family 31 member 2	-0.70073	0.0479215
ARL4D	ENSG00000175906	ADP ribosylation factor like GTPase 4D	-0.708681	0.00561822
OSBPL3	ENSG00000070882	oxysterol binding protein like 3	-0.710457	7.48071e-05
PPP1R26	ENSG00000196422	protein phosphatase 1 regulatory subunit 26	-0.712758	0.0138299
GSDME	ENSG00000105928	gasdermin E	-0.71859	8.33797e-05
CTSC	ENSG00000109861	cathepsin C	-0.71901	0.0475292
CD44	ENSG00000026508	CD44 molecule (Indian blood group)	-0.721003	0.00032295
DSEL	ENSG00000171451	dermatan sulfate epimerase like	-0.721335	0.0433414
EPB41L1	ENSG00000088367	erythrocyte membrane protein band 4.1 like 1	-0.725888	0.00994141
NME4	ENSG00000103202	NME/NM23 nucleoside diphosphate kinase 4	-0.728043	0.0160343
C1orf116	ENSG00000182795	chromosome 1 open reading frame 116	-0.728694	0.0348432
DAAM1	ENSG00000100592	dishevelled associated activator of morphogenesis 1	-0.729794	4.00443e-20
PIP4K2A	ENSG00000150867	phosphatidylinositol-5-phosphate 4-kinase type 2 alpha	-0.73695	0.000377463
IQSEC1	ENSG00000144711	IQ motif and Sec7 domain ArfGEF 1	-0.745396	0.0272603
HS3ST1	ENSG00000002587	heparan sulfate-glucosamine 3-sulfotransferase 1	-0.749251	0.0027283
SERPINB5	ENSG00000206075	serpin family B member 5	-0.750473	1.86402e-05
RALB	ENSG00000144118	RAS like proto-oncogene B	-0.751394	7.81943e-07
CITED4	ENSG00000179862	Cbp/p300 interacting transactivator with Glu/Asp rich carboxy-terminal domain 4	-0.752654	0.0785867
STARD13	ENSG00000133121	StAR related lipid transfer domain containing 13	-0.757688	0.0464668
LYST	ENSG00000143669	lysosomal trafficking regulator	-0.762745	0.00916603
SLC48A1	ENSG00000211584	solute carrier family 48 member 1	-0.763822	6.4405e-05
TUBB2A	ENSG00000137267	tubulin beta 2A class IIa	-0.770444	0.00376629
PTHLH	ENSG00000087494	parathyroid hormone like hormone	-0.770475	0.00188021
CTNNAL1	ENSG00000119326	catenin alpha like 1	-0.770788	0.0232269
GPR161	ENSG00000143147	G protein-coupled receptor 161	-0.774909	0.00239714
TMEM154	ENSG00000170006	transmembrane protein 154	-0.775925	6.66961e-06
PODXL	ENSG00000128567	podocalyxin like	-0.777017	0.0496972
PBX3	ENSG00000167081	PBX homeobox 3	-0.778752	0.000131575
POLR3G	ENSG00000113356	RNA polymerase III subunit G	-0.791722	0.025919
NHS	ENSG00000188158	NHS actin remodeling regulator	-0.810276	4.62517e-05
TMEM158	ENSG00000249992	transmembrane protein 158	-0.815374	0.0611123
PEG10	ENSG00000242265	paternally expressed 10	-0.818993	0.000377463
SERPINE2	ENSG00000135919	serpin family E member 2	-0.833873	1.32699e-08
TMEM65	ENSG00000164983	transmembrane protein 65	-0.873017	2.32021e-08
ITGA5	ENSG00000161638	integrin subunit alpha 5	-0.874643	0.0229628
CCDC3	ENSG00000151468	coiled-coil domain containing 3	-0.878063	0.0109373
KRT6A	ENSG00000205420	keratin 6A	-0.878304	0.0799254
ADD2	ENSG00000075340	adducin 2	-0.881242	0.0298082
MARCKSL1	ENSG00000175130	MARCKS like 1	-0.883812	0.0895171
PHLDA1	ENSG00000139289	pleckstrin homology like domain family A member 1	-0.885119	0.000286781
CDK14	ENSG00000058091	cyclin dependent kinase 14	-0.887092	0.000491492
KIFAP3	ENSG00000075945	kinesin associated protein 3	-0.889517	0.0219475
SMARCA1	ENSG00000102038	SWI/SNF related, matrix associated, actin dependent regulator of chromatin, subfamily a, member 1	-0.891927	0.0294086
NRG1	ENSG00000157168	neuregulin 1	-0.897227	0.000237896
FXYD5	ENSG00000089327	FXYD domain containing ion transport regulator 5	-0.902262	0.00176398
HBEGF	ENSG00000113070	heparin binding EGF like growth factor	-0.916812	0.0765652
ARSJ	ENSG00000180801	arylsulfatase family member J	-0.92373	0.000703114
TENM2	ENSG00000145934	teneurin transmembrane protein 2	-0.923847	1.62089e-09
ANO1	ENSG00000131620	anoctamin 1	-0.926016	5.44712e-07
PKIG	ENSG00000168734	cAMP-dependent protein kinase inhibitor gamma	-0.926795	0.0487069
SH3RF2	ENSG00000156463	SH3 domain containing ring finger 2	-0.926983	4.74204e-05
MICAL2	ENSG00000133816	microtubule associated monooxygenase, calponin and LIM domain containing 2	-0.928987	0.00678029
GPX3	ENSG00000211445	glutathione peroxidase 3	-0.92965	0.000844285
S100A14	ENSG00000189334	S100 calcium binding protein A14	-0.934893	3.33647e-15
MID2	ENSG00000080561	midline 2	-0.935042	0.0839379
S100A3	ENSG00000188015	S100 calcium binding protein A3	-0.937229	0.0734456
GJB2	ENSG00000165474	gap junction protein beta 2	-0.939376	0.0336924
C6orf141	ENSG00000197261	chromosome 6 open reading frame 141	-0.940521	0.000342551
CEMIP	ENSG00000103888	cell migration inducing hyaluronidase 1	-0.942223	0.016503
TAB3	ENSG00000157625	TGF-beta activated kinase 1 (MAP3K7) binding protein 3	-0.946651	0.00564981
TGFBI	ENSG00000120708	transforming growth factor beta induced	-0.953434	2.96663e-06
LAMA1	ENSG00000101680	laminin subunit alpha 1	-0.959171	0.0106854
C1orf21	ENSG00000116667	chromosome 1 open reading frame 21	-0.963401	0.00391106
EFNB2	ENSG00000125266	ephrin B2	-0.964367	0.000448916
PPFIBP1	ENSG00000110841	PPFIA binding protein 1	-0.9646	1.33739e-16
MELTF	ENSG00000163975	melanotransferrin	-0.966994	7.08849e-07
OLR1	ENSG00000173391	oxidized low density lipoprotein receptor 1	-0.967296	0.000236906
ST3GAL1	ENSG00000008513	ST3 beta-galactoside alpha-2,3-sialyltransferase 1	-0.967907	4.85568e-06
GJA1	ENSG00000152661	gap junction protein alpha 1	-0.973539	3.76928e-07
ABCC3	ENSG00000108846	ATP binding cassette subfamily C member 3	-0.982206	0.0402395
TIMP3	ENSG00000100234	TIMP metallopeptidase inhibitor 3	-0.988781	1.48435e-12
CERS3	ENSG00000154227	ceramide synthase 3	-0.993007	0.00148568
MN1	ENSG00000169184	MN1 proto-oncogene, transcriptional regulator	-1.00947	0.0125769
TTLL11	ENSG00000175764	tubulin tyrosine ligase like 11	-1.01158	0.0469832
PGBD1	ENSG00000137338	piggyBac transposable element derived 1	-1.01239	0.0745048
AC011369.2	ENSG00000279739	TEC	-1.01374	0.000886084
LINC01133	ENSG00000224259	long intergenic non-protein coding RNA 1133	-1.01422	0.0369434
DNMBP	ENSG00000107554	dynamin binding protein	-1.02324	0.000623746
RASAL2-AS1	ENSG00000224687	RASAL2 antisense RNA 1	-1.03956	0.0806443
HCAR2	ENSG00000182782	hydroxycarboxylic acid receptor 2	-1.05112	0.00734255
PANX1	ENSG00000110218	pannexin 1	-1.05318	0.000133652
ARSI	ENSG00000183876	arylsulfatase family member I	-1.05877	7.65597e-05
KRT14	ENSG00000186847	keratin 14	-1.06017	0.000228676
CTSV	ENSG00000136943	cathepsin V	-1.07353	0.00032295
RTN4RL1	ENSG00000185924	reticulon 4 receptor like 1	-1.07644	0.034315
PMP22	ENSG00000109099	peripheral myelin protein 22	-1.08584	0.0789144
FAM43A	ENSG00000185112	family with sequence similarity 43 member A	-1.08823	0.0285275
DSC2	ENSG00000134755	desmocollin 2	-1.10959	9.0858e-06
PHLPP2	ENSG00000040199	PH domain and leucine rich repeat protein phosphatase 2	-1.11063	0.00882933
THBS1	ENSG00000137801	thrombospondin 1	-1.11628	0.0533535
CNTN1	ENSG00000018236	contactin 1	-1.11884	0.0109373
RBP1	ENSG00000114115	retinol binding protein 1	-1.12461	1.23986e-05
LPXN	ENSG00000110031	leupaxin	-1.12898	0.00563244
SPINK5	ENSG00000133710	serine peptidase inhibitor Kazal type 5	-1.13153	0.0119789
TNC	ENSG00000041982	tenascin C	-1.14698	0.000252681
CNTNAP3	ENSG00000106714	contactin associated protein family member 3	-1.14983	0.00489495
PC	ENSG00000173599	pyruvate carboxylase	-1.15185	0.021957
GAS7	ENSG00000007237	growth arrest specific 7	-1.15315	0.0432148
RAB7B	ENSG00000276600	RAB7B, member RAS oncogene family	-1.15639	0.0158542
FLRT2	ENSG00000185070	fibronectin leucine rich transmembrane protein 2	-1.15747	8.86618e-13
NDRG4	ENSG00000103034	NDRG family member 4	-1.18552	0.000387037
MAPRE2	ENSG00000166974	microtubule associated protein RP/EB family member 2	-1.20267	2.22385e-06
RPL10P13	ENSG00000258245	ribosomal protein L10 pseudogene 13	-1.20596	0.0157268
PER3	ENSG00000049246	period circadian regulator 3	-1.20731	2.47618e-05
IL7R	ENSG00000168685	interleukin 7 receptor	-1.23542	3.4321e-07
AMOTL1	ENSG00000166025	angiomotin like 1	-1.24155	2.49463e-11
SLC16A9	ENSG00000165449	solute carrier family 16 member 9	-1.24593	0.00333647
LGALSL	ENSG00000119862	galectin like	-1.25131	0.00543587
POPDC3	ENSG00000132429	popeye domain containing 3	-1.27842	1.64311e-06
CDH2	ENSG00000170558	cadherin 2	-1.29742	0.00175133
NUP50-DT	ENSG00000226328	NUP50 divergent transcript	-1.32115	5.44712e-07
CREG2	ENSG00000175874	cellular repressor of E1A stimulated genes 2	-1.32695	3.32242e-08
PLAT	ENSG00000104368	plasminogen activator, tissue type	-1.33372	0.00667314
NID1	ENSG00000116962	nidogen 1	-1.34312	0.000765873
NRP1	ENSG00000099250	neuropilin 1	-1.35728	1.84312e-07
KLK5	ENSG00000167754	kallikrein related peptidase 5	-1.36973	1.14919e-11
CALML3	ENSG00000178363	calmodulin like 3	-1.36977	0.0144217
PID1	ENSG00000153823	phosphotyrosine interaction domain containing 1	-1.36995	0.0865332
THSD4	ENSG00000187720	thrombospondin type 1 domain containing 4	-1.37352	9.08754e-07
LY96	ENSG00000154589	lymphocyte antigen 96	-1.39345	0.0839379
PTGES	ENSG00000148344	prostaglandin E synthase	-1.39432	0.0183922
HTRA1	ENSG00000166033	HtrA serine peptidase 1	-1.39631	0.00429538
TMPRSS11D	ENSG00000153802	transmembrane serine protease 11D	-1.40234	0.0242898
MMP9	ENSG00000100985	matrix metallopeptidase 9	-1.40291	0.0699166
GNAL	ENSG00000141404	G protein subunit alpha L	-1.41462	0.0696147
JCAD	ENSG00000165757	junctional cadherin 5 associated	-1.42644	0.0154158
TLR6	ENSG00000174130	toll like receptor 6	-1.4333	3.24142e-07
KLK7	ENSG00000169035	kallikrein related peptidase 7	-1.43635	0.000137548
NIPAL4	ENSG00000172548	NIPA like domain containing 4	-1.44059	0.0930916
GRIP1	ENSG00000155974	glutamate receptor interacting protein 1	-1.44743	0.0218851
TGFB2	ENSG00000092969	transforming growth factor beta 2	-1.45129	0.0065387
MECOM	ENSG00000085276	MDS1 and EVI1 complex locus	-1.4539	4.99997e-12
ADAMTS15	ENSG00000166106	ADAM metallopeptidase with thrombospondin type 1 motif 15	-1.45562	2.50584e-06
TM4SF19	ENSG00000145107	transmembrane 4 L six family member 19	-1.46155	0.00239714
AC037198.1	ENSG00000276107	THBS1 intronic transcript 1	-1.46299	0.0528956
CD70	ENSG00000125726	CD70 molecule	-1.46655	0.00506308
AREG	ENSG00000109321	amphiregulin	-1.47681	8.62936e-05
BDKRB1	ENSG00000100739	bradykinin receptor B1	-1.49062	3.74612e-05
FCMR	ENSG00000162894	Fc fragment of IgM receptor	-1.50733	0.0745891
KCNMA1	ENSG00000156113	potassium calcium-activated channel subfamily M alpha 1	-1.50798	1.2226e-09
TNFRSF9	ENSG00000049249	TNF receptor superfamily member 9	-1.51062	0.0643864
STAMBPL1	ENSG00000138134	STAM binding protein like 1	-1.52106	0.00855204
SMIM3	ENSG00000256235	small integral membrane protein 3	-1.52687	3.38128e-05
GLI2	ENSG00000074047	GLI family zinc finger 2	-1.53892	0.050877
AL358334.2	ENSG00000258711	novel transcript	-1.5538	0.0548461
PSG4	ENSG00000243137	pregnancy specific beta-1-glycoprotein 4	-1.58327	0.00843982
KCNJ15	ENSG00000157551	potassium inwardly rectifying channel subfamily J member 15	-1.60813	3.16508e-09
DCBLD2	ENSG00000057019	discoidin, CUB and LCCL domain containing 2	-1.61632	1.3113e-17
NFASC	ENSG00000163531	neurofascin	-1.62153	0.0429253
IL1B	ENSG00000125538	interleukin 1 beta	-1.6252	0.000662862
ARHGEF26	ENSG00000114790	Rho guanine nucleotide exchange factor 26	-1.64387	0.00165926
ANKRD18A	ENSG00000180071	ankyrin repeat domain 18A	-1.6448	0.00232421
KLHL4	ENSG00000102271	kelch like family member 4	-1.66544	0.0233203
LTBP2	ENSG00000119681	latent transforming growth factor beta binding protein 2	-1.67413	1.73183e-07
DYSF	ENSG00000135636	dysferlin	-1.69074	0.0114353
IGFL2-AS1	ENSG00000268621	IGFL2 antisense RNA 1	-1.70463	6.14081e-08
NCKAP5	ENSG00000176771	NCK associated protein 5	-1.76763	1.6755e-12
SLC39A8	ENSG00000138821	solute carrier family 39 member 8	-1.77584	0.00148568
SEMA5A	ENSG00000112902	semaphorin 5A	-1.78028	0.0300476
COL13A1	ENSG00000197467	collagen type XIII alpha 1 chain	-1.79268	0.00864545
ADGRF4	ENSG00000153294	adhesion G protein-coupled receptor F4	-1.81219	0.000251915
SPOCK1	ENSG00000152377	SPARC (osteonectin), cwcv and kazal like domains proteoglycan 1	-1.81891	7.91365e-19
ROBO3	ENSG00000154134	roundabout guidance receptor 3	-1.84601	0.0716923
KIAA1549L	ENSG00000110427	KIAA1549 like	-1.89892	0.000806821
ALDH1A3	ENSG00000184254	aldehyde dehydrogenase 1 family member A3	-1.9024	3.12736e-24
ELOVL2	ENSG00000197977	ELOVL fatty acid elongase 2	-1.92229	0.0259871
FST	ENSG00000134363	follistatin	-1.93748	0.000703114
RF00493	ENSG00000201882		-1.96501	0.0765732
LINC01605	ENSG00000253414	long intergenic non-protein coding RNA 1605	-2.01038	0.0095035
INHBA	ENSG00000122641	inhibin subunit beta A	-2.02025	0.00193472
DUSP4	ENSG00000120875	dual specificity phosphatase 4	-2.05187	0.00120624
S100A9	ENSG00000163220	S100 calcium binding protein A9	-2.07091	0.0643864
ADAMTS12	ENSG00000151388	ADAM metallopeptidase with thrombospondin type 1 motif 12	-2.09443	0.00138062
LUCAT1	ENSG00000248323	lung cancer associated transcript 1	-2.13222	0.0462995
IRX1	ENSG00000170549	iroquois homeobox 1	-2.33773	0.00328644
SERPINB7	ENSG00000166396	serpin family B member 7	-2.34329	0.0968331
WNT5B	ENSG00000111186	Wnt family member 5B	-2.36675	0.000582203
RNASE7	ENSG00000165799	ribonuclease A family member 7	-2.40473	0.0169751
TNIK	ENSG00000154310	TRAF2 and NCK interacting kinase	-2.44889	1.68181e-19
CDH11	ENSG00000140937	cadherin 11	-2.49195	0.0402038
EML5	ENSG00000165521	EMAP like 5	-2.52505	0.00117497
DNER	ENSG00000187957	delta/notch like EGF repeat containing	-2.52749	0.000258461
CEP112	ENSG00000154240	centrosomal protein 112	-2.53355	0.0631265
FLRT3	ENSG00000125848	fibronectin leucine rich transmembrane protein 3	-2.61516	2.77613e-08
SH3TC2-DT	ENSG00000250072	SH3TC2 divergent transcript	-2.63586	0.00900998
KRT6B	ENSG00000185479	keratin 6B	-2.71169	6.03607e-06
AC090114.3	ENSG00000280828	pseudogene similar to part of tousled-like kinase 2 (TLK2)	-2.73295	0.0810178
MTSS1	ENSG00000170873	MTSS I-BAR domain containing 1	-2.80821	8.25596e-19
FN1	ENSG00000115414	fibronectin 1	-2.84815	1.32699e-08
ZBED2	ENSG00000177494	zinc finger BED-type containing 2	-2.94369	3.38409e-06
PAPPA	ENSG00000182752	pappalysin 1	-3.1752	1.3708e-08
ANXA10	ENSG00000109511	annexin A10	-3.24838	0.000716321
EIF5AL1	ENSG00000253626	eukaryotic translation initiation factor 5A like 1	-3.25038	0.0398539
NAV3	ENSG00000067798	neuron navigator 3	-3.2566	1.0499e-07
ABCA12	ENSG00000144452	ATP binding cassette subfamily A member 12	-3.34318	0.0666174
DHRS9	ENSG00000073737	dehydrogenase/reductase 9	-3.5039	0.0114897
ADAMTS16	ENSG00000145536	ADAM metallopeptidase with thrombospondin type 1 motif 16	-3.55571	0.0539093
SLC22A4	ENSG00000197208	solute carrier family 22 member 4	-3.55608	0.0863177
GFPT2	ENSG00000131459	glutamine-fructose-6-phosphate transaminase 2	-3.65281	0.000600742
LINC02677; LASTR	ENSG00000242147	lncRNA associated with SART3 regulation of splicing	-3.70596	0.000665495
PGBD5	ENSG00000177614	piggyBac transposable element derived 5	-3.82902	0.0395838
MAMDC2	ENSG00000165072	MAM domain containing 2	-3.94817	0.0228791
LOC105375519	ENSG00000273297	novel transcript	-3.95025	0.042927
SFRP1	ENSG00000104332	secreted frizzled related protein 1	-4.51643	3.63401e-151
RDH16	ENSG00000139547	retinol dehydrogenase 16	-4.61669	0.00462584

## Sheet: S1C
Supplementary Table S1C. Results of RNA-seq analysis. List of 252 genes whose expression was significantly altered in the same direction upon experimental expression of EVI1 in CAL-33 and SCC-25 cells (100 genes that were regulated in opposite directions in the two cell lines are not listed).
Positive log2FoldChange values indicate up-regulation by EVI1; negative log2FoldChange values indicate down-regulation by EVI1.
			CAL-33		SCC-25
Gene Symbol	Ensembl Gene ID	Description	log2FoldChange	FDR	log2FoldChange	FDR
SAMD5	ENSG00000203727	sterile alpha motif domain containing 5	5.22555	4.53581e-16	1.57085	1.71779e-05
NKD2	ENSG00000145506	NKD inhibitor of WNT signaling pathway 2	5.17893	4.48874e-05	0.658437	0.0909456
DPP6	ENSG00000130226	dipeptidyl peptidase like 6	3.71592	0.0160451	4.64791	0.00662962
DIO2	ENSG00000211448	iodothyronine deiodinase 2	3.54893	3.10079e-11	3.54529	1.91395e-16
NOS1	ENSG00000089250	nitric oxide synthase 1	3.42773	3.33357e-18	2.2748	7.44843e-06
MAP7D2	ENSG00000184368	MAP7 domain containing 2	2.52134	4.62999e-08	2.82024	0.000111638
ALPP	ENSG00000163283	alkaline phosphatase, placental	2.3942	0.000193366	2.08218	0.0115013
GMPR	ENSG00000137198	guanosine monophosphate reductase	2.30939	0.000178421	2.0263	0.00132892
PARD3B	ENSG00000116117	par-3 family cell polarity regulator beta	2.11416	0.0617797	3.79712	0.0430247
DMRT1	ENSG00000137090	doublesex and mab-3 related transcription factor 1	1.97655	0.0246223	1.7413	0.0286227
TNNI2	ENSG00000130598	troponin I2, fast skeletal type	1.95275	0.0829126	2.23198	0.0171434
MYO3B	ENSG00000071909	myosin IIIB	1.85075	6.27568e-10	0.668081	0.0968144
MAB21L4	ENSG00000172478	mab-21 like 4	1.84102	4.23883e-08	2.58128	7.48071e-05
BARX1	ENSG00000131668	BARX homeobox 1	1.73728	0.000499156	1.11445	0.000321627
KCNQ1	ENSG00000053918	potassium voltage-gated channel subfamily Q member 1	1.63199	0.0116667	2.28203	4.82956e-05
LINC00431	ENSG00000225760	long intergenic non-protein coding RNA 431	1.5298	0.00884825	2.50477	0.00138062
TTLL7	ENSG00000137941	tubulin tyrosine ligase like 7	1.46685	0.00417804	1.37872	0.011245
RAMP1	ENSG00000132329	receptor activity modifying protein 1	1.37937	1.58218e-11	1.04155	1.11431e-05
TMPRSS13	ENSG00000137747	transmembrane serine protease 13	1.37657	0.00709831	1.28062	0.0643864
FADS3	ENSG00000221968	fatty acid desaturase 3	1.32522	6.13367e-15	0.906731	1.00233e-07
HCLS1	ENSG00000180353	hematopoietic cell-specific Lyn substrate 1	1.29142	0.0506515	0.454972	0.0384365
MEF2C	ENSG00000081189	myocyte enhancer factor 2C	1.26425	0.0378595	2.63139	3.59785e-05
MUC1	ENSG00000185499	mucin 1, cell surface associated	1.22026	0.0342426	1.69554	0.00882933
GGT6	ENSG00000167741	gamma-glutamyltransferase 6	1.21578	0.000962648	2.90443	7.04345e-07
MYEOV	ENSG00000172927	myeloma overexpressed	1.21206	0.00168678	1.96835	0.0301972
RSAD2	ENSG00000134321	radical S-adenosyl methionine domain containing 2	1.19613	0.009545	1.15582	0.0696272
TSPAN1	ENSG00000117472	tetraspanin 1	1.16538	1.77852e-09	1.39349	3.64162e-09
RASSF6	ENSG00000169435	Ras association domain family member 6	1.1023	5.38844e-06	0.773008	0.044664
B3GNT3	ENSG00000179913	UDP-GlcNAc:betaGal beta-1,3-N-acetylglucosaminyltransferase 3	1.08848	0.00010931	1.28951	0.0509793
LTBP1	ENSG00000049323	latent transforming growth factor beta binding protein 1	1.03634	0.000230265	0.924375	7.23684e-05
HERC5	ENSG00000138646	HECT and RLD domain containing E3 ubiquitin protein ligase 5	1.01353	0.000535219	0.767795	0.0509544
TCEAL9	ENSG00000185222	transcription elongation factor A like 9	0.989873	1.13349e-23	0.320132	0.0119789
TBC1D30	ENSG00000111490	TBC1 domain family member 30	0.978329	0.000189784	1.17187	0.0114897
KLF13	ENSG00000169926	Kruppel like factor 13	0.970268	3.62354e-12	0.355819	0.0402961
AIFM2	ENSG00000042286	apoptosis inducing factor mitochondria associated 2	0.957153	8.87985e-11	0.624108	8.12381e-06
NPTXR	ENSG00000221890	neuronal pentraxin receptor	0.940582	0.00037839	1.36632	3.16462e-06
PDE5A	ENSG00000138735	phosphodiesterase 5A	0.94038	0.00108435	1.65562	0.000148307
MAP2	ENSG00000078018	microtubule associated protein 2	0.903778	0.00132143	1.00759	0.00105
S100A4	ENSG00000196154	S100 calcium binding protein A4	0.89793	0.00221165	0.739979	0.0228791
SLC15A3	ENSG00000110446	solute carrier family 15 member 3	0.834187	0.00806324	0.952183	0.00517578
NTRK2	ENSG00000148053	neurotrophic receptor tyrosine kinase 2	0.831162	0.0246055	2.21033	3.4861e-13
UGT8	ENSG00000174607	UDP glycosyltransferase 8	0.793264	0.00176882	3.3994	4.17773e-15
TLCD4	ENSG00000152078	TLC domain containing 4	0.787505	0.00954159	1.89693	2.32021e-08
BCOR	ENSG00000183337	BCL6 corepressor	0.783239	1.80686e-07	0.469302	0.010138
IGFBP7	ENSG00000163453	insulin like growth factor binding protein 7	0.771835	0.00249611	0.644651	0.0487069
NRARP	ENSG00000198435	NOTCH regulated ankyrin repeat protein	0.762878	0.00744855	0.750243	0.0285275
FGF2	ENSG00000138685	fibroblast growth factor 2	0.736902	0.00599129	0.934606	0.0546753
PLS1	ENSG00000120756	plastin 1	0.669103	0.000948676	2.0587	8.05762e-09
MSX2	ENSG00000120149	msh homeobox 2	0.638249	0.068018	0.705152	0.0784709
OTUD1	ENSG00000165312	OTU deubiquitinase 1	0.611901	0.0465368	1.03519	0.000343061
LRFN4	ENSG00000173621	leucine rich repeat and fibronectin type III domain containing 4	0.592473	0.0742954	0.748803	0.0256415
ACSL5	ENSG00000197142	acyl-CoA synthetase long chain family member 5	0.586535	0.0616405	1.11225	0.0154158
FSTL1	ENSG00000163430	follistatin like 1	0.58556	0.0118477	0.725539	0.0214592
RAB11FIP1	ENSG00000156675	RAB11 family interacting protein 1	0.580552	0.000392688	0.377695	0.0735234
GLCCI1	ENSG00000106415	glucocorticoid induced 1	0.57574	0.0954217	1.59283	0.000744146
MICALL2	ENSG00000164877	MICAL like 2	0.574814	0.000634731	0.689111	0.000561188
CKB	ENSG00000166165	creatine kinase B	0.570625	0.00296993	0.530875	0.0147524
SKIL	ENSG00000136603	SKI like proto-oncogene	0.554264	1.50578e-05	0.491977	0.000315963
PTAFR	ENSG00000169403	platelet activating factor receptor	0.544459	0.00483262	0.796817	7.63469e-05
ZFP36L2	ENSG00000152518	ZFP36 ring finger protein like 2	0.527688	0.018619	1.07272	2.37604e-07
CPT1A	ENSG00000110090	carnitine palmitoyltransferase 1A	0.508219	0.00404548	0.486365	0.0183505
AC007342.5	ENSG00000262714	novel transcript]	0.497223	0.0741731	1.29667	0.0286566
THADA	ENSG00000115970	THADA armadillo repeat containing	0.478937	0.00979896	0.463651	0.0500926
RBM38	ENSG00000132819	RNA binding motif protein 38	0.449883	0.00201108	0.480884	0.0105305
CXADR	ENSG00000154639	CXADR Ig-like cell adhesion molecule	0.383642	0.00112679	0.380637	0.00289667
COBLL1	ENSG00000082438	cordon-bleu WH2 repeat protein like 1	0.383239	0.00883393	0.366292	0.0565714
ABLIM1	ENSG00000099204	actin binding LIM protein 1	0.382278	0.00110349	0.289716	0.0968331
PHACTR2	ENSG00000112419	phosphatase and actin regulator 2	0.368124	0.0131934	0.501838	0.00128063
CBR1	ENSG00000159228	carbonyl reductase 1	0.300934	0.0172533	0.263408	0.0968331
ADI1	ENSG00000182551	acireductone dioxygenase 1	0.298609	0.00681546	0.414659	0.000315696
CST3	ENSG00000101439	cystatin C	0.221298	0.0573469	0.377568	0.00338734
DYNLRB1	ENSG00000125971	dynein light chain roadblock-type 1	-0.156177	0.0940301	-0.236801	0.0167056
RIN2	ENSG00000132669	Ras and Rab interactor 2	-0.232908	0.0501851	-0.373682	0.00360025
NR3C1	ENSG00000113580	nuclear receptor subfamily 3 group C member 1	-0.237646	0.0118196	-0.401749	1.8724e-05
ZFP36L1	ENSG00000185650	ZFP36 ring finger protein like 1	-0.253056	0.020496	-0.303933	0.0113249
ELL2	ENSG00000118985	elongation factor for RNA polymerase II 2	-0.280179	0.0712824	-0.643512	7.81943e-07
ALCAM	ENSG00000170017	activated leukocyte cell adhesion molecule	-0.294937	0.0212961	-0.385915	0.00550899
SLK	ENSG00000065613	STE20 like kinase	-0.329069	0.00103223	-0.465292	2.00036e-06
OSBPL3	ENSG00000070882	oxysterol binding protein like 3	-0.339816	0.0475404	-0.710457	7.48071e-05
CREB3L2	ENSG00000182158	cAMP responsive element binding protein 3 like 2	-0.376776	0.0741731	-0.484206	0.034315
ITPR2	ENSG00000123104	inositol 1,4,5-trisphosphate receptor type 2	-0.377315	0.0358799	-0.453548	0.0443437
CDK6	ENSG00000105810	cyclin dependent kinase 6	-0.381032	0.000849274	-0.309187	0.0285275
TNS4	ENSG00000131746	tensin 4	-0.381998	0.0500614	-0.543831	0.00494896
NPEPPS	ENSG00000141279	aminopeptidase puromycin sensitive	-0.388203	0.000142483	-0.338335	0.00555044
PRNP	ENSG00000171867	prion protein	-0.397666	0.022798	-0.583012	0.00105334
GSK3B	ENSG00000082701	glycogen synthase kinase 3 beta	-0.414987	0.000713368	-0.33897	0.0379198
ANKRD18A	ENSG00000180071	ankyrin repeat domain 18A	-0.423564	0.0991552	-1.6448	0.00232421
ZC2HC1A	ENSG00000104427	zinc finger C2HC-type containing 1A	-0.436462	0.0240634	-0.610211	0.0863434
SCAMP1	ENSG00000085365	secretory carrier membrane protein 1	-0.446702	0.00244836	-0.45891	0.0384529
CHD9	ENSG00000177200	chromodomain helicase DNA binding protein 9	-0.469555	0.00200932	-0.468572	0.00712275
PYGL	ENSG00000100504	glycogen phosphorylase L	-0.482123	8.07876e-06	-0.393549	0.000772658
S100A11	ENSG00000163191	S100 calcium binding protein A11	-0.486619	0.0237491	-0.487484	0.0716923
TSC22D1	ENSG00000102804	TSC22 domain family member 1	-0.489372	0.0090676	-0.550058	0.00648768
CDH3	ENSG00000062038	cadherin 3	-0.496474	0.00333097	-0.576788	0.000937266
NRP1	ENSG00000099250	neuropilin 1	-0.50545	0.0544365	-1.35728	1.84312e-07
COL4A2	ENSG00000134871	collagen type IV alpha 2 chain	-0.507267	0.00228408	-0.401661	0.0192178
CTSC	ENSG00000109861	cathepsin C	-0.512069	0.0938839	-0.71901	0.0475292
UACA	ENSG00000137831	uveal autoantigen with coiled-coil domains and ankyrin repeats	-0.518624	0.000152988	-0.652844	9.7351e-07
JAG1	ENSG00000101384	jagged canonical Notch ligand 1	-0.52375	0.0074319	-0.57344	0.00854804
CAST	ENSG00000153113	calpastatin	-0.526868	3.13669e-08	-0.386944	0.000498521
MOB3B	ENSG00000120162	MOB kinase activator 3B	-0.53686	0.0207058	-0.598607	0.0248888
CRYBG3	ENSG00000080200	crystallin beta-gamma domain containing 3	-0.539531	0.000141511	-0.362801	0.0932707
NFE2L1	ENSG00000082641	nuclear factor, erythroid 2 like 1	-0.543792	0.00185637	-0.455272	0.0307911
JARID2	ENSG00000008083	jumonji and AT-rich interaction domain containing 2	-0.562483	4.79294e-05	-0.647281	9.67368e-08
FLNB	ENSG00000136068	filamin B	-0.566635	0.000182773	-0.656605	2.42807e-06
PPP1R26	ENSG00000196422	protein phosphatase 1 regulatory subunit 26	-0.576455	0.0533678	-0.712758	0.0138299
KDSR	ENSG00000119537	3-ketodihydrosphingosine reductase	-0.584404	0.000280139	-0.638504	3.61418e-05
TMEM65	ENSG00000164983	transmembrane protein 65	-0.608235	0.000228337	-0.873017	2.32021e-08
FNBP1	ENSG00000187239	formin binding protein 1	-0.608312	9.06972e-06	-0.384794	0.0253172
ARSI	ENSG00000183876	arylsulfatase family member I	-0.613828	0.0521738	-1.05877	7.65597e-05
AMOTL1	ENSG00000166025	angiomotin like 1	-0.621897	0.000303475	-1.24155	2.49463e-11
GJA1	ENSG00000152661	gap junction protein alpha 1	-0.622949	0.00686354	-0.973539	3.76928e-07
RASAL2	ENSG00000075391	RAS protein activator like 2	-0.626446	1.7912e-05	-0.510154	0.00112203
C6orf141	ENSG00000197261	chromosome 6 open reading frame 141	-0.633436	0.0228193	-0.940521	0.000342551
RALGPS2	ENSG00000116191	Ral GEF with PH domain and SH3 binding motif 2	-0.645103	0.000178421	-0.691128	5.12029e-05
CALD1	ENSG00000122786	caldesmon 1	-0.646446	1.27399e-05	-0.502493	3.65375e-06
CARHSP1	ENSG00000153048	calcium regulated heat stable protein 1	-0.656661	0.000122804	-0.532706	0.0104024
SOAT1	ENSG00000057252	sterol O-acyltransferase 1	-0.668618	0.00016566	-0.558509	0.00097691
PTHLH	ENSG00000087494	parathyroid hormone like hormone	-0.679322	0.0124789	-0.770475	0.00188021
GFOD1	ENSG00000145990	glucose-fructose oxidoreductase domain containing 1	-0.683577	0.000295083	-0.609328	0.00328549
FXYD5	ENSG00000089327	FXYD domain containing ion transport regulator 5	-0.689072	0.00952053	-0.902262	0.00176398
EHF	ENSG00000135373	ETS homologous factor	-0.69422	0.00112592	-0.640232	0.00928783
NFIB	ENSG00000147862	nuclear factor I B	-0.703668	5.76986e-07	-0.464103	0.0348432
HIPK2	ENSG00000064393	homeodomain interacting protein kinase 2	-0.704722	9.32785e-05	-0.492845	0.0125849
NHS	ENSG00000188158	NHS actin remodeling regulator	-0.707075	1.46565e-06	-0.810276	4.62517e-05
PHLDB2	ENSG00000144824	pleckstrin homology like domain family B member 2	-0.707881	6.46316e-06	-0.49379	0.0103958
LRRC8C	ENSG00000171488	leucine rich repeat containing 8 VRAC subunit C	-0.720055	0.00583753	-0.52242	0.0610691
CD59	ENSG00000085063	CD59 molecule (CD59 blood group)	-0.728161	3.13669e-08	-0.527911	0.000315696
PPFIBP1	ENSG00000110841	PPFIA binding protein 1	-0.7294	4.85263e-09	-0.9646	1.33739e-16
PER3	ENSG00000049246	period circadian regulator 3	-0.743502	0.00291762	-1.20731	2.47618e-05
LYST	ENSG00000143669	lysosomal trafficking regulator	-0.768971	0.000855162	-0.762745	0.00916603
TGFBR2	ENSG00000163513	transforming growth factor beta receptor 2	-0.776622	0.000257721	-0.616358	0.0309324
SERPINB5	ENSG00000206075	serpin family B member 5	-0.776637	1.17072e-05	-0.750473	1.86402e-05
MAPRE2	ENSG00000166974	microtubule associated protein RP/EB family member 2	-0.777606	0.00692691	-1.20267	2.22385e-06
SH3RF1	ENSG00000154447	SH3 domain containing ring finger 1	-0.786136	0.000234168	-0.606436	0.0315434
ARL4D	ENSG00000175906	ADP ribosylation factor like GTPase 4D	-0.788216	0.000500786	-0.708681	0.00561822
DIPK1A	ENSG00000154511	divergent protein kinase domain 1A	-0.789008	0.00522996	-0.526007	0.00539156
KLF5	ENSG00000102554	Kruppel like factor 5	-0.79452	1.51983e-05	-0.528277	0.0241962
RAB7B	ENSG00000276600	RAB7B, member RAS oncogene family	-0.797948	0.0655612	-1.15639	0.0158542
STARD13	ENSG00000133121	StAR related lipid transfer domain containing 13	-0.803868	0.015963	-0.757688	0.0464668
ATL2	ENSG00000119787	atlastin GTPase 2	-0.837367	2.2903e-05	-0.503639	0.0649342
KIFAP3	ENSG00000075945	kinesin associated protein 3	-0.869041	0.0116191	-0.889517	0.0219475
GPR161	ENSG00000143147	G protein-coupled receptor 161	-0.872285	5.49057e-06	-0.774909	0.00239714
CHST15	ENSG00000182022	carbohydrate sulfotransferase 15	-0.885133	2.45717e-06	-0.426542	0.0877866
CNTNAP3	ENSG00000106714	contactin associated protein family member 3	-0.914947	0.000812455	-1.14983	0.00489495
NUP50-DT	ENSG00000226328	NUP50 divergent transcript	-0.930998	0.00044018	-1.32115	5.44712e-07
DAPP1	ENSG00000070190	dual adaptor of phosphotyrosine and 3-phosphoinositides 1	-0.93913	0.000749459	-0.667222	0.0446347
CITED4	ENSG00000179862	Cbp/p300 interacting transactivator with Glu/Asp rich carboxy-terminal domain 4	-0.973465	0.0318497	-0.752654	0.0785867
SH3RF2	ENSG00000156463	SH3 domain containing ring finger 2	-0.98127	1.90809e-06	-0.926983	4.74204e-05
ZNF675	ENSG00000197372	zinc finger protein 675	-1.07312	3.81669e-06	-0.564933	0.0546753
MARCKSL1	ENSG00000175130	MARCKS like 1	-1.07683	0.0246163	-0.883812	0.0895171
LPGAT1	ENSG00000123684	lysophosphatidylglycerol acyltransferase 1	-1.08098	1.17176e-11	-0.626399	0.0027283
DNMBP	ENSG00000107554	dynamin binding protein	-1.08528	0.000295184	-1.02324	0.000623746
IGSF3	ENSG00000143061	immunoglobulin superfamily member 3	-1.08846	3.19445e-10	-0.653648	0.000428974
ABCC3	ENSG00000108846	ATP binding cassette subfamily C member 3	-1.09652	0.00364936	-0.982206	0.0402395
TGFB2	ENSG00000092969	transforming growth factor beta 2	-1.10765	0.00669767	-1.45129	0.0065387
NCKAP5	ENSG00000176771	NCK associated protein 5	-1.1117	7.60368e-05	-1.76763	1.6755e-12
TPM1	ENSG00000140416	tropomyosin 1	-1.18598	1.27937e-05	-0.661699	0.0687894
IL1B	ENSG00000125538	interleukin 1 beta	-1.18643	0.0080214	-1.6252	0.000662862
C1orf116	ENSG00000182795	chromosome 1 open reading frame 116	-1.18807	7.01598e-06	-0.728694	0.0348432
C1orf21	ENSG00000116667	chromosome 1 open reading frame 21	-1.23682	1.47355e-07	-0.963401	0.00391106
SORL1	ENSG00000137642	sortilin related receptor 1	-1.25981	1.41747e-18	-0.467288	0.000102153
ADGRF4	ENSG00000153294	adhesion G protein-coupled receptor F4	-1.28398	0.000586344	-1.81219	0.000251915
SLC48A1	ENSG00000211584	solute carrier family 48 member 1	-1.29733	3.74571e-14	-0.763822	6.4405e-05
ABCA12	ENSG00000144452	ATP binding cassette subfamily A member 12	-1.3296	3.85847e-05	-3.34318	0.0666174
LHFPL2	ENSG00000145685	LHFPL tetraspan subfamily member 2	-1.33588	5.69404e-12	-0.60503	0.0259583
SPINK5	ENSG00000133710	serine peptidase inhibitor Kazal type 5	-1.3392	0.000278274	-1.13153	0.0119789
GRIP1	ENSG00000155974	glutamate receptor interacting protein 1	-1.34192	0.00152902	-1.44743	0.0218851
MID2	ENSG00000080561	midline 2	-1.36996	0.000277839	-0.935042	0.0839379
ZNF219	ENSG00000165804	zinc finger protein 219	-1.37705	1.21212e-09	-0.602318	0.0456206
UCA1	ENSG00000214049	urothelial cancer associated 1	-1.38188	8.07892e-07	-0.42543	0.0324905
ST3GAL1	ENSG00000008513	ST3 beta-galactoside alpha-2,3-sialyltransferase 1	-1.39825	4.19547e-11	-0.967907	4.85568e-06
SH3PXD2A	ENSG00000107957	SH3 and PX domains 2A	-1.40415	9.41792e-10	-0.601419	0.0575908
CEMIP	ENSG00000103888	cell migration inducing hyaluronidase 1	-1.42723	0.0198669	-0.942223	0.016503
CD70	ENSG00000125726	CD70 molecule	-1.43091	0.0170497	-1.46655	0.00506308
KLHL5	ENSG00000109790	kelch like family member 5	-1.45205	2.10818e-27	-0.594114	0.000488668
GBP6	ENSG00000183347	guanylate binding protein family member 6	-1.47471	1.1712e-12	-0.654256	0.00904141
LINC02677; LASTR	ENSG00000242147	lncRNA associated with SART3 regulation of splicing	-1.5032	0.0901139	-3.70596	0.000665495
DAAM1	ENSG00000100592	dishevelled associated activator of morphogenesis 1	-1.51506	7.88449e-72	-0.729794	4.00443e-20
HCAR2	ENSG00000182782	hydroxycarboxylic acid receptor 2	-1.52691	9.4486e-06	-1.05112	0.00734255
MAMDC2	ENSG00000165072	MAM domain containing 2	-1.57808	0.039932	-3.94817	0.0228791
ADAMTS15	ENSG00000166106	ADAM metallopeptidase with thrombospondin type 1 motif 15	-1.60698	0.0334727	-1.45562	2.50584e-06
CD99	ENSG00000002586	CD99 molecule (Xg blood group)	-1.61965	8.43602e-25	-0.567982	0.00341959
TGFBI	ENSG00000120708	transforming growth factor beta induced	-1.64901	1.294e-19	-0.953434	2.96663e-06
DCBLD2	ENSG00000057019	discoidin, CUB and LCCL domain containing 2	-1.65194	2.76003e-20	-1.61632	1.3113e-17
MTSS1	ENSG00000170873	MTSS I-BAR domain containing 1	-1.67212	0.00050562	-2.80821	8.25596e-19
PEG10	ENSG00000242265	paternally expressed 10	-1.68347	0.00592719	-0.818993	0.000377463
RASAL2-AS1	ENSG00000224687	RASAL2 antisense RNA 1	-1.69289	0.00160712	-1.03956	0.0806443
SLC31A2	ENSG00000136867	solute carrier family 31 member 2	-1.73616	1.32892e-10	-0.70073	0.0479215
ANO1	ENSG00000131620	anoctamin 1	-1.73728	6.37711e-11	-0.926016	5.44712e-07
PFKFB3	ENSG00000170525	6-phosphofructo-2-kinase/fructose-2,6-biphosphatase 3	-1.78449	1.84506e-19	-0.528516	0.0872958
LTBP2	ENSG00000119681	latent transforming growth factor beta binding protein 2	-1.81467	1.92334e-06	-1.67413	1.73183e-07
INHBA	ENSG00000122641	inhibin subunit beta A	-1.82749	0.0041258	-2.02025	0.00193472
SLC22A23	ENSG00000137266	solute carrier family 22 member 23	-1.87269	2.52725e-23	-0.526253	0.00422537
SOGA1	ENSG00000149639	suppressor of glucose, autophagy associated 1	-1.88715	2.26564e-29	-0.627283	0.00904141
KLHL4	ENSG00000102271	kelch like family member 4	-1.89499	0.01241	-1.66544	0.0233203
LINC01133	ENSG00000224259	long intergenic non-protein coding RNA 1133	-1.89503	1.53712e-07	-1.01422	0.0369434
KLK7	ENSG00000169035	kallikrein related peptidase 7	-1.89691	2.36174e-09	-1.43635	0.000137548
SULF2	ENSG00000196562	sulfatase 2	-1.91772	4.86195e-18	-0.684987	0.0030217
CTSV	ENSG00000136943	cathepsin V	-1.92441	4.54839e-15	-1.07353	0.00032295
ZBED2	ENSG00000177494	zinc finger BED-type containing 2	-1.94991	2.22195e-06	-2.94369	3.38409e-06
SLC16A9	ENSG00000165449	solute carrier family 16 member 9	-1.95251	2.38585e-05	-1.24593	0.00333647
TENM2	ENSG00000145934	teneurin transmembrane protein 2	-1.96469	0.00150638	-0.923847	1.62089e-09
MELTF	ENSG00000163975	melanotransferrin	-1.98293	1.46946e-17	-0.966994	7.08849e-07
SMIM3	ENSG00000256235	small integral membrane protein 3	-1.99807	1.53712e-07	-1.52687	3.38128e-05
MN1	ENSG00000169184	MN1 proto-oncogene, transcriptional regulator	-2.00651	4.39934e-05	-1.00947	0.0125769
WNT5B	ENSG00000111186	Wnt family member 5B	-2.0079	0.000223439	-2.36675	0.000582203
FLRT2	ENSG00000185070	fibronectin leucine rich transmembrane protein 2	-2.02699	6.30478e-24	-1.15747	8.86618e-13
THSD4	ENSG00000187720	thrombospondin type 1 domain containing 4	-2.03889	2.84852e-08	-1.37352	9.08754e-07
DSC2	ENSG00000134755	desmocollin 2	-2.08021	4.6223e-19	-1.10959	9.0858e-06
POPDC3	ENSG00000132429	popeye domain containing 3	-2.08632	2.49993e-11	-1.27842	1.64311e-06
SEMA5A	ENSG00000112902	semaphorin 5A	-2.1161	7.64943e-05	-1.78028	0.0300476
CREG2	ENSG00000175874	cellular repressor of E1A stimulated genes 2	-2.1463	0.000309486	-1.32695	3.32242e-08
ZNF462	ENSG00000148143	zinc finger protein 462	-2.17564	6.3944e-46	-0.358079	0.0487069
ADAMTS16	ENSG00000145536	ADAM metallopeptidase with thrombospondin type 1 motif 16	-2.22834	0.0151835	-3.55571	0.0539093
S100A9	ENSG00000163220	S100 calcium binding protein A9	-2.26121	0.00222999	-2.07091	0.0643864
FAM43A	ENSG00000185112	family with sequence similarity 43 member A	-2.28786	1.86126e-08	-1.08823	0.0285275
SERPINB7	ENSG00000166396	serpin family B member 7	-2.29275	0.0210575	-2.34329	0.0968331
GNAL	ENSG00000141404	G protein subunit alpha L	-2.29983	5.39274e-05	-1.41462	0.0696147
KCNJ15	ENSG00000157551	potassium inwardly rectifying channel subfamily J member 15	-2.43576	2.5356e-20	-1.60813	3.16508e-09
AL358334.2	ENSG00000258711	novel transcript]	-2.4598	0.000122756	-1.5538	0.0548461
FST	ENSG00000134363	follistatin	-2.48368	9.64428e-07	-1.93748	0.000703114
RHOBTB3	ENSG00000164292	Rho related BTB domain containing 3	-2.54327	3.84921e-57	-0.532526	0.00934051
HTRA1	ENSG00000166033	HtrA serine peptidase 1	-2.58744	8.5032e-09	-1.39631	0.00429538
RTN4RL1	ENSG00000185924	reticulon 4 receptor like 1	-2.63078	2.99843e-07	-1.07644	0.034315
PID1	ENSG00000153823	phosphotyrosine interaction domain containing 1	-2.64574	3.65773e-05	-1.36995	0.0865332
KIAA1549L	ENSG00000110427	KIAA1549 like	-2.70162	0.0835414	-1.89892	0.000806821
NID1	ENSG00000116962	nidogen 1	-2.74183	0.0898029	-1.34312	0.000765873
TLR6	ENSG00000174130	toll like receptor 6	-2.74985	4.80402e-12	-1.4333	3.24142e-07
NIPAL4	ENSG00000172548	NIPA like domain containing 4	-2.75273	0.0321518	-1.44059	0.0930916
CERS3	ENSG00000154227	ceramide synthase 3	-2.76375	6.32374e-15	-0.993007	0.00148568
MMP9	ENSG00000100985	matrix metallopeptidase 9	-2.80604	0.0721233	-1.40291	0.0699166
IGFL2-AS1	ENSG00000268621	IGFL2 antisense RNA 1	-2.85086	8.41667e-23	-1.70463	6.14081e-08
ALDH1A3	ENSG00000184254	aldehyde dehydrogenase 1 family member A3	-2.85208	2.63321e-39	-1.9024	3.12736e-24
EPB41L1	ENSG00000088367	erythrocyte membrane protein band 4.1 like 1	-2.91868	9.0261e-50	-0.725888	0.00994141
CNTN1	ENSG00000018236	contactin 1	-2.9266	6.13367e-15	-1.11884	0.0109373
TM4SF19	ENSG00000145107	transmembrane 4 L six family member 19	-3.10713	0.0319991	-1.46155	0.00239714
LUCAT1	ENSG00000248323	lung cancer associated transcript 1	-3.22821	0.000617882	-2.13222	0.0462995
PTGES	ENSG00000148344	prostaglandin E synthase	-3.29134	5.51715e-14	-1.39432	0.0183922
CALML3	ENSG00000178363	calmodulin like 3	-3.36221	2.42925e-14	-1.36977	0.0144217
RBP1	ENSG00000114115	retinol binding protein 1	-3.39049	2.27833e-11	-1.12461	1.23986e-05
NFASC	ENSG00000163531	neurofascin	-3.51188	1.0414e-05	-1.62153	0.0429253
ANXA10	ENSG00000109511	annexin A10	-3.58352	0.00418387	-3.24838	0.000716321
FLRT3	ENSG00000125848	fibronectin leucine rich transmembrane protein 3	-3.81679	1.97147e-17	-2.61516	2.77613e-08
PLAT	ENSG00000104368	plasminogen activator, tissue type	-3.82112	2.48955e-22	-1.33372	0.00667314
PAPPA	ENSG00000182752	pappalysin 1	-3.82401	0.00701262	-3.1752	1.3708e-08
TNIK	ENSG00000154310	TRAF2 and NCK interacting kinase	-3.85125	4.0251e-35	-2.44889	1.68181e-19
GFPT2	ENSG00000131459	glutamine-fructose-6-phosphate transaminase 2	-3.88524	4.64537e-05	-3.65281	0.000600742
MECOM	ENSG00000085276	MDS1 and EVI1 complex locus	-3.97853	1.11297e-37	-1.4539	4.99997e-12
DHRS9	ENSG00000073737	dehydrogenase/reductase 9	-3.99622	2.35823e-14	-3.5039	0.0114897
TMPRSS11D	ENSG00000153802	transmembrane serine protease 11D	-5.04872	0.000146501	-1.40234	0.0242898
LAMA1	ENSG00000101680	laminin subunit alpha 1	-5.48306	1.30507e-05	-0.959171	0.0106854

## Sheet: S1D
Supplementary Table S1D. Gene Ontology enrichment analysis of 252 genes commonly affected by EVI1 in CAL-33 and SCC-25 cells. Analyses were performed using ShinyGO v0.61.
Functional Category	Enrichment FDR	Genes in list	Total genes
Regulation of multicellular organismal process	1.76e-08	82	3532
Tissue development	3.7e-08	60	2205
Epithelium development	2.56e-07	44	1408
Regulation of multicellular organismal development	2.56e-07	58	2229
Animal organ development	3.56e-07	82	3864
Regulation of developmental process	4.53e-07	67	2866
Cell differentiation	5.71e-06	88	4595
Extracellular matrix organization	5.71e-06	21	433
Epithelial cell differentiation	5.71e-06	30	848
Extracellular structure organization	5.71e-06	21	434
Cellular developmental process	5.71e-06	89	4691
Negative regulation of developmental process	5.71e-06	34	1054
Cell adhesion	1.76e-05	43	1632
Anatomical structure morphogenesis	1.76e-05	62	2851
Biological adhesion	1.85e-05	43	1639
Negative regulation of multicellular organismal process	0.000106678	36	1326
Regulation of anatomical structure morphogenesis	0.000122276	33	1166
Circulatory system development	0.000122276	32	1107
Response to endogenous stimulus	0.000156288	42	1724
Cellular response to growth factor stimulus	0.000238593	24	713
Cellular response to endogenous stimulus	0.000292431	37	1461
Regulation of hair follicle development	0.000398218	5	20
Response to growth factor	0.000405304	24	741
Epithelial cell proliferation	0.000509699	17	409
Chondrocyte differentiation	0.000603748	9	111
Cell population proliferation	0.000603748	46	2100
Cellular response to transforming growth factor beta stimulus	0.000637001	13	250
Response to transforming growth factor beta	0.000795338	13	256
Regulation of cell population proliferation	0.00097129	41	1818
Regulation of epithelial cell proliferation	0.00106576	15	349
Regulation of localization	0.00107638	57	2934
Regulation of cell differentiation	0.00107638	44	2034
Regulation of epidermis development	0.00107638	8	93
Blood vessel development	0.00155086	22	712
Cell adhesion involved in heart morphogenesis	0.00157738	3	5
Anatomical structure formation involved in morphogenesis	0.00161052	30	1175
Regulation of cell adhesion	0.00167013	24	832
Regulation of hair cycle	0.00167013	5	29
Cardiac muscle cell proliferation	0.00167013	6	49
Positive regulation of multicellular organismal process	0.00186765	42	1961
Blood vessel morphogenesis	0.00226357	20	631
Vasculature development	0.00245973	22	744
Regulation of cellular component movement	0.00256112	28	1094
Camera-type eye development	0.00260536	14	343
Morphogenesis of an epithelium	0.00327212	19	600
Regulation of cell migration	0.00327212	25	937
Tissue morphogenesis	0.00327212	21	707
Connective tissue development	0.00327212	12	264
Tube morphogenesis	0.00327404	24	880
Enzyme linked receptor protein signaling pathway	0.00333647	28	1120
Lens development in camera-type eye	0.00345691	7	86
Adiponectin secretion	0.00345691	3	7
Regulation of adiponectin secretion	0.00345691	3	7
Regulation of transmembrane receptor protein serine/threonine kinase signaling pathway	0.00345691	12	269
Regulation of cell motility	0.00345691	26	1003
Cell migration	0.00372316	35	1579
Movement of cell or subcellular component	0.00397602	45	2265
Glomerulus development	0.00399621	6	61
Tube development	0.00417513	27	1084
Retinoic acid biosynthetic process	0.00468574	3	8
Striated muscle cell proliferation	0.00468574	6	64
Biological phase	0.00468574	3	8
Hair cycle phase	0.00468574	3	8
Regulation of hair follicle maturation	0.00468574	3	8
Positive regulation of cardiac epithelial to mesenchymal transition	0.00468574	3	8
Regulation of cardiac muscle cell proliferation	0.00471718	5	40
Positive regulation of developmental process	0.00524983	33	1489
Regulation of signaling	0.00532571	66	3872
Regulation of locomotion	0.00532571	26	1049
Hematopoietic or lymphoid organ development	0.00532571	26	1050
Cartilage development	0.00532571	10	204
Cellular response to chemical stimulus	0.00562175	63	3652
Regulation of cellular response to growth factor stimulus	0.00562175	12	292
Negative regulation of cellular response to growth factor stimulus	0.00580272	9	168
Diterpenoid biosynthetic process	0.00590789	3	9
Regulation of cardiac epithelial to mesenchymal transition	0.00590789	3	9
Nervous system development	0.00591245	48	2548
Regulation of cell communication	0.00629331	65	3832
Regulation of endocrine process	0.00629331	5	44
Regulation of calcium-dependent cell-cell adhesion	0.00629331	2	2
Negative regulation of transmembrane receptor protein serine/threonine kinase signaling pathway	0.00629331	8	135
Trans-synaptic signaling by BDNF, modulating synaptic transmission	0.00629331	2	2
Trans-synaptic signaling by BDNF	0.00629331	2	2
Microvillus organization	0.00642802	4	24
Eye development	0.0064574	14	397
Regulation of cell junction assembly	0.00667545	10	215
Actin filament-based process	0.00691766	22	839
Visual system development	0.00692343	14	401
Negative regulation of hydrolase activity	0.00709344	16	505
Regulation of system process	0.00761078	18	617
Protein localization to extracellular region	0.00842344	14	410
Negative regulation of cell differentiation	0.00858955	21	799
Generation of neurons	0.00858955	34	1623
Sensory system development	0.00858955	14	413
Endocrine hormone secretion	0.00858955	5	49
Nephron development	0.00858955	8	144
Plasma membrane bounded cell projection organization	0.00858955	34	1622
Locomotion	0.00865417	39	1973
Cell motility	0.00865417	36	1766
Localization of cell	0.00865417	36	1766
Export from cell	0.00881552	33	1565
Immune system development	0.00891389	26	1111
Embryo implantation	0.00891389	5	50
Regulation of leukocyte differentiation	0.00915519	12	320
Cellular response to organic substance	0.00918581	53	3000
Cell junction organization	0.0093929	20	751
Negative regulation of response to stimulus	0.00951782	37	1850
Secretion by cell	0.0096029	32	1511
Cardiac muscle tissue growth	0.00969041	6	80
Negative regulation of cell population proliferation	0.009698	20	755
Positive regulation of epithelial cell migration	0.00971664	8	150
Smooth muscle cell migration	0.00999132	6	81
Secretion	0.00999132	34	1654
Mesenchymal cell differentiation	0.00999132	10	234

## Sheet: S1E
Supplementary Table S1E. List of 39 genes regulated by EVI1 in both CAL-33 and SCC-25 cells, and correlated with EVI1 expression in the corresponding direction in 522 HNSCC patients from the TCGA Firehose cohort.
					CAL-33		SCC-25
Gene Symbol	Ensembl Gene ID	Description	Spearman correlation	FDR	log2FoldChange	FDR	log2FoldChange	FDR
KCNQ1	ENSG00000053918	potassium voltage-gated channel subfamily Q member 1	0.497	8.52e-32	1.63199	0.0116667	2.28203	4.82956e-05
RASSF6	ENSG00000169435	Ras association domain family member 6	0.486	2.2e-30	1.1023	5.38844e-06	0.773008	0.044664
NPTXR	ENSG00000221890	neuronal pentraxin receptor	0.471	2.59e-28	0.940582	0.00037839	1.36632	3.16462e-06
PARD3B	ENSG00000116117	par-3 family cell polarity regulator beta	0.47	3.38e-28	2.11416	0.0617797	3.79712	0.0430247
PDE5A	ENSG00000138735	phosphodiesterase 5A	0.463	2.76e-27	0.94038	0.00108435	1.65562	0.000148307
MAP7D2	ENSG00000184368	MAP7 domain containing 2	0.456	1.94e-26	2.52134	4.62999e-08	2.82024	0.000111638
TLCD4	ENSG00000152078	TLC domain containing 4	0.454	3.38e-26	0.787505	0.00954159	1.89693	2.32021e-08
BCOR	ENSG00000183337	BCL6 corepressor	0.452	5.86e-26	0.783239	1.80686e-07	0.469302	0.010138
FGF2	ENSG00000138685	fibroblast growth factor 2	0.432	1.25e-23	0.736902	0.00599129	0.934606	0.0546753
NTRK2	ENSG00000148053	neurotrophic receptor tyrosine kinase 2	0.422	1.64e-22	0.831162	0.0246055	2.21033	3.4861e-13
PLS1	ENSG00000120756	plastin 1	0.392	2.51e-19	0.669103	0.000948676	2.0587	8.05762e-09
GLCCI1	ENSG00000106415	glucocorticoid induced 1	0.387	6.71e-19	0.57574	0.0954217	1.59283	0.000744146
TTLL7	ENSG00000137941	tubulin tyrosine ligase like 7	0.363	1.27e-16	1.46685	0.00417804	1.37872	0.011245
UGT8	ENSG00000174607	UDP glycosyltransferase 8	0.337	2.43e-14	0.793264	0.00176882	3.3994	4.17773e-15
HCLS1	ENSG00000180353	hematopoietic cell-specific Lyn substrate 1	0.31	2.98e-12	1.29142	0.0506515	0.454972	0.0384365
ADGRF4	ENSG00000153294	adhesion G protein-coupled receptor F4	-0.302	1.16e-11	-1.28398	0.000586344	-1.81219	0.000251915
FLRT3	ENSG00000125848	fibronectin leucine rich transmembrane protein 3	-0.315	1.19e-12	-3.81679	1.97147e-17	-2.61516	2.77613e-08
TNS4	ENSG00000131746	tensin 4	-0.321	4.31e-13	-0.381998	0.0500614	-0.543831	0.00494896
ELL2	ENSG00000118985	elongation factor for RNA polymerase II 2	-0.321	4.55e-13	-0.280179	0.0712824	-0.643512	7.81943e-07
HTRA1	ENSG00000166033	HtrA serine peptidase 1	-0.332	5.33e-14	-2.58744	8.5032e-09	-1.39631	0.00429538
DSC2	ENSG00000134755	desmocollin 2	-0.334	4.01e-14	-2.08021	4.6223e-19	-1.10959	9.0858e-06
PTHLH	ENSG00000087494	parathyroid hormone like hormone	-0.347	3.17e-15	-0.679322	0.0124789	-0.770475	0.00188021
PRNP	ENSG00000171867	prion protein	-0.354	8.32e-16	-0.397666	0.022798	-0.583012	0.00105334
CDH3	ENSG00000062038	cadherin 3	-0.367	6.19e-17	-0.496474	0.00333097	-0.576788	0.000937266
CITED4	ENSG00000179862	Cbp/p300 interacting transactivator with Glu/Asp rich carboxy-terminal domain 4	-0.374	1.16e-17	-0.973465	0.0318497	-0.752654	0.0785867
ZBED2	ENSG00000177494	zinc finger BED-type containing 2	-0.378	5.39e-18	-1.94991	2.22195e-06	-2.94369	3.38409e-06
SERPINB5	ENSG00000206075	serpin family B member 5	-0.38	3.67e-18	-0.776637	1.17072e-05	-0.750473	1.86402e-05
S100A11	ENSG00000163191	S100 calcium binding protein A11	-0.381	2.62e-18	-0.486619	0.0237491	-0.487484	0.0716923
CTSV	ENSG00000136943	cathepsin V	-0.381	2.79e-18	-1.92441	4.54839e-15	-1.07353	0.00032295
GFOD1	ENSG00000145990	glucose-fructose oxidoreductase domain containing 1	-0.392	2.45e-19	-0.683577	0.000295083	-0.609328	0.00328549
SLC31A2	ENSG00000136867	solute carrier family 31 member 2	-0.399	4.4e-20	-1.73616	1.32892e-10	-0.70073	0.0479215
CERS3	ENSG00000154227	ceramide synthase 3	-0.401	2.66e-20	-2.76375	6.32374e-15	-0.993007	0.00148568
ARL4D	ENSG00000175906	ADP ribosylation factor like GTPase 4D	-0.401	2.84e-20	-0.788216	0.000500786	-0.708681	0.00561822
C6ORF141	ENSG00000197261	chromosome 6 open reading frame 141	-0.407	6.57e-21	-0.633436	0.0228193	-0.940521	0.000342551
PYGL	ENSG00000100504	glycogen phosphorylase L	-0.437	3.54e-24	-0.482123	8.07876e-06	-0.393549	0.000772658
KLK7	ENSG00000169035	kallikrein related peptidase 7	-0.44	1.38e-24	-1.89691	2.36174e-09	-1.43635	0.000137548
NIPAL4	ENSG00000172548	NIPA like domain containing 4	-0.446	2.83e-25	-2.75273	0.0321518	-1.44059	0.0930916
TM4SF19	ENSG00000145107	transmembrane 4 L six family member 19	-0.452	6.44e-26	-3.10713	0.0319991	-1.46155	0.00239714
CARHSP1	ENSG00000153048	calcium regulated heat stable protein 1	-0.532	5.56e-37	-0.656661	0.000122804	-0.532706	0.0104024
